# Supplementary material
Source: PubMed Central journal article supplement (PMC8777202)
Supplement: 10.1182-2021013531_bloodbld2021013531-suppl1.pdf [file 10.1182-2021013531_bloodbld2021013531-suppl1.pdf]

# Association of Clonal Hematopoiesis with Chronic Obstructive Pulmonary Disease

## Supplemental Appendix

### Supplemental Figures

|                                                                                                                                                                                           |    |
|-------------------------------------------------------------------------------------------------------------------------------------------------------------------------------------------|----|
| Figure S1. Distribution of age across cohorts and COPD status (except UK Biobank)                                                                                                         | 1  |
| Figure S2. Clonal hematopoietic mutations variant allele frequencies (VAF) across cohorts and distribution between cases and controls                                                     | 2  |
| Figure S3. Association between CHIP and COPD in TOPMed Studies                                                                                                                            | 3  |
| Figure S4. Incidence Analysis in UK Biobank                                                                                                                                               | 4  |
| Figure S5. Smoking and CHIP                                                                                                                                                               | 5  |
| Figure S6. Distribution of the difference in the number of years between blood draw and assessment of COPD status using spirometry measures in the COPDGene and additional TOPMed cohorts | 6  |
| Figure S7. Meta-analysis results of CHIP and GOLD 2 COPD within different strata of smoking exposure                                                                                      | 7  |
| Figure S8. Effect of Hematopoietic <i>Tef2</i> Deletion on Emphysema Development in Smoke Exposure Models                                                                                 | 8  |
| Figure S9. Single Cell RNA-Sequencing Data in Mouse Model of COPD and CHIP                                                                                                                | 9  |
| Figure S10. Single Cell RNA-Sequencing and In Vitro Macrophage Analysis                                                                                                                   | 10 |

### Supplemental Tables

|                                                                                                                                           |        |
|-------------------------------------------------------------------------------------------------------------------------------------------|--------|
| Table S1. Detailed Cohort Characteristics                                                                                                 | 11     |
| Table S2. Covariate information between COPD cases (GOLD 2-4) and controls for each study                                                 | 12     |
| Table S3. Prevalence of CHIP across COPD status and cohorts                                                                               | 13     |
| Table S4. Association between CHIP and COPD-related phenotypes in the COPDGene study                                                      | 14     |
| Table S5. Association between CHIP and COPD after adjusting for possible confounders in COPDGene                                          | 15     |
| Table S6. Association between CHIP driver genes and COPD in the COPDGene dataset                                                          | 16     |
| Table S7. Association between CHIP and COPD-related phenotypes in the meta-analyses of TOPMed cohorts                                     | 17     |
| Table S8. Association between CHIP and COPD-related phenotypes in the UK Biobank data                                                     | 18     |
| Table S9. Association between CHIP and COPD-related phenotypes in the ICGN-EOCOPD dataset                                                 | 19     |
| Table S10. Association between CHIP and COPD after adjusting for possible confounders in UK Biobank                                       | 20     |
| Table S11. Association between CHIP and COPD-related phenotypes in the meta-analyses of all cohorts                                       | 21     |
| Table S12. Meta-analyses results of the association between GOLD 2-4 COPD and CHIP within different strata of smoking exposure            | 22     |
| Table S13. Association between CHIP driver genes and COPD in the meta-analyses of all cohorts                                             | 23     |
| Table S14: Association between CHIP driver genes and number of pack-years in the meta-analyses of all cohorts                             | 24     |
| Table S15. Individual Values of Mouse Alveolar Cord Length Quantification from Cigarette Smoke and poly(I:C) Exposure Experiment          | 25     |
| Table S16. Individual Values of Mouse Alveolar Cord Length Quantification from Six Month Cigarette Smoke Exposure Experiment              | 26     |
| Table S17. Transcript and Gene Information from Single Cell RNA-Sequencing                                                                | 27     |
| Table S18. Marker Genes Identified for Each Cluster in Single Cell RNA Sequencing Data                                                    | Online |
| Table S19. Signature scores for Hallmark Pathways tested on all cells from mice treated with cigarette smoke and poly(I:C)                | 28     |
| Table S20. Signature scores for Interferon and TGF Beta pathways tested on all cells from mice treated with cigarette smoke and poly(I:C) | 29     |
| Table 21. List of CHIP-Associated Somatic Variants Identified in the Cohort                                                               | 30-58  |

### Extended Methods

59

### Supplemental References

65

**Figure S1. Distribution of age across cohorts and COPD status (except UK Biobank)**

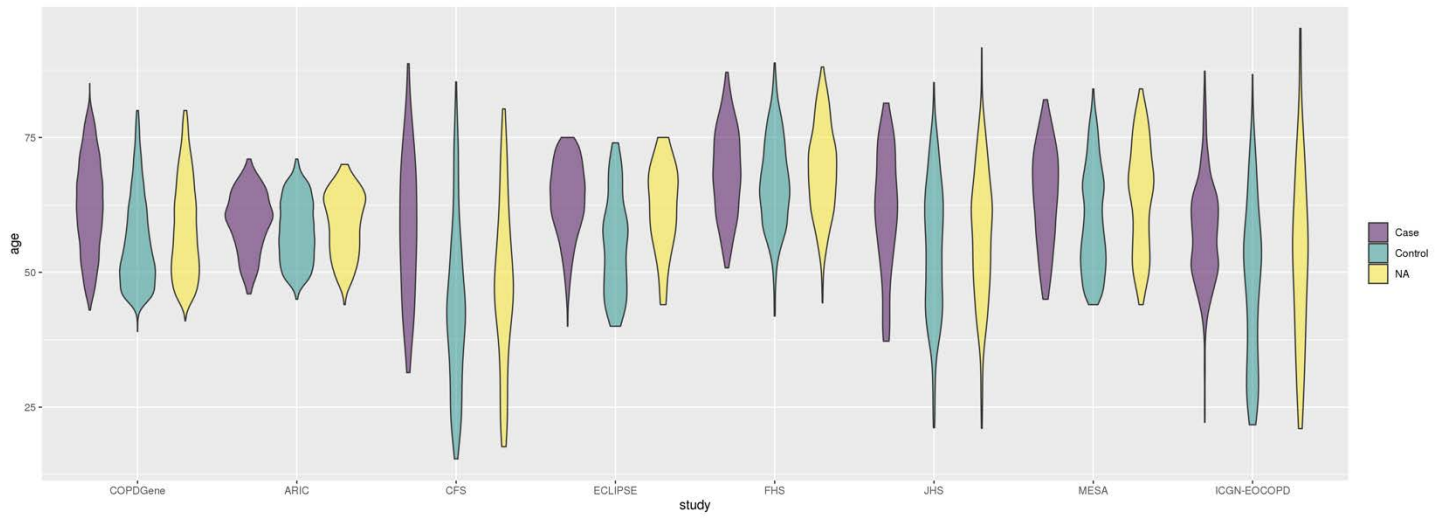

**Figure S2. Clonal hematopoietic mutations variant allele frequencies (VAF) across cohorts and distribution between cases and controls.** (A) Distribution of variant allele frequencies (VAFs) across the cohorts. For patients with multiple mutations, the VAF for the largest clone is shown. The difference in the lowest detected VAFs is a result of COPDGene and TOPMed using whole genome sequencing whereas ICGN-EOCOPD and the UK Biobank utilized whole exome sequencing. The depth of coverage in whole exome sequencing allows for more sensitive detection of smaller clones (See Bick et al, Inherited Causes of Clonal Hematopoiesis of Indeterminate Potential in TOPMed Whole Genomes." bioRxiv: 782748.) (B) Distribution of mutations in controls (red) and moderate to very severe COPD cases (cyan) with CHIP. P-values for comparisons of mutations, controlled for covariates, are shown in Supplemental table S13.

**A**

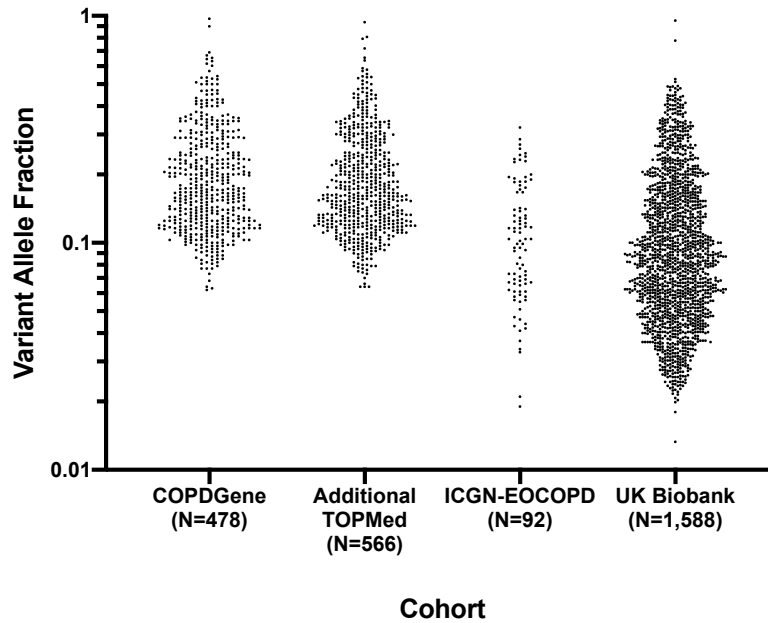

**B**

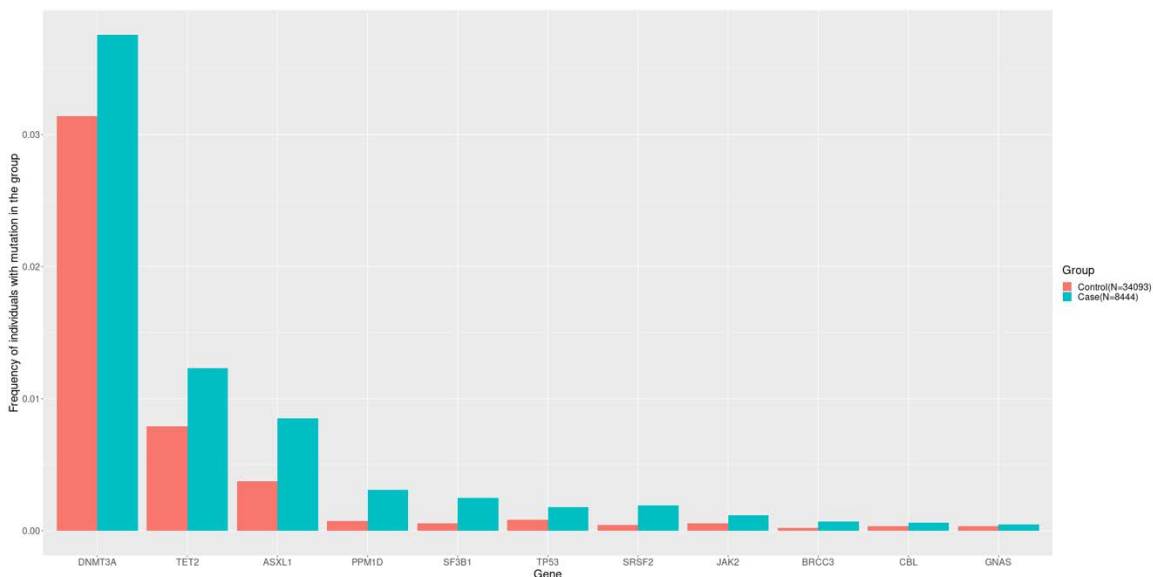

**Figure S3. Association between CHIP and COPD in Additional TOPMed Cohorts**

(A) Association results between CHIP status and moderate-to-severe COPD (GOLD level 2-4) across additional TOPMed cohorts.

(B) Association results between CHIP status and severe COPD (GOLD level 3-4) across additional TOPMed cohorts.

(C) Association results between CHIP status and COPD severity (GOLD level 3-4 versus GOLD level 2) across additional TOPMed cohorts.

**A**

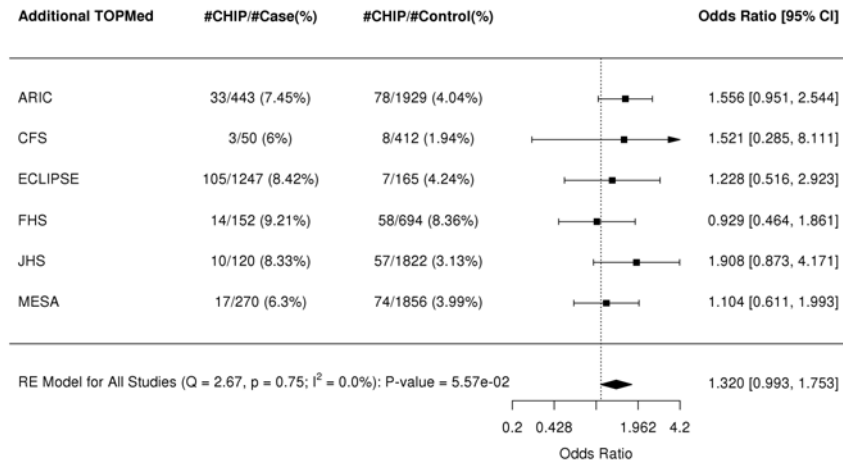

**B**

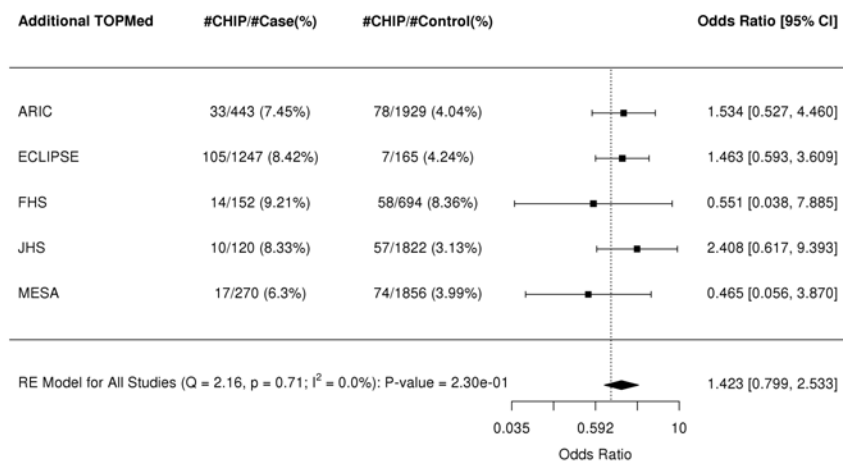

**C**

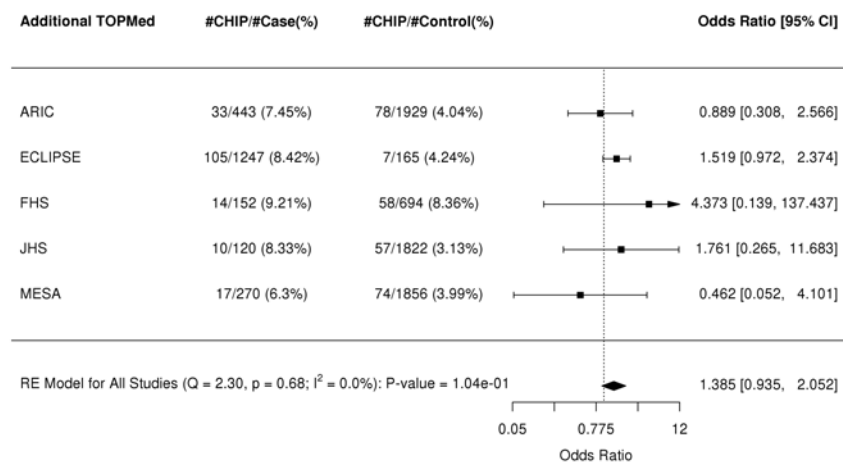

**Figure S4. Incidence Analysis in UK Biobank.**

After excluding individuals with COPD at baseline using our study definition (n=3,676) or with prevalent COPD at study enrollment by self-report or ICD code (additional n=336), there were 23,605 individuals at risk for incident COPD. Using ICD code-based incident COPD ascertainment (ICD-10 J41, J41.0, J42, J43, J43.0, J43.1, J43.2, J43.8, J43.9, J44, J44.0, J44.1, J44.8, J44.9; ICD-9 491, 491.2, 491.9, 492, 492.9, 496, 496.9), 337 individuals (1.4%) developed incident COPD over a median 10.0 [IQR 0.9-10.2] years of follow-up.

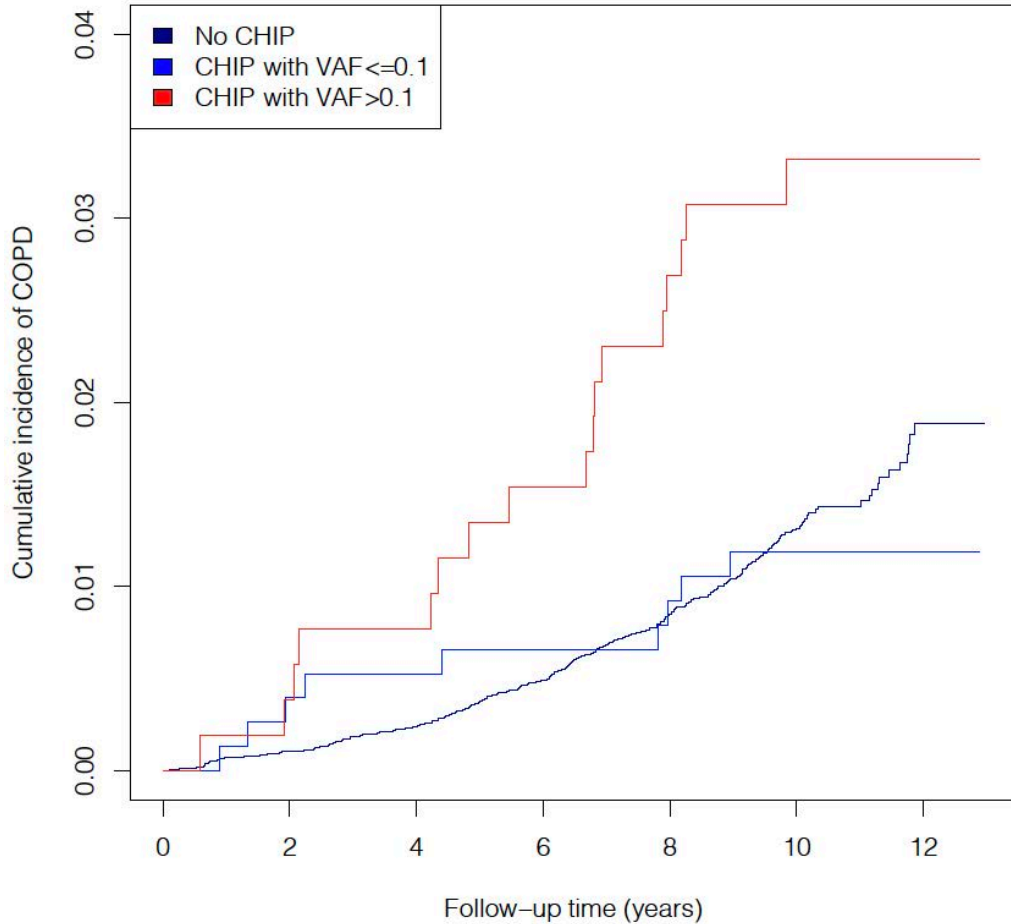

|                      | 0     | 2.5   | 5     | 7.5   | 10    | 12.5 |
|----------------------|-------|-------|-------|-------|-------|------|
| No CHIP              | 22326 | 22291 | 22220 | 22134 | 12562 | 486  |
| CHIP with VAF <= 0.1 | 759   | 755   | 753   | 752   | 418   | 16   |
| CHIP with VAF > 0.1  | 520   | 516   | 513   | 508   | 271   | 7    |

**Figure S5. Smoking and CHIP.**

(A) Distribution of pack-years across cohorts.

(B) Logistic regression was applied on CHIP status as the binary response, while adjusting for gender, age, sequencing center, race, and top 10 principal components in each cohort. Random-effects meta-analyses across the TOPMed cohorts, and across all cohorts were conducted using the R package metafor.

**A**

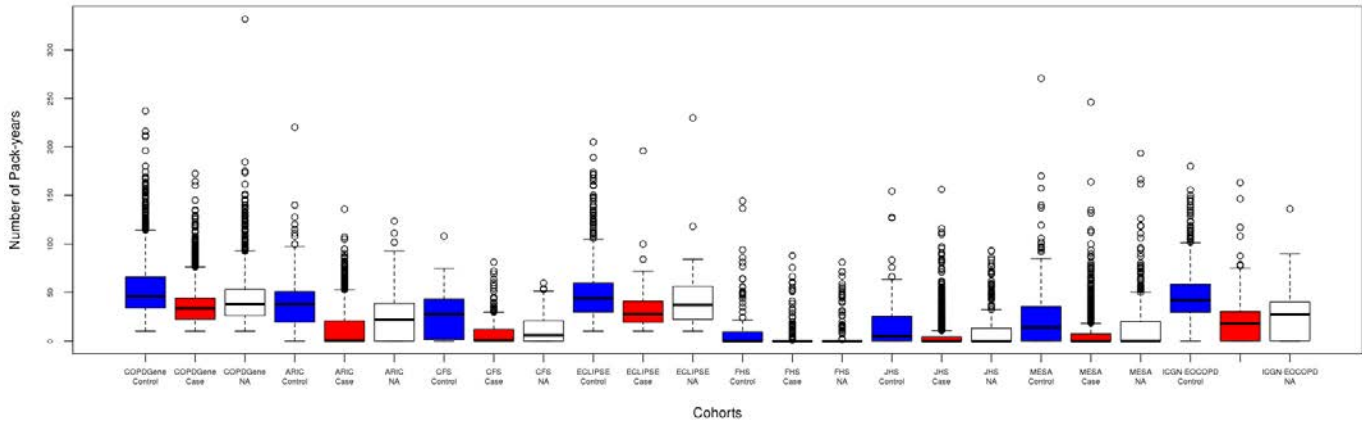

**B**

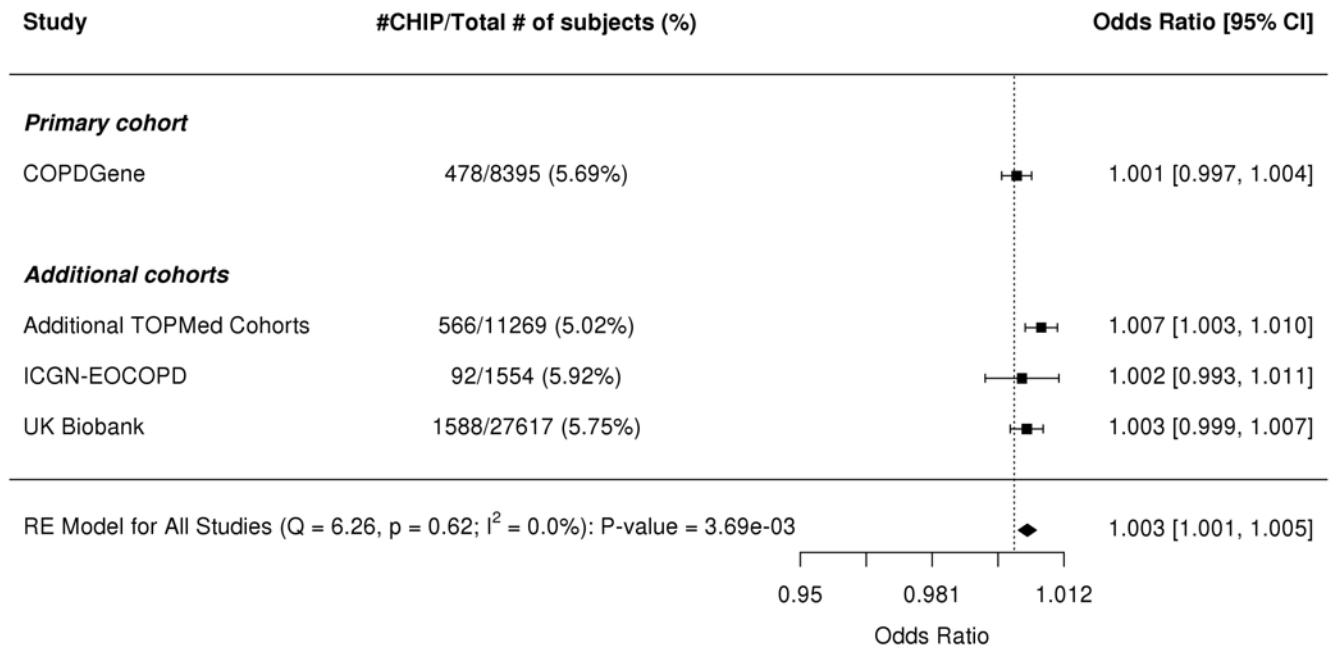

**Figure S6. Distribution of the difference in the number of years between blood draw and assessment of COPD status using spirometry measures in the COPDGene and additional TOPMed cohorts**

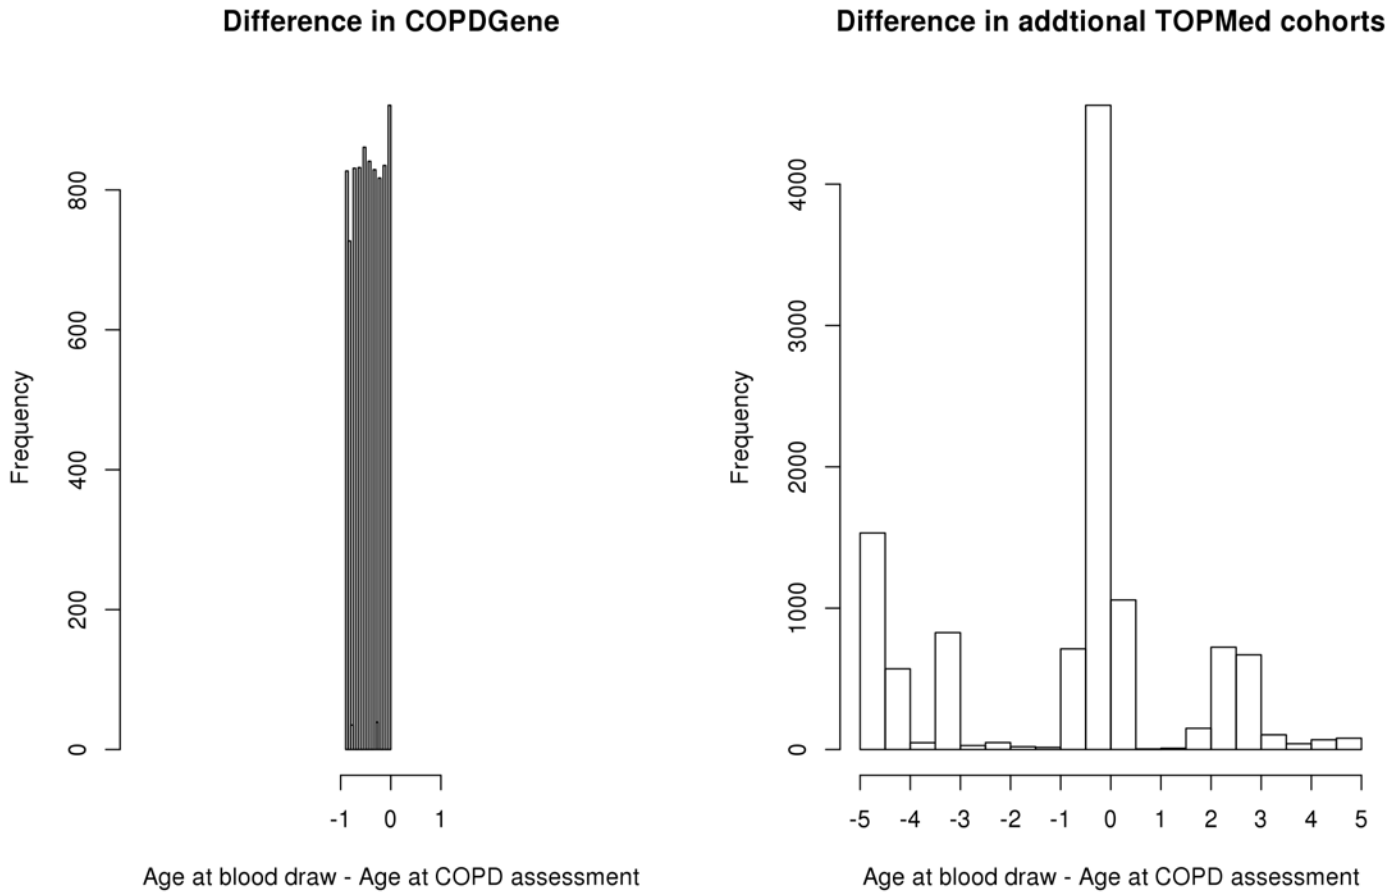

**Figure S7. Meta-analysis results of CHIP and GOLD 2 COPD within different strata of smoking exposure: A) non-smokers only; B) ever-smokers; C) current smokers; D) former smokers; E) heavy smokers (number of pack-years > 30); F) light smokers (number of pack-years < 15).**

Note: There are no non-smokers in COPDGene (panel A) and there are only 3 light smokers with CHIP in the ICGN-EOCOPD cohort (panel F), thus the confidence interval is too wide to contribute to the meta-analysis.

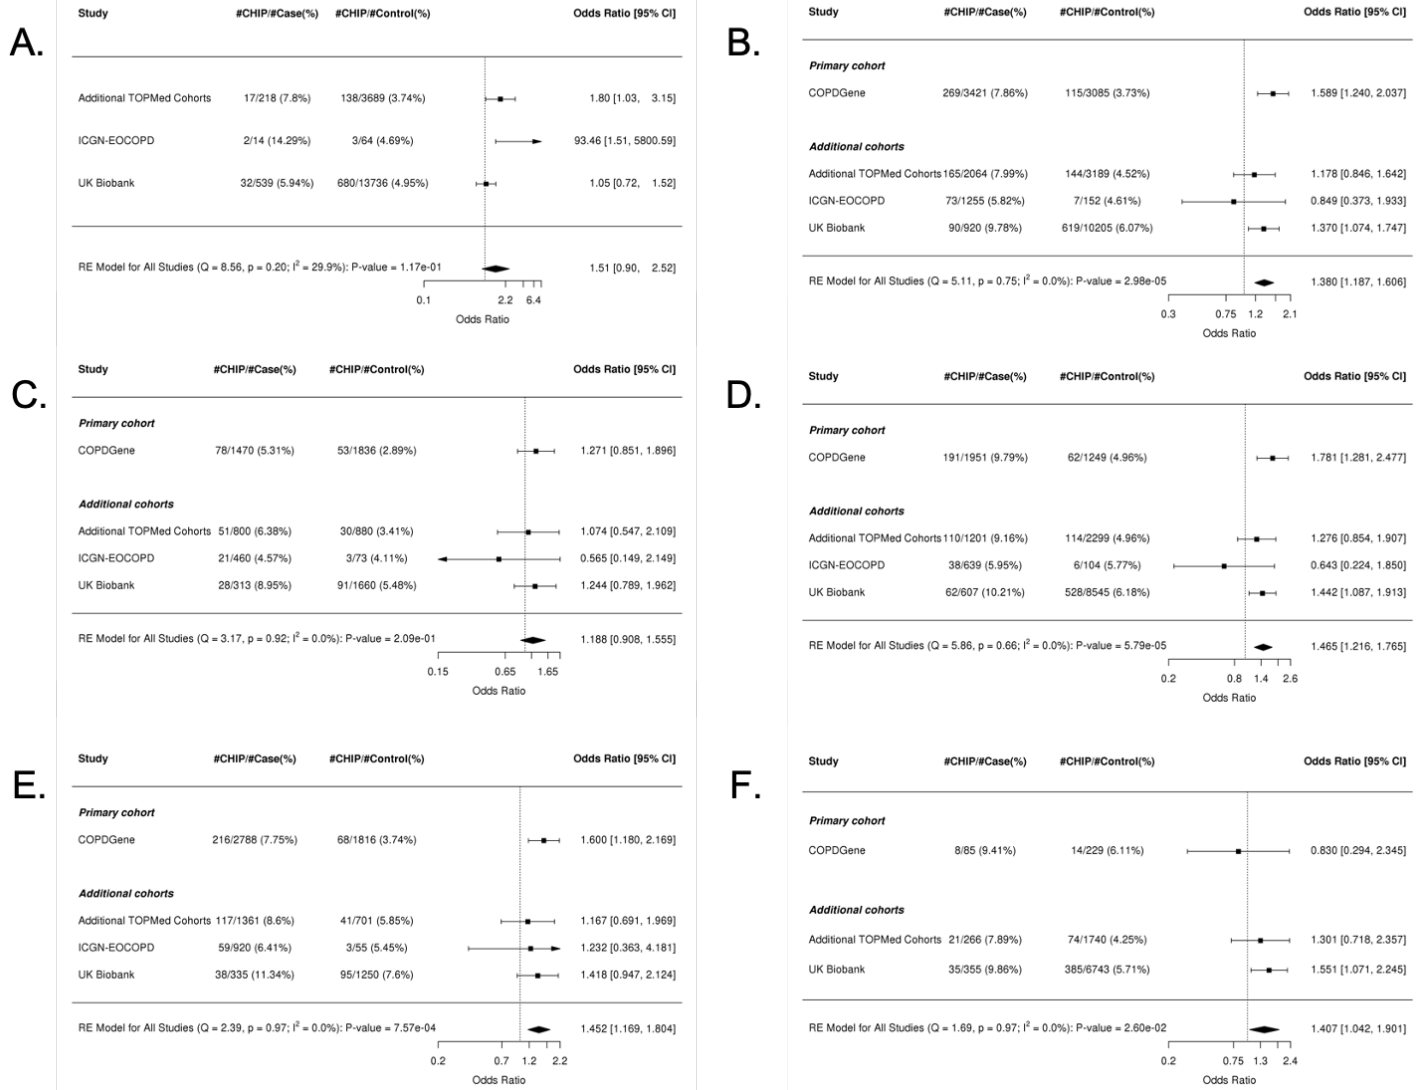



**Figure S8. Effect of Hematopoietic *Tet2* Deletion on Emphysema Development in Smoke Exposure Models.**

- A) Schematic of experimental approach for mice with 15% *Tet2*-wild-type or *Tet2*-knockout bone marrow treated with cigarette smoke for 6 months.
- B) Representative images of airspace destruction from experiment outlined in (A) in *Tet2* wild-type and *Tet2* knockout mice (left) and quantification of emphysema in *Tet2* wild-type (n=5) and *Tet2* knockout (n=4) mice. Shown are SEM.
- C) Peripheral blood chimerism in the six-month exposure experiment of *Tet2*-wild-type (top) or *Tet2*-knockout (bottom) mice measured in the air (black) and smoke-exposure (gray) mice (n=5, shown are SEM.).
- D) Quantification of emphysema in *Tet2* wild-type (n=5) and *Tet2* knockout (n=5) mice air controls for the six month cigarette smoke exposure. Shown are SEM.
- E) Quantification of emphysema in *Tet2* wild-type (n=5) and *Tet2* knockout (n=5) mice exposed to air as a control for the cigarette smoke and poly(I:C) exposure (see Figures 4A-B). Shown are SEM.
- F) Quantification of emphysema in *Tet2* wild-type (n=5) and *Tet2* knockout (n=5) mice exposed to cigarette smoke only as a control for the cigarette smoke and poly(I:C) exposure (see Figures 4A-B). Shown are SEM.
- G) Quantification of emphysema in *Tet2* wild-type (n=5) and *Tet2* knockout (n=5) mice exposed to poly(I:C) only as a control for the cigarette smoke and poly(I:C) exposure (see Figures 4A-B). Shown are SEM.

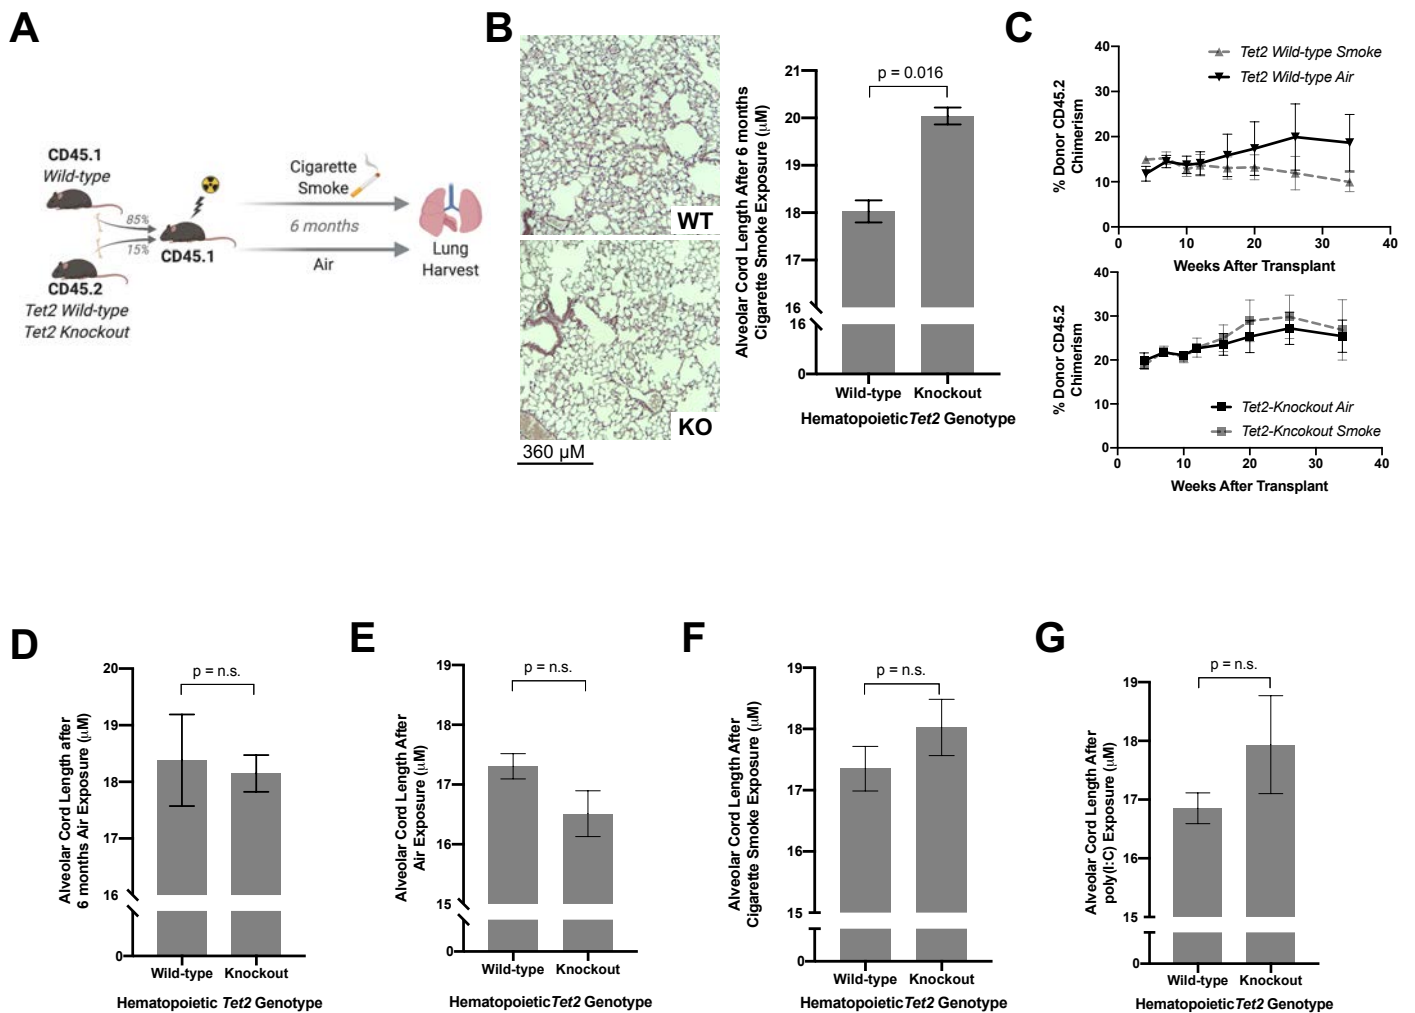

**Figure S9. Single Cell RNA-Sequencing Data in Mouse Model of COPD and CHIP.**

A) Balloon plot showing the expression of selected marker genes across different populations identified using single-cell RNA-sequencing.

B) Frequency of non-hematopoietic, natural killer, myeloid, B-lymphoid, and T/NK-T Lymphoid cells recovered per mouse (n=4 for *Tet2*-wild-type Air, *Tet2*-mutant Air, *Tet2*-mutant CS/ poly(I:C), and n=3 for *Tet2*-wild-type CS/ poly(I:C)). Error bars represent the SEM.

C) Assessment of 50 Hallmark signature scores of mice exposed to cigarette smoke and poly(I:C) across all cells. A positive value (blue) represents higher scores in *Tet2*-wild-type and negative value (orange) reflects higher scores in *Tet2*-knockout. Shown are the five signatures most enriched in each genotype. The P-values were calculated using a Wilcoxin test and adjusted using a Bonferroni correction.

D) Gene set enrichment analysis using Hallmark interferon- $\alpha$  (top) and interferon- $\gamma$  (bottom) signatures comparing *Tet2*-knockout to *Tet2*-wild-type cells across the different clusters of cells in mice exposed to cigarette smoke and poly(I:C).

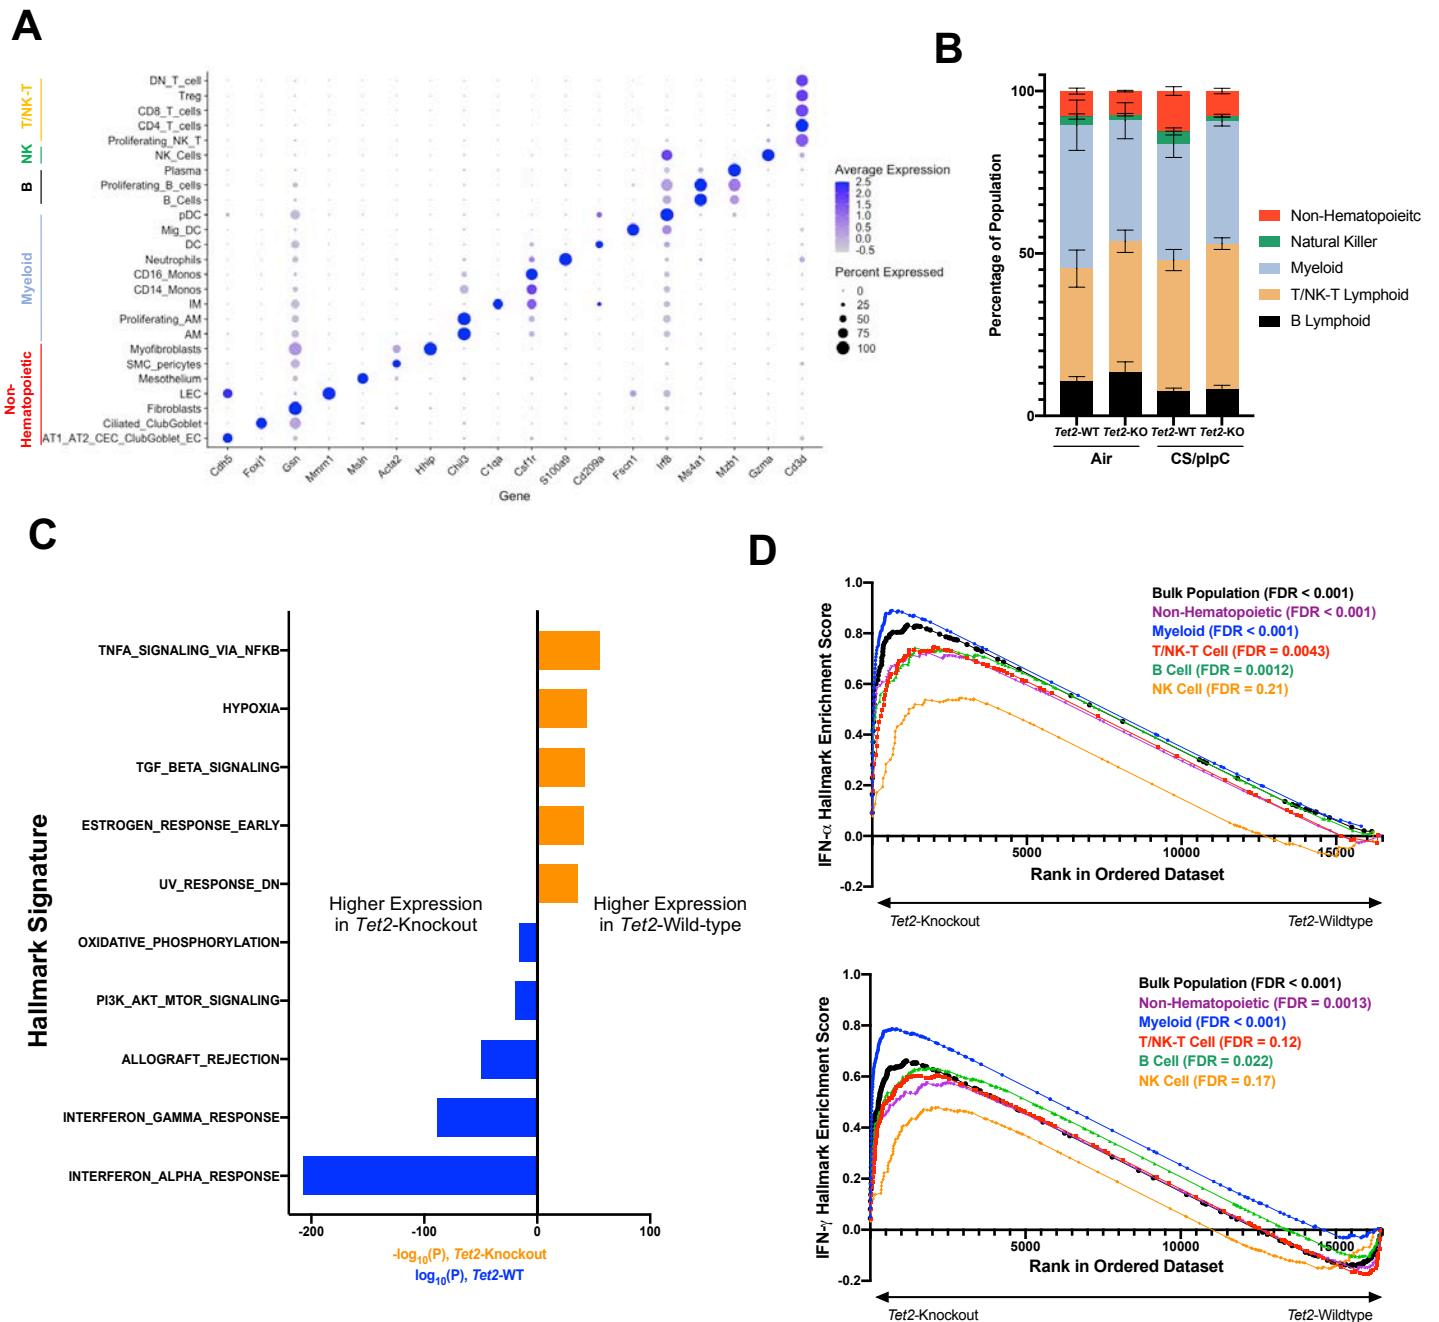

## Figure S10. Single Cell RNA-Sequencing and In Vitro Macrophage Analysis.

A) Balloon plot showing expression of interferon- $\gamma$  across all cell types as detected in the scRNA-seq from the lungs of mice exposed to cigarette smoke and poly(I:C). Interferon Type I cytokines were below the detection limit of scRNA-seq.

B) Balloon plot showing expression of tumor growth factor beta (Tgfb) isoforms across all cell types in the lungs of mice exposed to cigarette smoke and poly(I:C).

C) Ratio of cytokine levels between *Tet2*-knockout and *Tet2*-wild-type pulmonary macrophages grown in vitro then exposed to poly(I:C) for 24 hours. Shown in red are cytokines that are significantly higher in cultures of *Tet2*-knockout compared to *Tet2*-wild-type pulmonary macrophages.

D) A signature comprised of the seven cytokines detected at significantly higher levels from *Tet2*-knockout pulmonary macrophages (shown in F) was assessed in the single cell transcriptional data in the monocyte/macrophage cells (CD14<sup>+</sup> monocytes, CD16<sup>+</sup> monocytes, interstitial macrophages, alveolar macrophages, and proliferating alveolar macrophages) from *Tet2*-wild-type and *Tet2*-knockout lungs in mice exposed to cigarette smoke and poly(I:C). A negative value (orange) reflects higher scores in *Tet2*-knockout. The adjusted P-values were adjusted using a Bonferroni correction.

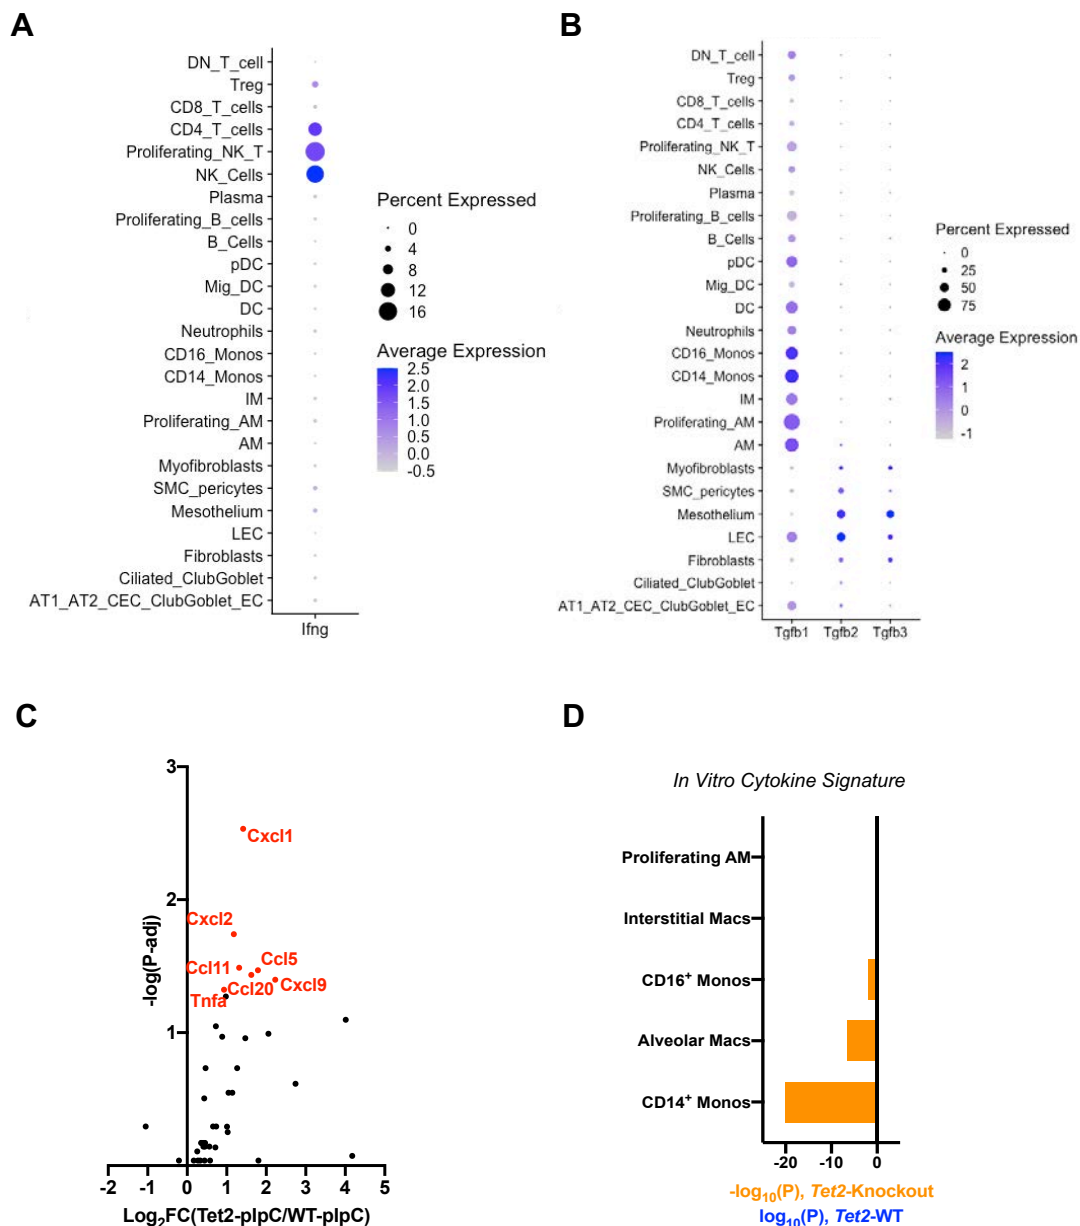

**Table S1. Detailed Cohort Characteristics**

| Cohorts            | N             | # CHIP       | # GOLD 1     | # COPD (GOLD 2-4) | # COPD (GOLD 3-4) | # Controls (GOLD 0) | Age (SD)           | #Smokers      | # Pack-years (SD)  | FEV1% predicted (SD) |
|--------------------|---------------|--------------|--------------|-------------------|-------------------|---------------------|--------------------|---------------|--------------------|----------------------|
| <b>COPDGene</b>    | <b>8,395</b>  | <b>478</b>   | <b>710</b>   | <b>3,421</b>      | <b>1,698</b>      | <b>3,085</b>        | <b>59.5 (9.1)</b>  | <b>8,395</b>  | <b>44.3 (25.0)</b> | <b>73 (25.6)</b>     |
| <b>TOPMed</b>      | <b>11,269</b> | <b>566</b>   | <b>1,076</b> | <b>2,282</b>      | <b>945</b>        | <b>6,878</b>        | <b>59.9 (11.0)</b> | <b>6,515</b>  | <b>16.1 (24.7)</b> | <b>87.7 (23.0)</b>   |
| ARIC               | 3,010         | 134          | 405          | 443               | 67                | 1,929               | 57.1 (5.8)         | 1,890         | 18.9 (23.5)        | 91.2 (17.1)          |
| CFS                | 573           | 14           | 17           | 50                | 15                | 412                 | 47.2 (15.5)        | 339           | 10.9 (16.5)        | 91.0 (20.2)          |
| ECLIPSE            | 1,440         | 116          | 14           | 1,247             | 789               | 165                 | 62.6 (7.7)         | 1,440         | 47.0 (28.3)        | 52.6 (23.2)          |
| FHS                | 1,134         | 98           | 235          | 152               | 13                | 694                 | 67.0 (8.6)         | 644           | 3.8 (14.1)         | 96.1 (19.1)          |
| JHS                | 2,365         | 84           | 48           | 120               | 27                | 1,822               | 55.0 (12.5)        | 761           | 7.1 (16.0)         | 92.4 (17.5)          |
| MESA               | 2,747         | 120          | 357          | 270               | 34                | 1,856               | 65.3 (9.7)         | 1,441         | 10.5 (21.3)        | 94.2 (17.8)          |
| <b>ICGN-EOCOPD</b> | <b>1,554</b>  | <b>92</b>    | <b>24</b>    | <b>1,282</b>      | <b>853</b>        | <b>216</b>          | <b>55.8 (11.0)</b> | <b>1,462</b>  | <b>42.0 (26.7)</b> | <b>47.7 (26.8)</b>   |
| <b>UK Biobank</b>  | <b>27,617</b> | <b>1,588</b> | <b>2,217</b> | <b>1,459</b>      | <b>149</b>        | <b>23,941</b>       | <b>56.8 (7.8)</b>  | <b>12,321</b> | <b>6.2 (13.12)</b> | <b>100.8 (16.6)</b>  |
| <b>Total</b>       | <b>48,835</b> | <b>2,724</b> | <b>4,027</b> | <b>8,444</b>      | <b>3,645</b>      | <b>34,093</b>       | <b>57.9 (9.1)</b>  | <b>28,693</b> | <b>16.1 (24.1)</b> | <b>91.3 (24.2)</b>   |

**Table S2. Covariate information between COPD cases (GOLD 2-4) and controls for each study.** UK Biobank coded pack-years as NA if quit before age 16 (recoded a 0 for these analyses) or as 0 if total smoking duration <1 year. Median (IQR) are shown for age and pack-years.

| study       | #female in case (%) | #female in control (%) | #smokers in case (%) | #smokers in control (5) |
|-------------|---------------------|------------------------|----------------------|-------------------------|
| COPDGene    | 1526(28.7)          | 1462(29.4)             | 3421(64.4)           | 3085(62)                |
| ARIC        | 194(17.9)           | 1058(41.2)             | 390(36.1)            | 1024(39.9)              |
| CFS         | 21(13)              | 217(41.5)              | 40(24.8)             | 228(43.6)               |
| FHS         | 82(18.6)            | 408(41.5)              | 124(28.2)            | 342(34.8)               |
| JHS         | 56(10.3)            | 1185(52.8)             | 62(11.4)             | 542(24.1)               |
| MESA        | 112(12.6)           | 996(40.2)              | 201(22.6)            | 888(35.8)               |
| ECLIPSE     | 437(34.3)           | 71(36.8)               | 1247(97.8)           | 165(85.5)               |
| ICGN-EOCOPD | 672(52.4)           | 97(44.9)               | 1268(98.9)           | 152(70.4)               |
| UK Biobank  | 656(50.0)           | 13650(57.0)            | 920(63.1%)           | 10205(42.6%)            |

| study       | age in case     | age in control  | packyears in case | packyears in control |
|-------------|-----------------|-----------------|-------------------|----------------------|
| COPDGene    | 63(56-69)       | 54(49-61)       | 46(34-66)         | 33.8(22.6-44.1)      |
| ARIC        | 60(56-64)       | 57(53-63)       | 37.8(19.3-50.7)   | 0.5(0-21)            |
| CFS         | 57.8(47.9-67.5) | 42.4(32.3-52.6) | 27.9(1.7-42.7)    | 0.6(0-11.9)          |
| FHS         | 68.3(62.2-74.8) | 66(60.3-72.8)   | 0(0-9.3)          | 0(0-0)               |
| JHS         | 62.1(54.1-70.7) | 54.8(44.5-64)   | 5.1(0-25.2)       | 0(0-4.3)             |
| MESA        | 65(57.2-71)     | 59(52-67)       | 13.9(0-35.4)      | 0(0-7.3)             |
| ECLIPSE     | 64(59-69)       | 56(47-61)       | 44(30-60)         | 28(19-41)            |
| ICGN-EOCOPD | 57.2(50.8-63.4) | 50.5(34.7-58.3) | 57.2(29.9-58.5)   | 17.7(0-30.2)         |
| UK Biobank  | 61(55-65)       | 57(50-63)       | 21.3(5-38)*       | 7.5(0-19.5)*         |

**Table S3. Prevalence of CHIP across COPD status and cohorts.**

| <b>Cohorts</b>    | <b># GOLD 2-4 cases with CHIP / # GOLD 2-4 cases (%)</b> | <b># GOLD 3-4 cases with CHIP / # GOLD 3-4 cases (%)</b> | <b># controls with CHIP / # controls (%)</b> |
|-------------------|----------------------------------------------------------|----------------------------------------------------------|----------------------------------------------|
| <b>COPDGene</b>   | 269/3421 (7.86%)                                         | 164/1698 (9.66%)                                         | 115/3085 (3.73%)                             |
| <b>TOPMed</b>     | 269/3421 (7.86%)                                         | 164/1698 (9.66%)                                         | 115/3085 (3.73%)                             |
| ARIC              | 33/443 (7.45%)                                           | 5/67 (7.46%)                                             | 78/1929 (4.04%)                              |
| CFS               | 3/50 (6%)                                                | 0/15 (0%)                                                | 8/412 (1.94%)                                |
| ECLIPSE           | 105/1247 (8.42%)                                         | 74/789 (9.38%)                                           | 7/165 (4.24%)                                |
| FHS               | 14/152 (9.21%)                                           | 1/13 (7.69%)                                             | 58/694 (8.36%)                               |
| JHS               | 10/120 (8.33%)                                           | 3/27 (11.11%)                                            | 57/1822 (3.13%)                              |
| MESA              | 17/270 (6.3%)                                            | 1/34 (2.94%)                                             | 74/1856 (3.99%)                              |
| <b>ICGN-EOCPD</b> | 77/1282 (6.01%)                                          | 59/853 (6.92%)                                           | 10/216 (4.63%)                               |
| <b>UK Biobank</b> | 122/1459 (8.36%)                                         | 16/149 (10.74%)                                          | 1299/23941 (5.43%)                           |

**Table S4. Association between CHIP and COPD-related phenotypes in the COPDGene study.**

\*The 95% CI has been adjusted for the six phenotypes examined using the primary cohort.

†P-values presented are two-sided and are raw. They should be compared with the significance level  $0.05/6 = 0.00833$ .

| <b>Phenotype</b>                     | <b>Effect size estimate (adjusted 95% CI*)</b> | <b>P-value†</b> |
|--------------------------------------|------------------------------------------------|-----------------|
| # Pack-years                         | 1.001 (0.996 - 1.005)                          | 0.75            |
| COPD GOLD 2-4 in all subjects        | 1.589 (1.138 - 2.22)                           | 0.0003          |
| GOLD 3-4 in GOLD 2-4 subjects        | 1.631 (1.105 - 2.406)                          | 0.0009          |
| GOLD 3-4 in all subjects             | 2.163 (1.471 - 3.181)                          | <0.0001         |
| FEV1% predicted in all subjects      | -5.762 (-8.729 - -2.795)                       | <0.0001         |
| FEV1% predicted in GOLD 2-4 subjects | -2.576 (-5.128 - 0.024)                        | 0.0078          |

**Table S5. Association between CHIP and COPD after adjusting for possible confounders in COPDGene**

| Independent variables                                                                                                                                                         | Original Model |        | Model 1 |          | Model 2 |          | Model 3 |          | Model 4 |          |
|-------------------------------------------------------------------------------------------------------------------------------------------------------------------------------|----------------|--------|---------|----------|---------|----------|---------|----------|---------|----------|
|                                                                                                                                                                               | OR             | P      | OR      | P        | OR      | P        | OR      | P        | OR      | P        |
| CHIP                                                                                                                                                                          | 1.59           | 0.0003 | 1.61    | 0.0002   | 1.54    | 0.0007   | 1.56    | 0.0005   | 1.53    | 0.001    |
| <b>Cancer Comorbidities</b>                                                                                                                                                   |                |        |         |          |         |          |         |          |         |          |
| Lung cancer                                                                                                                                                                   |                |        | 2.97    | 3.34E-06 |         |          |         |          | 2.87    | 8.70E-06 |
| Breast cancer                                                                                                                                                                 |                |        | 0.79    | 0.24     |         |          |         |          | 0.82    | 0.34     |
| Prostate cancer                                                                                                                                                               |                |        | 0.99    | 0.98     |         |          |         |          | 1.08    | 0.72     |
| Colon cancer                                                                                                                                                                  |                |        | 0.89    | 0.77     |         |          |         |          | 0.97    | 0.93     |
| Bladder cancer                                                                                                                                                                |                |        | 1.13    | 0.8      |         |          |         |          | 1.18    | 0.72     |
| <b>Cardiovascular comorbidities</b>                                                                                                                                           |                |        |         |          |         |          |         |          |         |          |
| Heart attack                                                                                                                                                                  |                |        |         |          | 1.53    | 0.0055   |         |          | 1.51    | 0.0082   |
| Congestive Heart Failure                                                                                                                                                      |                |        |         |          | 3.08    | 5.98E-09 |         |          | 3.01    | 1.76E-08 |
| Angina                                                                                                                                                                        |                |        |         |          | 1.06    | 0.74     |         |          | 1.06    | 0.7      |
| Coronary artery disease                                                                                                                                                       |                |        |         |          | 0.84    | 0.25     |         |          | 8.28    | 0.21     |
| Stroke                                                                                                                                                                        |                |        |         |          | 1.4     | 0.08     |         |          | 1.41    | 0.08     |
| <b>Socioeconomic status</b>                                                                                                                                                   |                |        |         |          |         |          |         |          |         |          |
| Highest levels of school                                                                                                                                                      |                |        |         |          |         |          | 0.78    | 6.87E-22 | 0.78    | < 2e-16  |
| Original model: COPD ~ CHIP + age + age2 + sex + sequencing center + 10 PCs + pack-years                                                                                      |                |        |         |          |         |          |         |          |         |          |
| Model 1: COPD ~ CHIP + lung cancer + age + age2 + sex + sequencing center + 10 PCs + pack-years                                                                               |                |        |         |          |         |          |         |          |         |          |
| Model 2: COPD ~ CHIP + CVD composite score + age + age2 + sex + sequencing center + 10 PCs + pack-years                                                                       |                |        |         |          |         |          |         |          |         |          |
| Model 3: COPD ~ CHIP + Townsend deprivation index + highest levels of school + age + age2 + sex + sequencing center + 10 PCs + pack-years                                     |                |        |         |          |         |          |         |          |         |          |
| Model 4: COPD ~ CHIP + lung cancer + CVD composite score + Townsend deprivation index + highest levels of school + age + age2 + sex + sequencing center + 10 PCs + pack-years |                |        |         |          |         |          |         |          |         |          |



**Table S6. Association between CHIP driver genes and COPD in the COPDGene dataset.**

*\* The 95% CI has been adjusted for the multiple testing of nine genes*

| GOLD 2-4 |                                                       |                                          |              |                             |         |
|----------|-------------------------------------------------------|------------------------------------------|--------------|-----------------------------|---------|
| GENE     | # GOLD 2-4 cases with mutation / # GOLD 2-4 cases (%) | # controls with mutation/ # controls (%) | OR (GOLD2-4) | Adjusted 95% CI (GOLD 2-4)* | P-value |
| DNMT3A   | 125/3277(3.8%)                                        | 73/3043(2.4%)                            | 1.40         | 0.88 - 2.21                 | 0.043   |
| ASXL1    | 33/3185(1%)                                           | 15/2985(0.5%)                            | 1.23         | 0.48 - 3.14                 | 0.541   |
| SRSF2    | 10/3162(0.3%)                                         | 2/2972(0.1%)                             | 2.39         | 0.27 - 21.27                | 0.269   |
| TET2     | 46/3198(1.4%)                                         | 8/2978(0.3%)                             | 3.49         | 1.1 - 11.03                 | 0.003   |
| GNAS     | 1/3153(0%)                                            | 2/2972(0.1%)                             | 0.56         | 0.02 - 19.56                | 0.649   |
| JAK2     | 5/3157(0.2%)                                          | 1/2971(0%)                               | 2.43         | 0.11 - 54.8                 | 0.429   |
| TP53     | 5/3157(0.2%)                                          | 1/2971(0%)                               | 2.51         | 0.1 - 60.26                 | 0.422   |
| SF3B1    | 11/3163(0.3%)                                         | 0/2970(0%)                               | 163990.23    | NA                          | 0.938   |
| PPM1D    | 6/3158(0.2%)                                          | 6/2976(0.2%)                             | 0.64         | 0.12 - 3.41                 | 0.459   |

| GOLD 3-4 |                                                       |                                          |               |                             |         |
|----------|-------------------------------------------------------|------------------------------------------|---------------|-----------------------------|---------|
| GENE     | # GOLD 3-4 cases with mutation / # GOLD 3-4 cases (%) | # controls with mutation/ # controls (%) | OR (GOLD 3-4) | Adjusted 95% CI (GOLD 3-4)* | P-value |
| DNMT3A   | 70/1604(4.4%)                                         | 73/3043(2.4%)                            | 1.77          | 1.03 - 3.06                 | 0.004   |
| ASXL1    | 20/1554(1.3%)                                         | 15/2985(0.5%)                            | 1.86          | 0.64 - 5.42                 | 0.108   |
| SRSF2    | 8/1542(0.5%)                                          | 2/2972(0.1%)                             | 4.59          | 0.46 - 45.65                | 0.066   |
| TET2     | 27/1561(1.7%)                                         | 8/2978(0.3%)                             | 3.68          | 1.01 - 13.42                | 0.005   |
| GNAS     | 1/1535(0.1%)                                          | 2/2972(0.1%)                             | 1.95          | 0.05 - 70.41                | 0.606   |
| JAK2     | 4/1538(0.3%)                                          | 1/2971(0%)                               | 6.72          | 0.25 - 178.94               | 0.107   |
| TP53     | 3/1537(0.2%)                                          | 1/2971(0%)                               | 4.26          | 0.11 - 171.69               | 0.277   |
| SF3B1    | 9/1543(0.6%)                                          | 0/2970(0%)                               | 1254894.90    | NA                          | 0.959   |
| PPM1D    | 6/1540(0.4%)                                          | 6/2976(0.2%)                             | 1.01          | 0.18 - 5.58                 | 0.983   |

**Table S7. Association between CHIP and COPD-related phenotypes in the meta-analyses of TOPMed cohorts.**

\*P-values presented are two-sided.

| <b>Phenotype</b>                     | <b>Effect size estimate (95% CI)</b> | <b>P-value</b> |
|--------------------------------------|--------------------------------------|----------------|
| # Pack-years                         | 1.007 (1.003 - 1.01)                 | 0.001          |
| COPD GOLD 2-4 in all subjects        | 1.320 (0.993 - 1.753)                | 0.06           |
| GOLD 3-4 in GOLD 2-4 subjects        | 1.385 (0.935 - 2.052)                | 0.10           |
| GOLD 3-4 in all subjects             | 1.423 (0.799 - 2.533)                | 0.23           |
| FEV1% predicted in all subjects      | -0.701 (-2.207 - 0.805)              | 0.36           |
| FEV1% predicted in GOLD 2-4 subjects | -1.215 (-3.688 - 1.259)              | 0.33           |

**Table S8. Association between CHIP and COPD-related phenotypes in the UK Biobank data.**

\*P-values presented are two-sided.

| <b>Phenotype</b>                     | <b>Effect size estimate (95% CI)</b> | <b>P-value</b> |
|--------------------------------------|--------------------------------------|----------------|
| # Pack-years                         | 1.003 (0.999 - 1.007)                | 0.14           |
| COPD GOLD 2-4 in all subjects        | 1.26 (1.03 - 1.54)                   | 0.025          |
| GOLD 3-4 in GOLD 2-4 subjects        | 1.30 (0.74 - 2.28)                   | 0.37           |
| GOLD 3-4 in all subjects             | 1.58 (0.93 - 2.69)                   | 0.09           |
| FEV1% predicted in all subjects      | -0.79 (-1.623 - 0.043)               | 0.06           |
| FEV1% predicted in GOLD 2-4 subjects | -1.449 (-3.557 - 0.658)              | 0.18           |

**Table S9. Association between CHIP and COPD-related phenotypes in the ICGN-EOCOPD dataset.**

\*P-values presented are two-sided.

| <b>Phenotype</b>                     | <b>Effect size estimate (95% CI)</b> | <b>P-value</b> |
|--------------------------------------|--------------------------------------|----------------|
| # Pack-years                         | 1.002 (0.993 - 1.011)                | 0.677          |
| COPD GOLD 2-4 in all subjects        | 1.041 (0.455 - 2.385)                | 0.924          |
| GOLD 3-4 in GOLD 2-4 subjects        | 1.403 (0.829 - 2.376)                | 0.207          |
| GOLD 3-4 in all subjects             | 1.162 (0.494 - 2.733)                | 0.731          |
| FEV1% predicted in all subjects      | -6.372 (-11.587 - -1.157)            | 0.017          |
| FEV1% predicted in GOLD 2-4 subjects | -4.953 (-9.076 - -0.83)              | 0.019          |

**Table S10. Association between CHIP and COPD after adjusting for possible confounders in UK Biobank.**

| Independent variables                                                                                                                                                    | Original Model |       | Model 1 |          | Model 2 |        | Model 3 |          | Model 4 |          |
|--------------------------------------------------------------------------------------------------------------------------------------------------------------------------|----------------|-------|---------|----------|---------|--------|---------|----------|---------|----------|
|                                                                                                                                                                          | OR             | P     | OR      | P        | OR      | P      | OR      | P        | OR      | P        |
| CHIP                                                                                                                                                                     | 1.26           | 0.025 | 1.25    | 0.029    | 1.26    | 0.025  | 1.26    | 0.026    | 1.25    | 0.03     |
| <b>Cancer Comorbidities</b>                                                                                                                                              |                |       |         |          |         |        |         |          |         |          |
| Prevalent lung cancer                                                                                                                                                    |                |       | 3.9     | 5.00E-03 |         |        |         |          | 3.66    | 8.00E-03 |
| <b>Cardiovascular comorbidities</b>                                                                                                                                      |                |       |         |          |         |        |         |          |         |          |
| Prevalence CVD Composite score*                                                                                                                                          |                |       |         |          | 1.37    | 0.0007 |         |          | 1.3     | 0.005    |
| <b>Socioeconomic status</b>                                                                                                                                              |                |       |         |          |         |        |         |          |         |          |
| Townsend deprivation index                                                                                                                                               |                |       |         |          |         |        | 1.05    | 5.19E-08 | 1.05    | 0.029    |
| Education level: A-levels                                                                                                                                                |                |       |         |          |         |        | 0.75    | 0.031    | 0.75    | 0.03     |
| Education level: College/University                                                                                                                                      |                |       |         |          |         |        | 0.94    | 0.515    | 0.95    | 0.571    |
| Education level: Professional degree                                                                                                                                     |                |       |         |          |         |        | 0.87    | 0.092    | 0.87    | 0.095    |
| Education level: Other education                                                                                                                                         |                |       |         |          |         |        | 1.18    | 4.20E-02 | 1.17    | 0.052    |
| *A composite score of CAD, MI, angina, HF, ischemic stroke                                                                                                               |                |       |         |          |         |        |         |          |         |          |
| Original model: COPD ~ CHIP + age + age2 + sex + 10 PCs + ever-smoking + pack-years                                                                                      |                |       |         |          |         |        |         |          |         |          |
| Model 1: COPD ~ CHIP + lung cancer + age + age2 + sex + 10 PCs + ever-smoking + pack-years                                                                               |                |       |         |          |         |        |         |          |         |          |
| Model 2: COPD ~ CHIP + CVD composite score + age + age2 + sex + 10 PCs + ever-smoking + pack-years                                                                       |                |       |         |          |         |        |         |          |         |          |
| Model 3: COPD ~ CHIP + Townsend deprivation index + highest levels of school + age + age2 + sex + 10 PCs + ever-smoking + pack-years                                     |                |       |         |          |         |        |         |          |         |          |
| Model 4: COPD ~ CHIP + lung cancer + CVD composite score + Townsend deprivation index + highest levels of school + age + age2 + sex + 10 PCs + ever-smoking + pack-years |                |       |         |          |         |        |         |          |         |          |

**Table S11. Association between CHIP and COPD-related phenotypes in the meta-analyses of all cohorts.**

\*P-values presented are two-sided.

| <b>Phenotype</b>                     | <b>Effect size estimate (95% CI)</b> | <b>P-value</b> |
|--------------------------------------|--------------------------------------|----------------|
| # Pack-years                         | 1.003 (1.001 - 1.005)                | 0.0037         |
| COPD GOLD 2-4 in all subjects        | 1.357 (1.185 - 1.554)                | < 0.0001       |
| GOLD 3-4 in GOLD 2-4 subjects        | 1.488 (1.219 - 1.816)                | < 0.0001       |
| GOLD 3-4 in all subjects             | 1.843 (1.474 - 2.303)                | < 0.0001       |
| FEV1% predicted in all subjects      | -1.851 (-3.523 - -0.18)              | 0.03           |
| FEV1% predicted in GOLD 2-4 subjects | -2.073 (-3.204 - -0.941)             | 0.0003         |

**Table S12. Meta-analyses results of the association between GOLD 2-4 COPD and CHIP within different strata of smoking exposure.**

| <b>Strata</b>   | <b>OR</b> | <b>95% CI</b> | <b>P-value</b> | <b>#CHIP/#Case (%)</b> | <b>#CHIP/#Cont (%)</b> |
|-----------------|-----------|---------------|----------------|------------------------|------------------------|
| Non-smokers     | 1.51      | 0.9-2.52      | 1.17E-01       | 51/771(6.61%)          | 821/17489(4.69%)       |
| Smokers         | 1.38      | 1.19-1.61     | 2.98E-05       | 597/7660(7.79%)        | 885/16631(5.32%)       |
| Current smokers | 1.19      | 0.91-1.56     | 2.09E-01       | 178/3043(5.85%)        | 177/4449(3.98%)        |
| Former smokers  | 1.47      | 1.22-1.77     | 5.79E-05       | 401/4398(9.12%)        | 710/12197(5.82%)       |
| Heavy smokers   | 1.45      | 1.17-1.8      | 7.57E-04       | 430/5404(7.96%)        | 207/3822(5.42%)        |
| Light smokers   | 1.41      | 1.04-1.9      | 2.60E-02       | 67/775(8.65%)          | 473/8752(5.4%)         |

**Table S13. Association between CHIP driver genes and COPD in the meta-analyses of all cohorts.**

\* The 95% CI has been adjusted for the multiple testing of nine genes

| <b>GOLD 2-4</b> |                      |                                    |                |
|-----------------|----------------------|------------------------------------|----------------|
| <b>GENE</b>     | <b>OR (GOLD 2-4)</b> | <b>Adjusted 95% CI (GOLD 2-4)*</b> | <b>P-value</b> |
| <i>DNMT3A</i>   | 1.30                 | 1.02 - 1.67                        | 0.003          |
| <i>ASXL1</i>    | 1.30                 | 0.73 - 2.34                        | 0.209          |
| <i>SRSF2</i>    | 2.11                 | 0.44 - 10.1                        | 0.187          |
| <i>TET2</i>     | 1.48                 | 0.87 - 2.51                        | 0.043          |
| <i>GNAS</i>     | 0.56                 | 0.02 - 19.56                       | 0.649          |
| <i>JAK2</i>     | 1.85                 | 0.35 - 9.76                        | 0.303          |
| <i>TP53</i>     | 1.79                 | 0.39 - 8.27                        | 0.291          |
| <i>SF3B1</i>    | 1.06                 | 0.17 - 6.59                        | 0.926          |
| <i>PPM1D</i>    | 1.44                 | 0.46 - 4.46                        | 0.374          |

| <b>GOLD 3-4</b> |                      |                                    |                |
|-----------------|----------------------|------------------------------------|----------------|
| <b>GENE</b>     | <b>OR (GOLD 3-4)</b> | <b>Adjusted 95% CI (GOLD 3-4)*</b> | <b>P-value</b> |
| <i>DNMT3A</i>   | 1.68                 | 1.08 - 2.63                        | 0.001          |
| <i>ASXL1</i>    | 1.95                 | 0.76 - 4.98                        | 0.048          |
| <i>SRSF2</i>    | 4.42                 | 0.51 - 38.1                        | 0.056          |
| <i>TET2</i>     | 2.41                 | 1.03 - 5.63                        | 0.004          |
| <i>GNAS</i>     | 1.95                 | 0.05 - 70.41                       | 0.606          |
| <i>JAK2</i>     | 6.72                 | 0.25 - 178.94                      | 0.107          |
| <i>TP53</i>     | 9.19                 | 1.46 - 57.72                       | 0.001          |
| <i>SF3B1</i>    | 1.43                 | 0.04 - 47.85                       | 0.777          |
| <i>PPM1D</i>    | 1.41                 | 0.36 - 5.48                        | 0.483          |



**Table S14. Association between CHIP driver genes and number of pack-years in the meta-analyses of all cohorts.**

| <b>GENE</b>          | <b>OR</b> | <b>Adjusted 95% CI</b> | <b>P-value</b> |
|----------------------|-----------|------------------------|----------------|
| <i><b>DNMT3A</b></i> | 0.086     | 0.91 - 1.31            | 0.20           |
| <i><b>ASXL1</b></i>  | -0.002    | 0.98 - 1.02            | 0.72           |
| <i><b>SRSF2</b></i>  | 0.027     | 0.99 - 1.07            | 0.08           |
| <i><b>TET2</b></i>   | 0.258     | 0.67 - 2.51            | 0.28           |
| <i><b>GNAS</b></i>   | -0.075    | 0.72 - 1.2             | 0.43           |
| <i><b>JAK2</b></i>   | -0.094    | 0.76 - 1.1             | 0.17           |
| <i><b>TP53</b></i>   | 0.002     | 0.96 - 1.04            | 0.91           |
| <i><b>SF3B1</b></i>  | -0.007    | 0.95 - 1.04            | 0.68           |
| <i><b>PPM1D</b></i>  | 0.020     | 0.98 - 1.06            | 0.16           |

**Table S15. Individual Values of Mouse Alveolar Cord Length Quantification from Cigarette Smoke (CS) and poly(I:C) Exposure Experiment**

The median cord length ( $\mu\text{M}$ ) for each mouse is listed.

| <b><i>Tet2</i> Wild-Type CS+ Poly(I:C)</b> | <b><i>Tet2</i>-Knockout CS+ Poly(I:C)</b> |
|--------------------------------------------|-------------------------------------------|
| 16.03                                      | 17.18                                     |
| 16.15                                      | 17.38                                     |
| 16.03                                      | 16.31                                     |
| 17.31                                      | 18.53                                     |
| 16.02                                      | 17.96                                     |
| 17.42                                      | 19.04                                     |
| 16.54                                      | 19.33                                     |
| 17.65                                      | 16.85                                     |
| 17.41                                      | 19.42                                     |
| 16.91                                      | 17.49                                     |

| <b><i>Tet2</i> Wild-Type Air</b> | <b><i>Tet2</i>-Knockout Air</b> | <b><i>Tet2</i> Wild-Type CS Only</b> | <b><i>Tet2</i>-Knockout CS Only</b> | <b><i>Tet2</i> Wild-Type Poly(I:C) Only</b> | <b><i>Tet2</i>-Knockout Poly(I:C) Only</b> |
|----------------------------------|---------------------------------|--------------------------------------|-------------------------------------|---------------------------------------------|--------------------------------------------|
| 17.68                            | 16.73                           | 16.96                                | 17.89                               | 17.89                                       | 17.82                                      |
| 17.30                            | 15.98                           | 17.90                                | 17.26                               | 16.66                                       | 21.14                                      |
| 16.54                            | 17.08                           | 16.53                                | 16.84                               | 16.56                                       | 17.04                                      |
| 17.71                            | 17.45                           | 18.49                                | 18.91                               | 16.70                                       | 17.32                                      |
| 17.30                            | 15.32                           | 16.88                                | 19.22                               | 16.45                                       | 16.36                                      |

**Table S16. Individual Values of Mouse Alveolar Cord Length Quantification from Six Month Cigarette Smoke Exposure Experiment**

The median cord length ( $\mu\text{M}$ ) for each mouse is listed.

| <b><i>Tet2</i> Wild-Type Air</b> | <b><i>Tet2</i>-Knockout Air</b> | <b><i>Tet2</i> Wild-Type CS</b> | <b><i>Tet2</i>-Knockout CS</b> |
|----------------------------------|---------------------------------|---------------------------------|--------------------------------|
| 15.85                            | 18.22                           | 18.31                           | 19.54                          |
| 18.71                            | 17.89                           | 18.04                           | 20.06                          |
| 17.37                            | 17.87                           | 18.55                           | 20.39                          |
| 19.51                            | 17.42                           | 17.17                           | 20.17                          |
| 20.46                            | 19.35                           | 18.06                           |                                |

**Table S17. Transcript and Gene Information from Single Cell RNA-Sequencing.**

| mouse | genotype | exposure | UMIs_mean | UMIs_min | UMIs_max | Genes_mean | Genes_min | Genes_max |
|-------|----------|----------|-----------|----------|----------|------------|-----------|-----------|
| 1     | WT       | CS.plpC  | 4223      | 2001     | 61323    | 1531       | 999       | 7127      |
| 3     | WT       | CS.plpC  | 4613      | 2001     | 67611    | 1620       | 999       | 7232      |
| 4     | WT       | CS.plpC  | 4734      | 2002     | 40843    | 1621       | 1001      | 6975      |
| 5     | Tet2     | CS.plpC  | 4089      | 1996     | 37208    | 1548       | 998       | 4881      |
| 6     | Tet2     | CS.plpC  | 4236      | 2000     | 32546    | 1574       | 999       | 6442      |
| 7     | Tet2     | CS.plpC  | 4194      | 1999     | 35689    | 1547       | 997       | 6681      |
| 8     | Tet2     | CS.plpC  | 4243      | 2004     | 40974    | 1499       | 999       | 6104      |
| 9     | WT       | Air      | 4763      | 1999     | 48126    | 1640       | 999       | 7366      |
| 10    | WT       | Air      | 4671      | 1999     | 37740    | 1572       | 998       | 4705      |
| 11    | WT       | Air      | 5137      | 2001     | 47491    | 1770       | 999       | 6512      |
| 12    | WT       | Air      | 5307      | 1999     | 42612    | 1871       | 999       | 6465      |
| 13    | Tet2     | Air      | 4515      | 2000     | 39267    | 1596       | 999       | 5650      |
| 14    | Tet2     | Air      | 4232      | 1999     | 42919    | 1484       | 999       | 5908      |
| 15    | Tet2     | Air      | 4367      | 2004     | 25921    | 1595       | 998       | 5233      |
| 16    | Tet2     | Air      | 4212      | 1998     | 28595    | 1527       | 999       | 6251      |

**Table S18. Marker Genes Identified for Each Cluster in Single Cell RNA Sequencing Data (see online)**

**Table S19. Signature scores for Hallmark Pathways tested on all cells from mice treated with cigarette smoke and poly(I:C)**

| Signature Name                             | average_WT   | average_Tet2 | Difference   | P.wilcox   | P.wilcox.bonferroni | LOG(P.wilcox.bonferroni) |
|--------------------------------------------|--------------|--------------|--------------|------------|---------------------|--------------------------|
| HALLMARK_TNFA_SIGNALING_VIA_NFKB           | 0.15263704   | 0.119324487  | -0.033312553 | 4.0464E-58 | 2.02318E-56         | 55.69396561              |
| HALLMARK_HYPOXIA                           | 0.074836068  | 0.057142306  | -0.017693762 | 2.5858E-46 | 1.2929E-44          | 43.88843636              |
| HALLMARK_TGF_BETA_SIGNALING                | 0.055354603  | 0.032697245  | -0.022657359 | 9.1837E-45 | 4.59187E-43         | 42.33801061              |
| HALLMARK_ESTROGEN_RESPONSE_EARLY           | -0.014719994 | -0.022088687 | -0.007368693 | 1.22E-43   | 6.09994E-42         | 41.21467448              |
| HALLMARK_UV_RESPONSE_DN                    | -0.02076375  | -0.033156117 | -0.012392367 | 2.6648E-38 | 1.3324E-36          | 35.87536485              |
| HALLMARK_P53_PATHWAY                       | 0.099420085  | 0.090447092  | -0.008972993 | 7.3674E-28 | 3.68371E-26         | 25.43371498              |
| HALLMARK_UV_RESPONSE_UP                    | 0.05991021   | 0.048232144  | -0.011678066 | 3.8456E-26 | 1.92278E-24         | 23.71607142              |
| HALLMARK_APOPTOSIS                         | 0.078811455  | 0.063755602  | -0.015055853 | 9.6363E-25 | 4.81814E-23         | 22.31712091              |
| HALLMARK_MYOGENESIS                        | -0.012176846 | -0.021648704 | -0.009471858 | 4.9261E-24 | 2.46304E-22         | 21.60852767              |
| HALLMARK_EPITHELIAL_MESENCHYMAL_TRANSITION | 0.016840474  | -0.001844493 | -0.018684967 | 8.3382E-23 | 4.1691E-21          | 20.37995812              |
| HALLMARK_IL6_JAK_STAT3_SIGNALING           | 0.011458067  | -0.002243789 | -0.013701856 | 1.2396E-19 | 6.19819E-18         | 17.20773487              |
| HALLMARK_WNT_BETA_CATENIN_SIGNALING        | -0.011406563 | -0.020304313 | -0.008897749 | 2.4447E-19 | 1.22237E-17         | 16.91279692              |
| HALLMARK_COAGULATION                       | 0.002608326  | -0.011945501 | -0.014553827 | 1.1114E-18 | 5.5569E-17          | 16.25516734              |
| HALLMARK_XENOBIOTIC_METABOLISM             | -0.009213917 | -0.01647749  | -0.007263573 | 1.4245E-18 | 7.12228E-17         | 16.14738078              |
| HALLMARK_ESTROGEN_RESPONSE_LATE            | -0.008019295 | -0.013370591 | -0.005351296 | 5.3947E-17 | 2.69735E-15         | 14.56906337              |
| HALLMARK_BILE_ACID_METABOLISM              | -0.006568216 | -0.011202424 | -0.004634207 | 7.2391E-17 | 3.61956E-15         | 14.44134465              |
| HALLMARK_HEME_METABOLISM                   | 0.003627469  | -0.001199039 | -0.004826508 | 1.6029E-14 | 8.01437E-13         | 12.09613039              |
| HALLMARK_UNFOLDED_PROTEIN_RESPONSE         | 0.08730158   | 0.080969196  | -0.006332384 | 3.8022E-13 | 1.9011E-11          | 10.72099463              |
| HALLMARK_ANDROGEN_RESPONSE                 | 0.013772106  | 0.00626789   | -0.007504216 | 9.931E-13  | 4.96549E-11         | 10.3040383               |
| HALLMARK_ANGIOGENESIS                      | -0.010276816 | -0.019602803 | -0.009325987 | 1.0567E-10 | 5.2833E-09          | 8.277094855              |
| HALLMARK_APICAL_SURFACE                    | -0.049454877 | -0.054794665 | -0.005339788 | 8.4411E-10 | 4.22054E-08         | 7.374631475              |
| HALLMARK_KRAS_SIGNALING_UP                 | 0.018001215  | 0.01347925   | -0.004521966 | 5.2553E-09 | 2.62767E-07         | 6.580429188              |
| HALLMARK_IL2_STAT5_SIGNALING               | 0.015806442  | 0.012124636  | -0.003681806 | 9.6837E-08 | 4.84184E-06         | 5.314989225              |
| HALLMARK_PEROXISOME                        | -0.004850805 | -0.009327331 | -0.004476525 | 3.988E-07  | 1.99398E-05         | 4.700278407              |
| HALLMARK_KRAS_SIGNALING_DN                 | -0.01280705  | -0.01407623  | -0.001269181 | 1.1354E-06 | 5.67707E-05         | 4.245875415              |
| HALLMARK_NOTCH_SIGNALING                   | -0.011847159 | -0.016141967 | -0.004294808 | 4.8069E-06 | 0.000240346         | 3.619163925              |
| HALLMARK_CHOLESTEROL_HOMEOSTASIS           | 0.024474476  | 0.018388532  | -0.006085944 | 4.9518E-06 | 0.000247591         | 3.606264861              |
| HALLMARK_PROTEIN_SECRETION                 | 0.000779095  | -0.004671248 | -0.005450342 | 1.027E-05  | 0.000513503         | 3.289457187              |
| HALLMARK_REACTIVE_OXYGEN_SPECIES_PATHWAY   | 0.040822394  | 0.033418794  | -0.007403601 | 8.3048E-05 | 0.004152375         | 2.381703421              |
| HALLMARK_INFLAMMATORY_RESPONSE             | 0.012901398  | 0.011769548  | -0.001131849 | 0.00509903 | 0.254951259         | 0.593542839              |
| HALLMARK_ADIPOGENESIS                      | 0.034031753  | 0.029958229  | -0.004073524 | 0.00873099 | 0.436549605         | 0.359966401              |
| HALLMARK_GLYCOLYSIS                        | 0.007796718  | 0.006003385  | -0.001793333 | 0.01901132 | 0.950565795         | 0.022017817              |
| HALLMARK_MITOTIC_SPINDLE                   | -0.012793528 | -0.011530431 | 0.001263097  | 0.93769681 | 1                   | 0                        |
| HALLMARK_HEDGEHOG_SIGNALING                | -0.020850349 | -0.021686413 | -0.000836063 | 0.39398264 | 1                   | 0                        |
| HALLMARK_COMPLEMENT                        | 0.086536007  | 0.084139733  | -0.002396274 | 0.73292219 | 1                   | 0                        |
| HALLMARK_MYC_TARGETS_V2                    | -0.020509116 | -0.018623519 | 0.001885597  | 0.68301341 | 1                   | 0                        |
| HALLMARK_FATTY_ACID_METABOLISM             | -0.003717563 | -0.005631575 | -0.001914012 | 0.06301535 | 1                   | 0                        |
| HALLMARK_SPERMATOGENESIS                   | -0.010851717 | -0.010282242 | 0.000569475  | 0.85636899 | 1                   | 0                        |
| HALLMARK_PANCREAS_BETA_CELLS               | -0.026601793 | -0.027622639 | -0.001020846 | 0.12187744 | 1                   | 0                        |
| HALLMARK_MTORC1_SIGNALING                  | 0.050943634  | 0.053440119  | 0.002496485  | 0.0063984  | 0.319919922         | -0.494958714             |
| HALLMARK_G2M_CHECKPOINT                    | -0.014752355 | -0.004675107 | 0.010077248  | 0.0006916  | 0.034579796         | -1.461177574             |
| HALLMARK_APICAL_JUNCTION                   | 0.059494834  | 0.061501523  | 0.002006689  | 9.7255E-06 | 0.000486274         | -3.313119191             |
| HALLMARK_E2F_TARGETS                       | -0.0350354   | -0.020963713 | 0.014071687  | 9.9189E-07 | 4.95946E-05         | -4.304565624             |
| HALLMARK_MYC_TARGETS_V1                    | 0.215534792  | 0.227712206  | 0.012177414  | 1.9119E-07 | 9.55952E-06         | -5.019563934             |
| HALLMARK_DNA_REPAIR                        | 0.002302796  | 0.008159569  | 0.005856774  | 1.2818E-07 | 6.40903E-06         | -5.193207943             |
| HALLMARK_OXIDATIVE_PHOSPHORYLATION         | 0.149396688  | 0.157939747  | 0.008543059  | 1.2518E-18 | 6.25925E-17         | -16.20347788             |
| HALLMARK_PI3K_AKT_MTOR_SIGNALING           | 0.071802188  | 0.080881931  | 0.009079743  | 1.1358E-21 | 5.67912E-20         | -19.24571902             |
| HALLMARK_ALLOGRAFT_REJECTION               | 0.156665907  | 0.173746869  | 0.017080962  | 5.699E-52  | 2.84951E-50         | -49.54523049             |
| HALLMARK_INTERFERON_GAMMA_RESPONSE         | 0.050613795  | 0.073757024  | 0.023143229  | 4.3791E-91 | 2.18957E-89         | -88.65964158             |
| HALLMARK_INTERFERON_ALPHA_RESPONSE         | 0.019333637  | 0.060436802  | 0.041103165  | 5.876E-210 | 2.938E-208          | -207.5319419             |

**Table S20. Signature scores for Interferon and TGF Beta pathways tested on all cells from mice treated with cigarette smoke and poly(I:C)**

| Signature Name                                       | Nick Name                        | average_WT   | average_Tet2 | Difference   | P.wilcox    | P.wilcox.bonferroni | LOG(P.wilcox.bonferroni) |
|------------------------------------------------------|----------------------------------|--------------|--------------|--------------|-------------|---------------------|--------------------------|
| HALLMARK_INTERFERON_ALPHA_RESPONSE                   | (H) IFNA RESPONSE                | 0.009539031  | 0.051534216  | 0.041995185  | 3.46E-201   | 5.50E-199           | -198.2600283             |
| HALLMARK_INTERFERON_GAMMA_RESPONSE                   | (H) IFNG RESPONSE                | 0.046249155  | 0.069647796  | 0.023398641  | 8.15E-88    | 1.30E-85            | -84.88771144             |
| REACTOME_INTERFERON_ALPHA_BETA_SIGNALING             | (R) IFNA/B SIGNALING             | -0.043004346 | -0.00483522  | 0.038169125  | 3.90E-76    | 6.20E-74            | -73.20778778             |
| WP_TYPE_III_INTERFERON_SIGNALING                     | (W) TYPEIII IFN SIGNALING        | -0.097786898 | -0.052024354 | 0.045762545  | 3.36E-37    | 5.35E-35            | -34.27178508             |
| BIOCARTA_IFNA_PATHWAY                                | (B) IFNA PATHWAY                 | -0.068852889 | -0.032336253 | 0.036516636  | 4.91E-28    | 7.80E-26            | -25.10763465             |
| REACTOME_INTERFERON_SIGNALING                        | (R) IFN SIGNALING                | 0.090186061  | 0.099607919  | 0.009421857  | 3.91E-23    | 6.21E-21            | -20.20689688             |
| REACTOME_INTERFERON_GAMMA_SIGNALING                  | (R) IFNG SIGNALING               | 0.018507323  | 0.028341095  | 0.009833772  | 3.18E-14    | 5.05E-12            | -11.29658745             |
| REACTOME_REGULATION_OF_IFNA_SIGNALING                | (R) REGULATION IFNA SIGNALING    | -0.09544761  | -0.076726056 | 0.018721554  | 2.77E-11    | 4.41E-09            | -8.355995941             |
| WP_TYPE_II_INTERFERON_SIGNALING_IFNG                 | (W) TYPEII IFN SIGNALING         | -0.068098181 | -0.049877448 | 0.018220733  | 9.11E-09    | 1.45E-06            | -5.838989413             |
| WP_INTERFERON_TYPE_I_SIGNALING_PATHWAYS              | (W) IFN TYPEI SIGNALING          | 0.097370352  | 0.105241829  | 0.007871476  | 1.26E-07    | 2.00E-05            | -4.698466724             |
| BIOCARTA_IFNG_PATHWAY                                | (B) IFNG PATHWAY                 | 0.022326573  | 0.029380759  | 0.007054186  | 0.143309263 | 1                   | 0                        |
| REACTOME_REGULATION_OF_IFNG_SIGNALING                | (R) REGULATION IFNG SIGNALING    | -0.077870433 | -0.080470056 | -0.002599623 | 0.561017289 | 1                   | 0                        |
| PID_IFNG_PATHWAY                                     | (P) IFNG PATHWAY                 | 0.024161919  | 0.016622801  | -0.007539117 | 7.40E-04    | 0.117667785         | 0.929342423              |
| PID_TGFBR_PATHWAY                                    | (P) TGFBR PATHWAY                | -0.021995654 | -0.032366588 | -0.010370934 | 1.86E-15    | 2.96E-13            | 12.52822503              |
| WP_TGFBETA_SIGNALING_PATHWAY                         | (W) TGFB SIGNALING PATHWAY       | 0.065712055  | 0.053647369  | -0.012064687 | 4.37E-26    | 6.95E-24            | 23.15818414              |
| BIOCARTA_TGFB_PATHWAY                                | (B) TGFB PATHWAY                 | -0.08217898  | -0.102424268 | -0.020245289 | 2.68E-27    | 4.25E-25            | 24.37117483              |
| WP_CANONICAL_AND_NONCANONICAL_TGFB_SIGNALING         | (W) NON-CANONICAL TGFB SIGNALING | -0.052243522 | -0.06967806  | -0.017434539 | 1.03E-29    | 1.64E-27            | 26.78564317              |
| KEGG_TGF_BETA_SIGNALING_PATHWAY                      | (K) TGFB SIGNALING               | 7.45E-04     | -0.011999715 | -0.012745088 | 1.03E-31    | 1.64E-29            | 28.78476008              |
| REACTOME_TGF_BETA_RECEPTOR_SIGNALING_ACTIVATES_SMADS | (R) TGFB SIGNALING SMADS         | 0.151720747  | 0.131327138  | -0.020393609 | 3.97E-33    | 6.32E-31            | 30.19950871              |
| REACTOME_SIGNALING_BY_TGF_BETA_RECEPTOR_COMPLEX      | (R) SIGNALING BY TGFBR           | 0.128386448  | 0.115148544  | -0.013237904 | 2.03E-33    | 3.22E-31            | 30.49192525              |
| WP_TGFBETA_RECEPTOR_SIGNALING                        | (W) TGFBR SIGNALING              | -0.017335748 | -0.038149897 | -0.020814149 | 1.69E-37    | 2.69E-35            | 34.56972972              |
| REACTOME_SIGNALING_BY_TGFB_FAMILY_MEMBERS            | (R) SIGNALING TGFB FAMILY        | 0.10235474   | 0.090331696  | -0.012023045 | 6.59E-42    | 1.05E-39            | 38.97946385              |
| HALLMARK_TGF_BETA_SIGNALING                          | (H) TGFB SIGNALING               | 0.054100435  | 0.03108239   | -0.023018045 | 5.69E-44    | 9.04E-42            | 41.04376195              |

**Table 21. List of CHIP-Associated Somatic Variants Identified in the Cohort**

| Gene  | Chromosome | Position | Reference               | Alternate | Consequence | Variant Allele Fraction | Cohort                      |
|-------|------------|----------|-------------------------|-----------|-------------|-------------------------|-----------------------------|
| ASXL1 | 20         | 32436944 | G                       | A         | W1411X      | 0.22                    | Additional TOPMED - FHS     |
| ASXL1 | 20         | 32436833 | T                       | TG        | V1374fs     | 0.16                    | COPDGene                    |
| ASXL1 | 20         | 32436652 | C                       | CT        | Q1315fs     | 0.15                    | UK Biobank                  |
| ASXL1 | 20         | 32436445 | G                       | T         | E1245X      | 0.12                    | Additional TOPMED - ECLIPSE |
| ASXL1 | 20         | 32436439 | C                       | T         | Q1243X      | 0.12                    | Additional TOPMED - ARIC    |
| ASXL1 | 20         | 32436421 | TC                      | T         | F1238fs     | 0.38                    | UK Biobank                  |
| ASXL1 | 20         | 32436149 | C                       | A         | S1146*      | 0.06                    | UK Biobank                  |
| ASXL1 | 20         | 32435860 | A                       | AT        | M1050fs     | 0.16                    | COPDGene                    |
| ASXL1 | 20         | 32435827 | C                       | T         | Q1039*      | 0.12                    | UK Biobank                  |
| ASXL1 | 20         | 32435814 | AC                      | A         | N1036fs     | 0.04                    | UK Biobank                  |
| ASXL1 | 20         | 32435731 | GGT                     | G         | G1007fs     | 0.21                    | UK Biobank                  |
| ASXL1 | 20         | 32435641 | C                       | T         | Q977*       | 0.06                    | UK Biobank                  |
| ASXL1 | 20         | 32435638 | C                       | T         | Q976X       | 0.36                    | COPDGene                    |
| ASXL1 | 20         | 32435605 | C                       | T         | R965*       | 0.10                    | UK Biobank                  |
| ASXL1 | 20         | 32435605 | C                       | T         | R965X       | 0.34                    | COPDGene                    |
| ASXL1 | 20         | 32435600 | CA                      | C         | P963fs      | 0.15                    | COPDGene                    |
| ASXL1 | 20         | 32435554 | G                       | T         | E948X       | 0.14                    | Additional TOPMED - ARIC    |
| ASXL1 | 20         | 32435551 | G                       | T         | E947X       | 0.14                    | Additional TOPMED - MESA    |
| ASXL1 | 20         | 32435543 | T                       | A         | L944*       | 0.03                    | UK Biobank                  |
| ASXL1 | 20         | 32435518 | AC                      | A         | T936fs      | 0.23                    | COPDGene                    |
| ASXL1 | 20         | 32435440 | C                       | T         | Q910*       | 0.03                    | UK Biobank                  |
| ASXL1 | 20         | 32435437 | A                       | T         | K909X       | 0.11                    | Additional TOPMED - CFS     |
| ASXL1 | 20         | 32435436 | G                       | GA        | Q910fs      | 0.06                    | UK Biobank                  |
| ASXL1 | 20         | 32435390 | AC                      | A         | N893fs      | 0.33                    | UK Biobank                  |
| ASXL1 | 20         | 32435356 | C                       | T         | Q882*       | 0.30                    | UK Biobank                  |
| ASXL1 | 20         | 32435356 | C                       | T         | Q882*       | 0.11                    | UK Biobank                  |
| ASXL1 | 20         | 32435356 | C                       | T         | Q882X       | 0.17                    | COPDGene                    |
| ASXL1 | 20         | 32435356 | C                       | T         | Q882X       | 0.11                    | Additional TOPMED - MESA    |
| ASXL1 | 20         | 32435349 | T                       | TA        | D879fs      | 0.12                    | Additional TOPMED - FHS     |
| ASXL1 | 20         | 32435347 | GA                      | G         | D879fs      | 0.22                    | COPDGene                    |
| ASXL1 | 20         | 32435289 | CAG                     | C         | R860fs      | 0.29                    | Additional TOPMED - FHS     |
| ASXL1 | 20         | 32435284 | C                       | T         | Q858X       | 0.12                    | Additional TOPMED - FHS     |
| ASXL1 | 20         | 32435273 | CTGAT                   | C         | T854fs      | 0.11                    | Additional TOPMED - ECLIPSE |
| ASXL1 | 20         | 32435242 | AC                      | A         | S846fs      | 0.17                    | UK Biobank                  |
| ASXL1 | 20         | 32435242 | AC                      | A         | S846fs      | 0.13                    | UK Biobank                  |
| ASXL1 | 20         | 32435234 | TA                      | T         | V841fs      | 0.26                    | COPDGene                    |
| ASXL1 | 20         | 32435206 | GAC                     | G         | D832fs      | 0.20                    | COPDGene                    |
| ASXL1 | 20         | 32435180 | T                       | A         | L823*       | 0.09                    | UK Biobank                  |
| ASXL1 | 20         | 32435180 | T                       | G         | L823X       | 0.12                    | COPDGene                    |
| ASXL1 | 20         | 32435178 | AT                      | A         | L823X       | 0.22                    | Additional TOPMED - ARIC    |
| ASXL1 | 20         | 32435175 | T                       | TA        | T822fs      | 0.21                    | UK Biobank                  |
| ASXL1 | 20         | 32435175 | T                       | TA        | T822fs      | 0.07                    | UK Biobank                  |
| ASXL1 | 20         | 32435174 | ATACATTAGAGAAAGGAAGTGGC | A         | T822fs      | 0.10                    | UK Biobank                  |
| ASXL1 | 20         | 32435133 | TC                      | T         | P808fs      | 0.33                    | Additional TOPMED - ECLIPSE |
| ASXL1 | 20         | 32435133 | TC                      | T         | P808fs      | 0.10                    | COPDGene                    |
| ASXL1 | 20         | 32435133 | TC                      | T         | P808fs      | 0.09                    | COPDGene                    |
| ASXL1 | 20         | 32435099 | G                       | A         | W796*       | 0.10                    | UK Biobank                  |
| ASXL1 | 20         | 32435095 | TC                      | T         | S795fs      | 0.22                    | Additional TOPMED - JHS     |
| ASXL1 | 20         | 32435095 | TC                      | T         | S795fs      | 0.10                    | COPDGene                    |
| ASXL1 | 20         | 32435081 | AG                      | A         | E790fs      | 0.15                    | UK Biobank                  |
| ASXL1 | 20         | 32435079 | T                       | A         | C789X       | 0.32                    | Additional TOPMED - ECLIPSE |
| ASXL1 | 20         | 32435074 | GAATGT                  | G         | E788fs      | 0.29                    | COPDGene                    |
| ASXL1 | 20         | 32435050 | C                       | T         | Q780*       | 0.14                    | UK Biobank                  |
| ASXL1 | 20         | 32435050 | C                       | T         | Q780X       | 0.36                    | Additional TOPMED - ARIC    |
| ASXL1 | 20         | 32435036 | T                       | A         | L775X       | 0.32                    | COPDGene                    |
| ASXL1 | 20         | 32435036 | T                       | A         | L775X       | 0.21                    | Additional TOPMED - ARIC    |
| ASXL1 | 20         | 32435034 | AT                      | A         | L775X       | 0.19                    | Additional TOPMED - FHS     |
| ASXL1 | 20         | 32435014 | C                       | T         | Q768*       | 0.36                    | UK Biobank                  |
| ASXL1 | 20         | 32434993 | GC                      | G         | A761fs      | 0.17                    | COPDGene                    |
| ASXL1 | 20         | 32434990 | C                       | T         | Q760X       | 0.14                    | Additional TOPMED - ARIC    |
| ASXL1 | 20         | 32434979 | AC                      | A         | D756fs      | 0.29                    | COPDGene                    |
| ASXL1 | 20         | 32434972 | AC                      | A         | T754fs      | 0.06                    | UK Biobank                  |
| ASXL1 | 20         | 32434971 | CA                      | C         | T754fs      | 0.19                    | UK Biobank                  |
| ASXL1 | 20         | 32434968 | T                       | TC        | A752fs      | 0.13                    | Additional TOPMED - ARIC    |
| ASXL1 | 20         | 32434965 | T                       | TG        | V751fs      | 0.51                    | COPDGene                    |
| ASXL1 | 20         | 32434958 | TC                      | T         | L749fs      | 0.31                    | COPDGene                    |
| ASXL1 | 20         | 32434948 | GC                      | G         | S747fs      | 0.05                    | UK Biobank                  |
| ASXL1 | 20         | 32434934 | A                       | ATG       | G742fs      | 0.20                    | UK Biobank                  |
| ASXL1 | 20         | 32434912 | AG                      | A         | R734fs      | 0.41                    | COPDGene                    |
| ASXL1 | 20         | 32434906 | C                       | CTA       | Q733fs      | 0.09                    | UK Biobank                  |
| ASXL1 | 20         | 32434902 | C                       | A         | C730X       | 0.21                    | Additional TOPMED - ARIC    |
| ASXL1 | 20         | 32434891 | G                       | T         | E727X       | 0.13                    | COPDGene                    |
| ASXL1 | 20         | 32434888 | A                       | T         | K726X       | 0.29                    | COPDGene                    |
| ASXL1 | 20         | 32434886 | GA                      | G         | R725fs      | 0.14                    | COPDGene                    |
| ASXL1 | 20         | 32434868 | AG                      | A         | E719fs      | 0.22                    | Additional TOPMED - ECLIPSE |
| ASXL1 | 20         | 32434853 | CCA                     | C         | S714fs      | 0.48                    | Additional TOPMED - ARIC    |
| ASXL1 | 20         | 32434840 | GGAAC                   | G         | G710fs      | 0.09                    | Additional TOPMED - ARIC    |
| ASXL1 | 20         | 32434839 | CG                      | C         | G710fs      | 0.48                    | Additional TOPMED - FHS     |
| ASXL1 | 20         | 32434839 | CG                      | C         | G710fs      | 0.16                    | Additional TOPMED - FHS     |
| ASXL1 | 20         | 32434834 | C                       | T         | Q708*       | 0.06                    | UK Biobank                  |
| ASXL1 | 20         | 32434834 | C                       | T         | Q708X       | 0.20                    | Additional TOPMED - FHS     |
| ASXL1 | 20         | 32434831 | ACC                     | A         | Q708fs      | 0.28                    | UK Biobank                  |
| ASXL1 | 20         | 32434825 | G                       | G         | E705*       | 0.39                    | UK Biobank                  |
| ASXL1 | 20         | 32434825 | G                       | T         | E705X       | 0.16                    | COPDGene                    |
| ASXL1 | 20         | 32434825 | G                       | T         | E705X       | 0.09                    | Additional TOPMED - JHS     |
| ASXL1 | 20         | 32434821 | TG                      | T         | E705fs      | 0.04                    | UK Biobank                  |
| ASXL1 | 20         | 32434795 | C                       | CA        | Q695fs      | 0.20                    | COPDGene                    |
| ASXL1 | 20         | 32434795 | CA                      | C         | Q695fs      | 0.15                    | Additional TOPMED - FHS     |
| ASXL1 | 20         | 32434789 | C                       | T         | R693*       | 0.13                    | UK Biobank                  |
| ASXL1 | 20         | 32434789 | C                       | T         | R693*       | 0.11                    | UK Biobank                  |
| ASXL1 | 20         | 32434789 | C                       | T         | R693X       | 0.11                    | COPDGene                    |
| ASXL1 | 20         | 32434786 | C                       | T         | Q692X       | 0.32                    | Additional TOPMED - ARIC    |
| ASXL1 | 20         | 32434778 | C                       | G         | S689X       | 0.36                    | COPDGene                    |
| ASXL1 | 20         | 32434773 | T                       | A         | C687X       | 0.31                    | COPDGene                    |
| ASXL1 | 20         | 32434769 | AGT                     | A         | K686fs      | 0.19                    | Additional TOPMED - ECLIPSE |
| ASXL1 | 20         | 32434740 | G                       | GC        | E676fs      | 0.44                    | Additional TOPMED - FHS     |
| ASXL1 | 20         | 32434733 | A                       | ACCCTGAG  | H674fs      | 0.16                    | COPDGene                    |
| ASXL1 | 20         | 32434721 | AGG                     | A         | E670fs      | 0.13                    | COPDGene                    |
| ASXL1 | 20         | 32434681 | G                       | T         | E657*       | 0.08                    | UK Biobank                  |

| Gene  | Chromosome | Position | Reference                                           | Alternate | Consequence      | Variant Allele Fraction | Cohort                      |
|-------|------------|----------|-----------------------------------------------------|-----------|------------------|-------------------------|-----------------------------|
| ASXL1 | 20         | 32434638 | A                                                   | AG        | G642fs           | 0.57                    | Additional TOPMED - JHS     |
| ASXL1 | 20         | 32434638 | A                                                   | AG        | G642fs           | 0.56                    | COPDGene                    |
| ASXL1 | 20         | 32434638 | A                                                   | AG        | G642fs           | 0.54                    | COPDGene                    |
| ASXL1 | 20         | 32434638 | A                                                   | AG        | G642fs           | 0.54                    | Additional TOPMED - ARIC    |
| ASXL1 | 20         | 32434638 | A                                                   | AG        | G642fs           | 0.45                    | COPDGene                    |
| ASXL1 | 20         | 32434638 | A                                                   | AG        | G642fs           | 0.45                    | COPDGene                    |
| ASXL1 | 20         | 32434638 | A                                                   | AG        | G642fs           | 0.43                    | Additional TOPMED - FHS     |
| ASXL1 | 20         | 32434638 | A                                                   | AG        | G642fs           | 0.42                    | COPDGene                    |
| ASXL1 | 20         | 32434638 | A                                                   | AG        | G642fs           | 0.40                    | Additional TOPMED - ARIC    |
| ASXL1 | 20         | 32434638 | A                                                   | AG        | G642fs           | 0.40                    | COPDGene                    |
| ASXL1 | 20         | 32434638 | A                                                   | AG        | G642fs           | 0.35                    | Additional TOPMED - ARIC    |
| ASXL1 | 20         | 32434638 | A                                                   | AG        | G642fs           | 0.35                    | COPDGene                    |
| ASXL1 | 20         | 32434638 | A                                                   | AG        | G642fs           | 0.32                    | Additional TOPMED - FHS     |
| ASXL1 | 20         | 32434638 | A                                                   | AG        | G642fs           | 0.31                    | COPDGene                    |
| ASXL1 | 20         | 32434638 | A                                                   | AG        | G646fs           | 0.44                    | UK Biobank                  |
| ASXL1 | 20         | 32434638 | A                                                   | AG        | G646fs           | 0.43                    | UK Biobank                  |
| ASXL1 | 20         | 32434638 | A                                                   | AG        | G646fs           | 0.38                    | UK Biobank                  |
| ASXL1 | 20         | 32434638 | A                                                   | AG        | G646fs           | 0.37                    | UK Biobank                  |
| ASXL1 | 20         | 32434638 | A                                                   | AG        | G646fs           | 0.32                    | UK Biobank                  |
| ASXL1 | 20         | 32434638 | A                                                   | AG        | G646fs           | 0.32                    | UK Biobank                  |
| ASXL1 | 20         | 32434638 | A                                                   | AG        | G646fs           | 0.31                    | UK Biobank                  |
| ASXL1 | 20         | 32434638 | A                                                   | AG        | G646fs           | 0.31                    | UK Biobank                  |
| ASXL1 | 20         | 32434638 | A                                                   | AG        | G646fs           | 0.27                    | UK Biobank                  |
| ASXL1 | 20         | 32434638 | A                                                   | AG        | G646fs           | 0.25                    | UK Biobank                  |
| ASXL1 | 20         | 32434638 | A                                                   | AG        | G646fs           | 0.24                    | UK Biobank                  |
| ASXL1 | 20         | 32434638 | A                                                   | AG        | G646fs           | 0.21                    | UK Biobank                  |
| ASXL1 | 20         | 32434638 | A                                                   | AG        | G646fs           | 0.20                    | UK Biobank                  |
| ASXL1 | 20         | 32434638 | A                                                   | AG        | G646fs           | 0.20                    | UK Biobank                  |
| ASXL1 | 20         | 32434638 | A                                                   | AG        | G646fs           | 0.17                    | UK Biobank                  |
| ASXL1 | 20         | 32434638 | A                                                   | AG        | G646fs           | 0.17                    | UK Biobank                  |
| ASXL1 | 20         | 32434638 | A                                                   | AG        | G646fs           | 0.15                    | UK Biobank                  |
| ASXL1 | 20         | 32434638 | A                                                   | AG        | G646fs           | 0.13                    | UK Biobank                  |
| ASXL1 | 20         | 32434638 | A                                                   | AG        | G646fs           | 0.13                    | UK Biobank                  |
| ASXL1 | 20         | 32434638 | A                                                   | AG        | G646fs           | 0.10                    | UK Biobank                  |
| ASXL1 | 20         | 32434637 | G                                                   | GA        | G643fs           | 0.09                    | UK Biobank                  |
| ASXL1 | 20         | 32434637 | G                                                   | GA        | G643fs           | 0.08                    | UK Biobank                  |
| ASXL1 | 20         | 32434635 | CGGAGG                                              | C         | G644fs           | 0.20                    | UK Biobank                  |
| ASXL1 | 20         | 32434629 | TGCCATCGGAGG                                        | T         | A640fs           | 0.12                    | UK Biobank                  |
| ASXL1 | 20         | 32434628 | CTGCCATCGGAGGGGGGGT                                 | C         | T639fs           | 0.40                    | COPDGene                    |
| ASXL1 | 20         | 32434624 | ACC                                                 | A         | T638fs           | 0.20                    | COPDGene                    |
| ASXL1 | 20         | 32434612 | AGAGAGGCGGCCACCACTGCCATC                            | A         | R634fs           | 0.10                    | COPDGene                    |
| ASXL1 | 20         | 32434599 | TCACCACTGCCATAGAGAGGCGGC                            | T         | E635fs           | 0.37                    | UK Biobank                  |
| ASXL1 | 20         | 32434599 | TCACCACTGCCATAGAGAGGCGGC                            | T         | E635fs           | 0.22                    | UK Biobank                  |
| ASXL1 | 20         | 32434599 | TCACCACTGCCATAGAGAGGCGGC                            | T         | E635fs           | 0.21                    | UK Biobank                  |
| ASXL1 | 20         | 32434599 | TCACCACTGCCATAGAGAGGCGGC                            | T         | E635fs           | 0.20                    | UK Biobank                  |
| ASXL1 | 20         | 32434599 | TCACCACTGCCATAGAGAGGCGGC                            | T         | E635fs           | 0.19                    | UK Biobank                  |
| ASXL1 | 20         | 32434599 | TCACCACTGCCATAGAGAGGCGGC                            | T         | E635fs           | 0.11                    | UK Biobank                  |
| ASXL1 | 20         | 32434599 | TCACCACTGCCATAGAGAGGCGGC                            | T         | E635fs           | 0.09                    | UK Biobank                  |
| ASXL1 | 20         | 32434599 | TCACCACTGCCATAGAGAGGCGGC                            | T         | E635fs           | 0.09                    | UK Biobank                  |
| ASXL1 | 20         | 32434599 | TCACCACTGCCATAGAGAGGCGGC                            | T         | E635fs           | 0.06                    | UK Biobank                  |
| ASXL1 | 20         | 32434599 | TCACCACTGCCATAGAGAGGCGGC                            | T         | E635fs           | 0.04                    | UK Biobank                  |
| ASXL1 | 20         | 32434599 | TCACCACTGCCATAGAGAGGCGGC                            | T         | H630fs           | 0.17                    | Additional TOPMED - FHS     |
| ASXL1 | 20         | 32434599 | TCACCACTGCCATAGAGAGGCGGC                            | T         | H630fs           | 0.16                    | Additional TOPMED - ECLIPSE |
| ASXL1 | 20         | 32434599 | TCACCACTGCCATAGAGAGGCGGC                            | T         | H630fs           | 0.15                    | COPDGene                    |
| ASXL1 | 20         | 32434599 | TCACCACTGCCATAGAGAGGCGGC                            | T         | H630fs           | 0.10                    | Additional TOPMED - ARIC    |
| ASXL1 | 20         | 32434596 | AGGTCACCACCTGCCATAGAGAGGCGC                         | A         | G629fs           | 0.08                    | Additional TOPMED - ECLIPSE |
| ASXL1 | 20         | 32434579 | C                                                   | T         | Q623*            | 0.09                    | UK Biobank                  |
| ASXL1 | 20         | 32434579 | C                                                   | T         | Q623*            | 0.07                    | UK Biobank                  |
| ASXL1 | 20         | 32434562 | T                                                   | TTAAA     | I617fs           | 0.44                    | COPDGene                    |
| ASXL1 | 20         | 32434562 | T                                                   | TA        | I617fs           | 0.11                    | Additional TOPMED - ARIC    |
| ASXL1 | 20         | 32434515 | G                                                   | GGAGT     | T601fs           | 0.22                    | Additional TOPMED - FHS     |
| ASXL1 | 20         | 32434494 | C                                                   | A         | C594X            | 0.20                    | Additional TOPMED - JHS     |
| ASXL1 | 20         | 32434490 | T                                                   | TA        | I593fs           | 0.53                    | COPDGene                    |
| ASXL1 | 20         | 32434486 | C                                                   | T         | Q592X            | 0.30                    | Additional TOPMED - ARIC    |
| ASXL1 | 20         | 32434486 | C                                                   | T         | Q592X            | 0.18                    | COPDGene                    |
| ASXL1 | 20         | 32434485 | C                                                   | A         | Y591*            | 0.27                    | UK Biobank                  |
| ASXL1 | 20         | 32434485 | C                                                   | A         | Y591X            | 0.30                    | Additional TOPMED - ARIC    |
| ASXL1 | 20         | 32434485 | C                                                   | A         | Y591X            | 0.27                    | COPDGene                    |
| ASXL1 | 20         | 32434485 | C                                                   | G         | Y591X            | 0.19                    | COPDGene                    |
| ASXL1 | 20         | 32434485 | C                                                   | A         | Y591X            | 0.17                    | COPDGene                    |
| ASXL1 | 20         | 32434485 | C                                                   | G         | Y591X            | 0.13                    | Additional TOPMED - ARIC    |
| ASXL1 | 20         | 32434483 | T                                                   | TA        | Y591 Q592delinsX | 0.16                    | Additional TOPMED - ARIC    |
| ASXL1 | 20         | 32434483 | T                                                   | TA        | Y591 Q592delinsX | 0.16                    | Additional TOPMED - ECLIPSE |
| ASXL1 | 20         | 32434483 | T                                                   | TA        | Y591fs           | 0.09                    | UK Biobank                  |
| ASXL1 | 20         | 32434483 | T                                                   | TA        | Y591fs           | 0.07                    | UK Biobank                  |
| ASXL1 | 20         | 32434474 | C                                                   | T         | Q588*            | 0.15                    | UK Biobank                  |
| ASXL1 | 20         | 32434472 | G                                                   | GT        | G587fs           | 0.23                    | Additional TOPMED - ARIC    |
| ASXL1 | 20         | 32434462 | G                                                   | GT        | V584fs           | 0.06                    | Additional TOPMED - ARIC    |
| ASXL1 | 20         | 32434461 | G                                                   | A         | W583X            | 0.18                    | Additional TOPMED - FHS     |
| ASXL1 | 20         | 32434461 | G                                                   | A         | W583X            | 0.16                    | Additional TOPMED - ARIC    |
| ASXL1 | 20         | 32434460 | G                                                   | A         | W583*            | 0.15                    | UK Biobank                  |
| ASXL1 | 20         | 32434460 | G                                                   | A         | W583X            | 0.15                    | Additional TOPMED - ECLIPSE |
| ASXL1 | 20         | 32434430 | A                                                   | A         | c.1720-2A>G      | 0.33                    | Additional TOPMED - MESA    |
| ASXL1 | 20         | 32434430 | A                                                   | T         | c.e13-2A>T       | 0.10                    | UK Biobank                  |
| ASXL1 | 20         | 32433916 | G                                                   | A         | R573Q            | 0.48                    | UK Biobank                  |
| ASXL1 | 20         | 32433846 | AAC                                                 | A         | T551fs           | 0.14                    | UK Biobank                  |
| ASXL1 | 20         | 32433839 | C                                                   | CT        | R549fs           | 0.16                    | UK Biobank                  |
| ASXL1 | 20         | 32433839 | C                                                   | CT        | S547fs           | 0.36                    | COPDGene                    |
| ASXL1 | 20         | 32433829 | A                                                   | AT        | R545fs           | 0.11                    | UK Biobank                  |
| ASXL1 | 20         | 32433819 | C                                                   | CGGCTTGA  | D544fs           | 0.41                    | UK Biobank                  |
| ASXL1 | 20         | 32433807 | G                                                   | T         | E537*            | 0.33                    | UK Biobank                  |
| ASXL1 | 20         | 32433783 | C                                                   | T         | Q529*            | 0.04                    | UK Biobank                  |
| ASXL1 | 20         | 32433783 | C                                                   | T         | Q529X            | 0.27                    | Additional TOPMED - ECLIPSE |
| ASXL1 | 20         | 32433783 | C                                                   | T         | Q529X            | 0.17                    | COPDGene                    |
| ASXL1 | 20         | 32433774 | TCCCTTTGAGCAGGC GGCCTCTGCATCCCTTTCC<br>CGAAAAGAGGCC | T         | S526fs           | 0.17                    | COPDGene                    |
| ASXL1 | 20         | 32433747 | C                                                   | T         | Q517*            | 0.04                    | UK Biobank                  |
| ASXL1 | 20         | 32433739 | CTG                                                 | C         | T514fs           | 0.23                    | COPDGene                    |



| Gene   | Chromosome | Position  | Reference                                                                                                 | Alternate             | Consequence            | Variant Allele Fraction | Cohort                      |             |
|--------|------------|-----------|-----------------------------------------------------------------------------------------------------------|-----------------------|------------------------|-------------------------|-----------------------------|-------------|
| ASXL1  | 20         | 32433732  | C                                                                                                         | T                     | Q512*                  | 0.15                    | UK Biobank                  |             |
| ASXL1  | 20         | 32433732  | C                                                                                                         | T                     | Q512*                  | 0.09                    | UK Biobank                  |             |
| ASXL1  | 20         | 32433732  | C                                                                                                         | T                     | Q512*                  | 0.07                    | UK Biobank                  |             |
| ASXL1  | 20         | 32433732  | C                                                                                                         | T                     | Q512X                  | 0.20                    | Additional TOPMED - ARIC    |             |
| ASXL1  | 20         | 32433732  | C                                                                                                         | T                     | Q512X                  | 0.14                    | COVDGene                    |             |
| ASXL1  | 20         | 32433616  | C                                                                                                         | CA                    | P474fs                 | 0.07                    | UK Biobank                  |             |
| ASXL1  | 20         | 32433594  | CTG                                                                                                       | C                     | L466fs                 | 0.29                    | COVDGene                    |             |
| ASXL1  | 20         | 32433568  | AC                                                                                                        | A                     | D457fs                 | 0.17                    | Additional TOPMED - ECLIPSE |             |
| ASXL1  | 20         | 32433555  | G                                                                                                         | T                     | E453*                  | 0.15                    | UK Biobank                  |             |
| ASXL1  | 20         | 32433544  | AC                                                                                                        | A                     | Y449fs                 | 0.10                    | UK Biobank                  |             |
| ASXL1  | 20         | 32433529  | C                                                                                                         | A                     | S444X                  | 0.22                    | COVDGene                    |             |
| ASXL1  | 20         | 32433487  | C                                                                                                         | G                     | S430*                  | 0.16                    | UK Biobank                  |             |
| ASXL1  | 20         | 32433480  | C                                                                                                         | T                     | Q428X                  | 0.29                    | COVDGene                    |             |
| ASXL1  | 20         | 32433473  | C                                                                                                         | CA                    | Q428fs                 | 0.40                    | UK Biobank                  |             |
| ASXL1  | 20         | 32433473  | C                                                                                                         | CA                    | Q428fs                 | 0.17                    | UK Biobank                  |             |
| ASXL1  | 20         | 32433473  | C                                                                                                         | A                     | Y425*                  | 0.06                    | UK Biobank                  |             |
| ASXL1  | 20         | 32433447  | C                                                                                                         | T                     | R417*                  | 0.08                    | UK Biobank                  |             |
| ASXL1  | 20         | 32433408  | C                                                                                                         | T                     | R404*                  | 0.41                    | UK Biobank                  |             |
| ASXL1  | 20         | 32433408  | C                                                                                                         | T                     | R404*                  | 0.21                    | UK Biobank                  |             |
| ASXL1  | 20         | 32433408  | C                                                                                                         | T                     | R404*                  | 0.11                    | UK Biobank                  |             |
| ASXL1  | 20         | 32433408  | C                                                                                                         | T                     | R404*                  | 0.08                    | UK Biobank                  |             |
| ASXL1  | 20         | 32433408  | C                                                                                                         | T                     | R404*                  | 0.07                    | UK Biobank                  |             |
| ASXL1  | 20         | 32433408  | C                                                                                                         | T                     | R404*                  | 0.04                    | UK Biobank                  |             |
| ASXL1  | 20         | 32433408  | C                                                                                                         | T                     | R404X                  | 0.33                    | Additional TOPMED - ECLIPSE |             |
| ASXL1  | 20         | 32433373  | C                                                                                                         | G                     | S392*                  | 0.17                    | UK Biobank                  |             |
| ASXL1  | 20         | 32433373  | C                                                                                                         | G                     | S392X                  | 0.43                    | Additional TOPMED - ECLIPSE |             |
| ASXL1  | 20         | 32433366  | G                                                                                                         | G                     | G390X                  | 0.13                    | COVDGene                    |             |
| ASXL1  | 20         | 32433315  | C                                                                                                         | T                     | Q373X                  | 0.34                    | COVDGene                    |             |
| ASXL1  | 20         | 32433312  | C                                                                                                         | T                     | Q372*                  | 0.07                    | UK Biobank                  |             |
| ASXL1  | 20         | 32433312  | C                                                                                                         | T                     | Q372X                  | 0.11                    | COVDGene                    |             |
| ASXL1  | 20         | 32433297  | A                                                                                                         | T                     | K367*                  | 0.07                    | UK Biobank                  |             |
| ASXL1  | 20         | 32432985  | A                                                                                                         | G                     | K362R                  | 0.42                    | UK Biobank                  |             |
| ASXL1  | 20         | 32432985  | A                                                                                                         | G                     | K362R                  | 0.39                    | UK Biobank                  |             |
| ASXL1  | 20         | 31024758  | C                                                                                                         | T                     | R1415*                 | 0.07                    | ICGN-EOCOVD                 |             |
| ASXL1  | 20         | 31024662  | G                                                                                                         | T                     | E1383*                 | 0.10                    | ICGN-EOCOVD                 |             |
| ASXL1  | 20         | 31024116  | CA                                                                                                        | C                     | K1202fs                | 0.19                    | ICGN-EOCOVD                 |             |
| ASXL1  | 20         | 31023408  | C                                                                                                         | T                     | R965*                  | 0.32                    | ICGN-EOCOVD                 |             |
| ASXL1  | 20         | 31022277  | C                                                                                                         | T                     | Q588*                  | 0.23                    | ICGN-EOCOVD                 |             |
| ASXL1  | 20         | 31022233  | A                                                                                                         | C                     |                        | 0.06                    | ICGN-EOCOVD                 |             |
| ASXL1  | 20         | 31021332  | C                                                                                                         | G                     | S444*                  | 0.09                    | ICGN-EOCOVD                 |             |
| ASXL1  | 20         | 31021250  | C                                                                                                         | T                     | R417*                  | 0.23                    | ICGN-EOCOVD                 |             |
| ASXL1  | 20         | 31015977  | AGGAGCCAGAGGACACGGCTGATGTGGAGAGC<br>TGTGGGCTTAAGAGCCAGCACTGTGAGTGGT<br>GAAAACGATGGTAAGGACCCCTTTAATGGATGGG | TGAG                  | A                      |                         | 0.02                        | ICGN-EOCOVD |
| ASXL2  | 2          | 25972857  | G                                                                                                         | GT                    | T523fs                 | 0.07                    | ICGN-EOCOVD                 |             |
| ASXL2  | 2          | 25965949  | G                                                                                                         | T                     | S1086*                 | 0.09                    | ICGN-EOCOVD                 |             |
| ASXL2  | 2          | 25750016  | T                                                                                                         | A                     | K514X                  | 0.30                    | Additional TOPMED - FHS     |             |
| ASXL2  | 2          | 25742786  | TCC                                                                                                       | T                     | E1183fs                | 0.33                    | Additional TOPMED - ARIC    |             |
| BCOR   | X          | 40074111  | TTCCGGGCATG                                                                                               | C                     | H409fs                 | 0.03                    | UK Biobank                  |             |
| BCOR   | X          | 40073540  | CG                                                                                                        | T                     | P602fs                 | 0.04                    | UK Biobank                  |             |
| BCOR   | X          | 40072349  | C                                                                                                         | T                     | Q999G                  | 0.08                    | UK Biobank                  |             |
| BCOR   | X          | 40071638  | T                                                                                                         | C                     | E1017G                 | 0.13                    | UK Biobank                  |             |
| BCOR   | X          | 40063917  | A                                                                                                         | AG                    | S1180fs                | 0.97                    | COVDGene                    |             |
| BCOR   | X          | 40063726  | AG                                                                                                        | A                     | P1243fs                | 0.35                    | COVDGene                    |             |
| BCOR   | X          | 40062170  | A                                                                                                         | AG                    | L1466fs                | 0.62                    | COVDGene                    |             |
| BCOR   | X          | 40055512  | G                                                                                                         | T                     | P1533T                 | 0.09                    | UK Biobank                  |             |
| BCOR   | X          | 40053912  | A                                                                                                         | AT                    | Y1650_N1651delins<br>X | 0.11                    | Additional TOPMED - ECLIPSE |             |
| BCORL1 | X          | 130056125 | T                                                                                                         | GT                    | C1709fs                | 0.55                    | Additional TOPMED - ARIC    |             |
| BCORL1 | X          | 130051967 | GA                                                                                                        | G                     | D1602fs                | 0.23                    | COVDGene                    |             |
| BCORL1 | X          | 130051965 | C                                                                                                         | G                     | S1601X                 | 0.60                    | COVDGene                    |             |
| BCORL1 | X          | 130028794 | C                                                                                                         | A                     | S1413*                 | 0.07                    | UK Biobank                  |             |
| BCORL1 | X          | 130025210 | G                                                                                                         | A                     | W1303X                 | 0.56                    | COVDGene                    |             |
| BCORL1 | X          | 130015122 | C                                                                                                         | T                     | R784*                  | 0.04                    | UK Biobank                  |             |
| BCORL1 | X          | 130014985 | TCA                                                                                                       | T                     | N739fs                 | 0.04                    | UK Biobank                  |             |
| BCORL1 | X          | 130014695 | AC                                                                                                        | A                     | M644fs                 | 0.03                    | UK Biobank                  |             |
| BCORL1 | X          | 130014671 | TC                                                                                                        | T                     | P634fs                 | 0.04                    | UK Biobank                  |             |
| BCORL1 | X          | 130014555 | TC                                                                                                        | T                     | S595fs                 | 0.20                    | COVDGene                    |             |
| BCORL1 | X          | 130013743 | C                                                                                                         | G                     | S324X                  | 0.21                    | COVDGene                    |             |
| BRCC3  | X          | 155099364 | AT                                                                                                        | A                     | I200fs                 | 0.44                    | UK Biobank                  |             |
| BRCC3  | X          | 155089313 | CT                                                                                                        | C                     | L152fs                 | 0.11                    | Additional TOPMED - JHS     |             |
| BRCC3  | X          | 155077291 | T                                                                                                         | A                     | c.315+2T>A             | 0.12                    | COVDGene                    |             |
| BRCC3  | X          | 155077245 | GA                                                                                                        | G                     | I92fs                  | 0.05                    | UK Biobank                  |             |
| BRCC3  | X          | 155071642 | ATAGGGGAGGTGAGTAGTCTGT                                                                                    | A                     | I39fs                  | 0.24                    | Additional TOPMED - JHS     |             |
| BRCC3  | X          | 155071555 | C                                                                                                         | T                     | Q10X                   | 0.18                    | COVDGene                    |             |
| BRCC3  | X          | 155071548 | GGCGGTGGAGCCGGT                                                                                           | G                     | A8fs                   | 0.14                    | COVDGene                    |             |
| BRCC3  | X          | 155071546 | C                                                                                                         | T                     | Q7*                    | 0.07                    | UK Biobank                  |             |
| BRCC3  | X          | 155071546 | C                                                                                                         | T                     | Q7*                    | 0.07                    | UK Biobank                  |             |
| BRCC3  | X          | 155071546 | C                                                                                                         | T                     | Q7X                    | 0.63                    | COVDGene                    |             |
| BRCC3  | X          | 155071546 | C                                                                                                         | T                     | Q7X                    | 0.18                    | Additional TOPMED - ARIC    |             |
| BRCC3  | X          | 155071546 | C                                                                                                         | T                     | Q7X                    | 0.14                    | Additional TOPMED - JHS     |             |
| BRCC3  | X          | 155071537 | C                                                                                                         | T                     | Q4X                    | 0.29                    | Additional TOPMED - JHS     |             |
| BRCC3  | X          | 155071537 | C                                                                                                         | T                     | Q4X                    | 0.27                    | COVDGene                    |             |
| BRCC3  | X          | 154348353 | A                                                                                                         | AGGGGAGAGTGGAAACATGCT | N294fs                 | 0.07                    | ICGN-EOCOVD                 |             |
| BRCC3  | X          | 154317537 | G                                                                                                         | A                     |                        | 0.13                    | ICGN-EOCOVD                 |             |
| CALR   | 19         | 12943813  | A                                                                                                         | ATTGTC                | K385fs                 | 0.42                    | UK Biobank                  |             |
| CALR   | 19         | 12943813  | A                                                                                                         | ATTGTC                | K385fs                 | 0.23                    | UK Biobank                  |             |
| CALR   | 19         | 12943813  | A                                                                                                         | ATTGTC                | K385fs                 | 0.05                    | UK Biobank                  |             |
| CALR   | 19         | 12943787  | CAA                                                                                                       | C                     | K377fs                 | 0.37                    | UK Biobank                  |             |
| CBL    | 11         | 119278541 | G                                                                                                         | A                     | R420Q                  | 0.07                    | UK Biobank                  |             |
| CBL    | 11         | 119278540 | C                                                                                                         | G                     | R420G                  | 0.13                    | COVDGene                    |             |
| CBL    | 11         | 119278529 | G                                                                                                         | C                     | C416S                  | 0.12                    | UK Biobank                  |             |
| CBL    | 11         | 119278525 | G                                                                                                         | A                     | G415S                  | 0.34                    | UK Biobank                  |             |
| CBL    | 11         | 119278297 | G                                                                                                         | T                     | Q409H                  | 0.57                    | COVDGene                    |             |
| CBL    | 11         | 119278294 | G                                                                                                         | T                     | W408C                  | 0.15                    | Additional TOPMED - ARIC    |             |
| CBL    | 11         | 119278294 | G                                                                                                         | T                     | W408C                  | 0.12                    | COVDGene                    |             |
| CBL    | 11         | 119278290 | C                                                                                                         | T                     | S407F                  | 0.35                    | UK Biobank                  |             |
| CBL    | 11         | 119278272 | G                                                                                                         | A                     | C401Y                  | 0.14                    | Additional TOPMED - ECLIPSE |             |
| CBL    | 11         | 119278269 | T                                                                                                         | G                     | M400R                  | 0.14                    | UK Biobank                  |             |
| CBL    | 11         | 119278266 | T                                                                                                         | C                     | L399P                  | 0.19                    | COVDGene                    |             |
| CBL    | 11         | 119278263 | A                                                                                                         | G                     | H398R                  | 0.21                    | UK Biobank                  |             |
| CBL    | 11         | 119278248 | T                                                                                                         | C                     | I393T                  | 0.06                    | UK Biobank                  |             |

| Gene   | Chromosome | Position  | Reference            | Alternate      | Consequence | Variant Allele Fraction | Cohort                      |
|--------|------------|-----------|----------------------|----------------|-------------|-------------------------|-----------------------------|
| CBL    | 11         | 119278236 | A                    | G              | K389R       | 0.22                    | UK Biobank                  |
| CBL    | 11         | 119278235 | A                    | G              | K389E       | 0.14                    | UK Biobank                  |
| CBL    | 11         | 119278221 | G                    | A              | C384Y       | 0.53                    | Additional TOPMED - FHS     |
| CBL    | 11         | 119278221 | G                    | A              | C384Y       | 0.29                    | COPDGene                    |
| CBL    | 11         | 119148991 | G                    | A              | C404Y       | 0.07                    | ICGN-EOCOPD                 |
| CBL    | 11         | 119148929 | A                    | G              | I383M       | 0.07                    | ICGN-EOCOPD                 |
| CEBPA  | 19         | 33302168  | G                    | A              | Q83*        | 0.04                    | UK Biobank                  |
| CEBPA  | 19         | 33301789  | TG                   | T              | Q209fs      | 0.22                    | COPDGene                    |
| CREBBP | 16         | 3782810   | G                    | A              | R483*       | 0.08                    | UK Biobank                  |
| CREBBP | 16         | 3778053   | G                    | A              | Q691*       | 0.09                    | UK Biobank                  |
| CREBBP | 16         | 3749627   | G                    | A              | P1279L      | 0.32                    | UK Biobank                  |
| CSF3R  | 1          | 36466597  | GC                   | G              | G757fs      | 0.10                    | UK Biobank                  |
| CSF3R  | 1          | 36466576  | TG                   | T              | P764fs      | 0.44                    | UK Biobank                  |
| CTCF   | 16         | 67628551  | G                    | A              | R567Q       | 0.08                    | UK Biobank                  |
| CTCF   | 16         | 67621447  | A                    | T              | K405*       | 0.09                    | UK Biobank                  |
| CUX1   | 7          | 102248888 | C                    | A              | S1455*      | 0.06                    | UK Biobank                  |
| CUX1   | 7          | 102239483 | G                    | GT             | Y1263fs     | 0.43                    | UK Biobank                  |
| CUX1   | 7          | 102204469 | C                    | T              | R996*       | 0.26                    | UK Biobank                  |
| CUX1   | 7          | 102204447 | G                    | A              | W988*       | 0.10                    | UK Biobank                  |
| CUX1   | 7          | 102202102 | C                    | G              | Y935*       | 0.03                    | UK Biobank                  |
| CUX1   | 7          | 102201933 | G                    | A              | W879*       | 0.06                    | UK Biobank                  |
| CUX1   | 7          | 102196844 | T                    | TTGCA          | F478fs      | 0.20                    | COPDGene                    |
| CUX1   | 7          | 102196788 | CTT                  | C              | F460fs      | 0.15                    | COPDGene                    |
| CUX1   | 7          | 101845002 | C                    | T              | Q809*       | 0.12                    | ICGN-EOCOPD                 |
| DNMT3A | 2          | 25470584  | C                    | G              | W297S       | 0.23                    | ICGN-EOCOPD                 |
| DNMT3A | 2          | 25470583  | C                    | T              | W297*       | 0.12                    | ICGN-EOCOPD                 |
| DNMT3A | 2          | 25470583  | C                    | A              | W297C       | 0.10                    | ICGN-EOCOPD                 |
| DNMT3A | 2          | 254705116 | G                    | A              | R320*       | 0.04                    | ICGN-EOCOPD                 |
| DNMT3A | 2          | 25470498  | G                    | A              | R326C       | 0.04                    | ICGN-EOCOPD                 |
| DNMT3A | 2          | 25470460  | C                    | T              | V338V       | 0.04                    | ICGN-EOCOPD                 |
| DNMT3A | 2          | 25469959  | CT                   | C              | K361fs      | 0.14                    | ICGN-EOCOPD                 |
| DNMT3A | 2          | 25469083  | TC                   | T              | K459fs      | 0.24                    | ICGN-EOCOPD                 |
| DNMT3A | 2          | 25468122  | CT                   | C              | K518fs      | 0.07                    | ICGN-EOCOPD                 |
| DNMT3A | 2          | 25467428  | C                    | T              | G550R       | 0.07                    | ICGN-EOCOPD                 |
| DNMT3A | 2          | 25467125  | AG                   | A              | Y584fs      | 0.14                    | ICGN-EOCOPD                 |
| DNMT3A | 2          | 25467118  | C                    | T              | C586Y       | 0.26                    | ICGN-EOCOPD                 |
| DNMT3A | 2          | 25466852  | C                    | T              |             | 0.13                    | ICGN-EOCOPD                 |
| DNMT3A | 2          | 25466799  | C                    | T              | R635Q       | 0.08                    | ICGN-EOCOPD                 |
| DNMT3A | 2          | 25463568  | A                    | G              | I705T       | 0.20                    | ICGN-EOCOPD                 |
| DNMT3A | 2          | 25463289  | T                    | C              | Y735C       | 0.19                    | ICGN-EOCOPD                 |
| DNMT3A | 2          | 25463287  | G                    | A              | R736C       | 0.18                    | ICGN-EOCOPD                 |
| DNMT3A | 2          | 25463287  | G                    | A              | R736C       | 0.10                    | ICGN-EOCOPD                 |
| DNMT3A | 2          | 25463271  | G                    | A              | A741V       | 0.17                    | ICGN-EOCOPD                 |
| DNMT3A | 2          | 25463247  | C                    | T              | R749H       | 0.06                    | ICGN-EOCOPD                 |
| DNMT3A | 2          | 25463184  | G                    | A              | S770L       | 0.11                    | ICGN-EOCOPD                 |
| DNMT3A | 2          | 25463182  | G                    | A              | R771*       | 0.10                    | ICGN-EOCOPD                 |
| DNMT3A | 2          | 25462074  | A                    | C              | V778G       | 0.06                    | ICGN-EOCOPD                 |
| DNMT3A | 2          | 25462054  | C                    | T              | V785M       | 0.08                    | ICGN-EOCOPD                 |
| DNMT3A | 2          | 25462023  | C                    | T              | W795*       | 0.13                    | ICGN-EOCOPD                 |
| DNMT3A | 2          | 25462023  | C                    | T              | W795*       | 0.04                    | ICGN-EOCOPD                 |
| DNMT3A | 2          | 25462009  | CG                   | C              | G800fs      | 0.10                    | ICGN-EOCOPD                 |
| DNMT3A | 2          | 25458696  | T                    | C              |             | 0.20                    | ICGN-EOCOPD                 |
| DNMT3A | 2          | 25458627  | G                    | A              | P849L       | 0.09                    | ICGN-EOCOPD                 |
| DNMT3A | 2          | 25458593  | C                    | T              | W860*       | 0.20                    | ICGN-EOCOPD                 |
| DNMT3A | 2          | 25458580  | C                    | T              | R865K       | 0.08                    | ICGN-EOCOPD                 |
| DNMT3A | 2          | 25457243  | G                    | A              | R882C       | 0.17                    | ICGN-EOCOPD                 |
| DNMT3A | 2          | 25457243  | G                    | A              | R882C       | 0.12                    | ICGN-EOCOPD                 |
| DNMT3A | 2          | 25457192  | G                    | A              | R899C       | 0.11                    | ICGN-EOCOPD                 |
| DNMT3A | 2          | 25457192  | G                    | A              | R899C       | 0.09                    | ICGN-EOCOPD                 |
| DNMT3A | 2          | 25300139  | CG                   | C              | P59fs       | 0.12                    | Additional TOPMED - ECLIPSE |
| DNMT3A | 2          | 25300139  | CG                   | C              | P59fs       | 0.05                    | UK Biobank                  |
| DNMT3A | 2          | 25300139  | CG                   | C              | P59fs       | 0.04                    | UK Biobank                  |
| DNMT3A | 2          | 25282651  | G                    | A              | Q80*        | 0.09                    | UK Biobank                  |
| DNMT3A | 2          | 25282462  | G                    | A              | R143*       | 0.06                    | UK Biobank                  |
| DNMT3A | 2          | 25275080  | C                    | CG             | R167fs      | 0.17                    | COPDGene                    |
| DNMT3A | 2          | 25248213  | CA                   | C              | V227fs      | 0.07                    | UK Biobank                  |
| DNMT3A | 2          | 25248213  | C                    | CAGCA          | V227fs      | 0.04                    | UK Biobank                  |
| DNMT3A | 2          | 25248210  | C                    | A              | E228*       | 0.05                    | UK Biobank                  |
| DNMT3A | 2          | 25248206  | TC                   | T              | E229fs      | 0.09                    | UK Biobank                  |
| DNMT3A | 2          | 25248201  | G                    | A              | Q231*       | 0.33                    | UK Biobank                  |
| DNMT3A | 2          | 25248200  | T                    | TGGTTTCTTCCCCC | Q231fs      | 0.09                    | UK Biobank                  |
| DNMT3A | 2          | 25248192  | C                    | CG             | G234fs      | 0.13                    | UK Biobank                  |
| DNMT3A | 2          | 25248191  | C                    | CT             | G234fs      | 0.05                    | UK Biobank                  |
| DNMT3A | 2          | 25248189  | C                    | A              | E235X       | 0.67                    | COPDGene                    |
| DNMT3A | 2          | 25248183  | G                    | A              | Q237*       | 0.04                    | UK Biobank                  |
| DNMT3A | 2          | 25248183  | G                    | A              | Q237X       | 0.11                    | Additional TOPMED - ARIC    |
| DNMT3A | 2          | 25248182  | T                    | TGA            | Q237fs      | 0.03                    | UK Biobank                  |
| DNMT3A | 2          | 25248180  | T                    | TC             | K238fs      | 0.31                    | COPDGene                    |
| DNMT3A | 2          | 25248171  | CCT                  | C              | E240fs      | 0.06                    | UK Biobank                  |
| DNMT3A | 2          | 25248170  | TC                   | T              | E241fs      | 0.10                    | Additional TOPMED - ARIC    |
| DNMT3A | 2          | 25248157  | AGGAGG               | A              | P244fs      | 0.07                    | UK Biobank                  |
| DNMT3A | 2          | 25248157  | AG                   | A              | P245fs      | 0.27                    | UK Biobank                  |
| DNMT3A | 2          | 25248154  | AG                   | A              | A246fs      | 0.05                    | UK Biobank                  |
| DNMT3A | 2          | 25248150  | G                    | A              | Q248*       | 0.11                    | UK Biobank                  |
| DNMT3A | 2          | 25248148  | CTG                  | C              | Q248fs      | 0.29                    | Additional TOPMED - ECLIPSE |
| DNMT3A | 2          | 25248147  | G                    | A              | Q249*       | 0.11                    | UK Biobank                  |
| DNMT3A | 2          | 25248147  | G                    | A              | Q249*       | 0.06                    | UK Biobank                  |
| DNMT3A | 2          | 25248147  | G                    | A              | Q249X       | 0.16                    | Additional TOPMED - MESA    |
| DNMT3A | 2          | 25248147  | G                    | A              | Q249X       | 0.12                    | Additional TOPMED - MESA    |
| DNMT3A | 2          | 25248141  | TGGGCTGCTGCACAGCAGGA | T              | P244fs      | 0.22                    | COPDGene                    |
| DNMT3A | 2          | 25248128  | GA                   | G              | S255fs      | 0.09                    | UK Biobank                  |
| DNMT3A | 2          | 25248116  | GC                   | G              | A259fs      | 0.27                    | COPDGene                    |
| DNMT3A | 2          | 25248099  | CG                   | C              | V265fs      | 0.04                    | UK Biobank                  |
| DNMT3A | 2          | 25248086  | GC                   | GC             | A269fs      | 0.16                    | Additional TOPMED - JHS     |
| DNMT3A | 2          | 25248045  | C                    | A              | E283*       | 0.08                    | UK Biobank                  |
| DNMT3A | 2          | 25248045  | C                    | A              | E283*       | 0.07                    | UK Biobank                  |
| DNMT3A | 2          | 25248045  | C                    | A              | E283*       | 0.05                    | UK Biobank                  |
| DNMT3A | 2          | 25248045  | C                    | CCA            | E283fs      | 0.05                    | UK Biobank                  |
| DNMT3A | 2          | 25248039  | C                    | A              | E285X       | 0.34                    | Additional TOPMED - FHS     |

| Gene   | Chromosome | Position | Reference  | Alternate | Consequence   | Variant Allele Fraction | Cohort                      |
|--------|------------|----------|------------|-----------|---------------|-------------------------|-----------------------------|
| DNMT3A | 2          | 25248036 | C          | T         | c.855+1G>A    | 0.15                    | COPDGene                    |
| DNMT3A | 2          | 25248036 | C          | T         | c.e7-1G>A     | 0.05                    | UK Biobank                  |
| DNMT3A | 2          | 25248036 | C          | A         | c.e7-1G>T     | 0.07                    | UK Biobank                  |
| DNMT3A | 2          | 25247751 | T          | C         | c.289-2A>G    | 0.28                    | Additional TOPMED - MESA    |
| DNMT3A | 2          | 25247751 | T          | G         | c.e8+2A>C     | 0.07                    | UK Biobank                  |
| DNMT3A | 2          | 25247751 | T          | C         | c.e8+2A>G     | 0.07                    | UK Biobank                  |
| DNMT3A | 2          | 25247736 | A          | G         | F290S         | 0.10                    | COPDGene                    |
| DNMT3A | 2          | 25247730 | A          | G         | I292T         | 0.49                    | UK Biobank                  |
| DNMT3A | 2          | 25247728 | C          | T         | G293R         | 0.23                    | UK Biobank                  |
| DNMT3A | 2          | 25247728 | C          | T         | G293R         | 0.09                    | UK Biobank                  |
| DNMT3A | 2          | 25247727 | CCAATGCCAA | C         | 290_293FGIG>W | 0.04                    | UK Biobank                  |
| DNMT3A | 2          | 25247725 | C          | A         | E294X         | 0.16                    | Additional TOPMED - JHS     |
| DNMT3A | 2          | 25247725 | CCCCAA     | C         | I292fs        | 0.03                    | UK Biobank                  |
| DNMT3A | 2          | 25247724 | TC         | T         | E294fs        | 0.09                    | UK Biobank                  |
| DNMT3A | 2          | 25247721 | A          | G         | L295P         | 0.15                    | UK Biobank                  |
| DNMT3A | 2          | 25247721 | A          | T         | L295Q         | 0.23                    | Additional TOPMED - ARIC    |
| DNMT3A | 2          | 25247719 | C          | G         | V296L         | 0.14                    | UK Biobank                  |
| DNMT3A | 2          | 25247719 | C          | G         | V296L         | 0.10                    | UK Biobank                  |
| DNMT3A | 2          | 25247719 | C          | T         | V296M         | 0.36                    | Additional TOPMED - FHS     |
| DNMT3A | 2          | 25247719 | C          | T         | V296M         | 0.16                    | COPDGene                    |
| DNMT3A | 2          | 25247719 | C          | T         | V296M         | 0.06                    | UK Biobank                  |
| DNMT3A | 2          | 25247719 | C          | T         | V296M         | 0.06                    | UK Biobank                  |
| DNMT3A | 2          | 25247719 | C          | T         | V296M         | 0.05                    | UK Biobank                  |
| DNMT3A | 2          | 25247719 | C          | T         | V296M         | 0.04                    | UK Biobank                  |
| DNMT3A | 2          | 25247718 | A          | C         | V296G         | 0.24                    | COPDGene                    |
| DNMT3A | 2          | 25247715 | C          | T         | W297*         | 0.09                    | UK Biobank                  |
| DNMT3A | 2          | 25247715 | C          | T         | W297*         | 0.04                    | UK Biobank                  |
| DNMT3A | 2          | 25247715 | C          | T         | W297*         | 0.04                    | UK Biobank                  |
| DNMT3A | 2          | 25247715 | CA         | C         | W297fs        | 0.14                    | COPDGene                    |
| DNMT3A | 2          | 25247715 | C          | G         | W297S         | 0.08                    | UK Biobank                  |
| DNMT3A | 2          | 25247714 | C          | T         | W297*         | 0.29                    | UK Biobank                  |
| DNMT3A | 2          | 25247714 | C          | A         | W297C         | 0.09                    | UK Biobank                  |
| DNMT3A | 2          | 25247713 | C          | G         | G298R         | 0.17                    | Additional TOPMED - ECLIPSE |
| DNMT3A | 2          | 25247713 | C          | G         | G298R         | 0.15                    | UK Biobank                  |
| DNMT3A | 2          | 25247713 | C          | G         | G298R         | 0.03                    | UK Biobank                  |
| DNMT3A | 2          | 25247713 | C          | A         | G298W         | 0.18                    | Additional TOPMED - MESA    |
| DNMT3A | 2          | 25247712 | C          | T         | G298E         | 0.08                    | Additional TOPMED - JHS     |
| DNMT3A | 2          | 25247712 | C          | T         | G298E         | 0.07                    | UK Biobank                  |
| DNMT3A | 2          | 25247712 | C          | T         | G298E         | 0.03                    | UK Biobank                  |
| DNMT3A | 2          | 25247710 | T          | TC        | K299fs        | 0.23                    | Additional TOPMED - FHS     |
| DNMT3A | 2          | 25247706 | A          | T         | L300Q         | 0.07                    | UK Biobank                  |
| DNMT3A | 2          | 25247704 | GC         | G         | R301fs        | 0.09                    | UK Biobank                  |
| DNMT3A | 2          | 25247704 | G          | A         | R301W         | 0.07                    | UK Biobank                  |
| DNMT3A | 2          | 25247704 | G          | A         | R301W         | 0.06                    | UK Biobank                  |
| DNMT3A | 2          | 25247704 | G          | A         | R301W         | 0.03                    | UK Biobank                  |
| DNMT3A | 2          | 25247699 | GC         | G         | G302fs        | 0.11                    | UK Biobank                  |
| DNMT3A | 2          | 25247697 | A          | T         | F303Y         | 0.02                    | UK Biobank                  |
| DNMT3A | 2          | 25247693 | GGA        | G         | S304fs        | 0.20                    | UK Biobank                  |
| DNMT3A | 2          | 25247691 | C          | T         | W305*         | 0.03                    | UK Biobank                  |
| DNMT3A | 2          | 25247691 | C          | T         | W305*         | 0.03                    | UK Biobank                  |
| DNMT3A | 2          | 25247691 | CAG        | C         | W305fs        | 0.02                    | UK Biobank                  |
| DNMT3A | 2          | 25247691 | C          | T         | W305X         | 0.33                    | COPDGene                    |
| DNMT3A | 2          | 25247691 | C          | T         | W305X         | 0.12                    | Additional TOPMED - ECLIPSE |
| DNMT3A | 2          | 25247690 | C          | T         | W305*         | 0.10                    | UK Biobank                  |
| DNMT3A | 2          | 25247690 | C          | T         | W305*         | 0.09                    | UK Biobank                  |
| DNMT3A | 2          | 25247690 | C          | T         | W305*         | 0.07                    | UK Biobank                  |
| DNMT3A | 2          | 25247690 | C          | T         | W305*         | 0.05                    | UK Biobank                  |
| DNMT3A | 2          | 25247690 | C          | T         | W305*         | 0.04                    | UK Biobank                  |
| DNMT3A | 2          | 25247690 | C          | T         | W305*         | 0.03                    | UK Biobank                  |
| DNMT3A | 2          | 25247690 | C          | T         | W305*         | 0.02                    | UK Biobank                  |
| DNMT3A | 2          | 25247689 | AC         | A         | W305fs        | 0.03                    | UK Biobank                  |
| DNMT3A | 2          | 25247689 | A          | C         | W306G         | 0.03                    | UK Biobank                  |
| DNMT3A | 2          | 25247688 | C          | T         | W306*         | 0.08                    | UK Biobank                  |
| DNMT3A | 2          | 25247688 | C          | T         | W306X         | 0.36                    | COPDGene                    |
| DNMT3A | 2          | 25247687 | C          | T         | W306*         | 0.09                    | UK Biobank                  |
| DNMT3A | 2          | 25247687 | C          | C         | W306C         | 0.11                    | COPDGene                    |
| DNMT3A | 2          | 25247686 | G          | A         | P307S         | 0.05                    | UK Biobank                  |
| DNMT3A | 2          | 25247686 | G          | T         | P307T         | 0.11                    | UK Biobank                  |
| DNMT3A | 2          | 25247685 | G          | A         | P307L         | 0.05                    | UK Biobank                  |
| DNMT3A | 2          | 25247685 | G          | C         | P307R         | 0.09                    | UK Biobank                  |
| DNMT3A | 2          | 25247685 | G          | C         | P307R         | 0.06                    | UK Biobank                  |
| DNMT3A | 2          | 25247685 | G          | C         | P307R         | 0.05                    | UK Biobank                  |
| DNMT3A | 2          | 25247682 | C          | T         | G308D         | 0.35                    | UK Biobank                  |
| DNMT3A | 2          | 25247680 | G          | T         | R309S         | 0.03                    | UK Biobank                  |
| DNMT3A | 2          | 25247679 | C          | T         | R309H         | 0.03                    | UK Biobank                  |
| DNMT3A | 2          | 25247679 | C          | T         | R309H         | 0.03                    | UK Biobank                  |
| DNMT3A | 2          | 25247676 | A          | T         | I310N         | 0.03                    | UK Biobank                  |
| DNMT3A | 2          | 25247676 | A          | C         | I310S         | 0.15                    | COPDGene                    |
| DNMT3A | 2          | 25247676 | A          | C         | I310S         | 0.06                    | UK Biobank                  |
| DNMT3A | 2          | 25247676 | A          | G         | I310T         | 0.06                    | UK Biobank                  |
| DNMT3A | 2          | 25247676 | A          | G         | I310T         | 0.06                    | UK Biobank                  |
| DNMT3A | 2          | 25247676 | A          | G         | I310T         | 0.05                    | UK Biobank                  |
| DNMT3A | 2          | 25247676 | A          | G         | I310T         | 0.04                    | UK Biobank                  |
| DNMT3A | 2          | 25247667 | C          | T         | W313*         | 0.38                    | UK Biobank                  |
| DNMT3A | 2          | 25247667 | C          | T         | W313*         | 0.02                    | UK Biobank                  |
| DNMT3A | 2          | 25247667 | CA         | C         | W313fs        | 0.02                    | UK Biobank                  |
| DNMT3A | 2          | 25247666 | C          | T         | W313*         | 0.19                    | UK Biobank                  |
| DNMT3A | 2          | 25247666 | C          | T         | W313*         | 0.06                    | UK Biobank                  |
| DNMT3A | 2          | 25247666 | C          | T         | W313*         | 0.05                    | UK Biobank                  |
| DNMT3A | 2          | 25247666 | C          | T         | W313*         | 0.04                    | UK Biobank                  |
| DNMT3A | 2          | 25247666 | C          | T         | W313*         | 0.04                    | UK Biobank                  |
| DNMT3A | 2          | 25247666 | C          | T         | W313*         | 0.04                    | UK Biobank                  |
| DNMT3A | 2          | 25247666 | C          | T         | W313*         | 0.02                    | UK Biobank                  |
| DNMT3A | 2          | 25247666 | C          | T         | W313X         | 0.22                    | Additional TOPMED - ECLIPSE |
| DNMT3A | 2          | 25247666 | C          | T         | W313X         | 0.13                    | COPDGene                    |
| DNMT3A | 2          | 25247664 | C          | T         | W314*         | 0.15                    | UK Biobank                  |
| DNMT3A | 2          | 25247664 | C          | T         | W314*         | 0.08                    | UK Biobank                  |
| DNMT3A | 2          | 25247664 | C          | T         | W314*         | 0.05                    | UK Biobank                  |
| DNMT3A | 2          | 25247663 | C          | T         | W314X         | 0.31                    | Additional TOPMED - FHS     |

| Gene   | Chromosome | Position | Reference | Alternate | Consequence | Variant Allele Fraction | Cohort                      |
|--------|------------|----------|-----------|-----------|-------------|-------------------------|-----------------------------|
| DNMT3A | 2          | 25247658 | G         | A         | T316M       | 0.06                    | UK Biobank                  |
| DNMT3A | 2          | 25247658 | G         | A         | T316M       | 0.03                    | UK Biobank                  |
| DNMT3A | 2          | 25247652 | CG        | C         | R318fs      | 0.20                    | COPDGene                    |
| DNMT3A | 2          | 25247652 | CG        | T         | R318Q       | 0.02                    | UK Biobank                  |
| DNMT3A | 2          | 25247648 | G         | T         | S319R       | 0.03                    | UK Biobank                  |
| DNMT3A | 2          | 25247647 | G         | A         | R320*       | 0.34                    | UK Biobank                  |
| DNMT3A | 2          | 25247647 | G         | A         | R320*       | 0.26                    | UK Biobank                  |
| DNMT3A | 2          | 25247647 | G         | A         | R320*       | 0.15                    | UK Biobank                  |
| DNMT3A | 2          | 25247647 | G         | A         | R320*       | 0.12                    | UK Biobank                  |
| DNMT3A | 2          | 25247647 | G         | A         | R320*       | 0.07                    | UK Biobank                  |
| DNMT3A | 2          | 25247647 | G         | A         | R320*       | 0.07                    | UK Biobank                  |
| DNMT3A | 2          | 25247647 | G         | A         | R320*       | 0.06                    | UK Biobank                  |
| DNMT3A | 2          | 25247647 | G         | A         | R320*       | 0.05                    | UK Biobank                  |
| DNMT3A | 2          | 25247647 | G         | A         | R320*       | 0.05                    | UK Biobank                  |
| DNMT3A | 2          | 25247647 | G         | A         | R320*       | 0.03                    | UK Biobank                  |
| DNMT3A | 2          | 25247647 | G         | A         | R320*       | 0.03                    | UK Biobank                  |
| DNMT3A | 2          | 25247638 | CA        | C         | E323fs      | 0.11                    | UK Biobank                  |
| DNMT3A | 2          | 25247629 | G         | A         | R326C       | 0.20                    | COPDGene                    |
| DNMT3A | 2          | 25247629 | G         | A         | R326C       | 0.17                    | UK Biobank                  |
| DNMT3A | 2          | 25247629 | G         | A         | R326C       | 0.10                    | Additional TOPMED - JHS     |
| DNMT3A | 2          | 25247629 | G         | A         | R326C       | 0.10                    | UK Biobank                  |
| DNMT3A | 2          | 25247629 | G         | A         | R326C       | 0.09                    | UK Biobank                  |
| DNMT3A | 2          | 25247629 | G         | A         | R326C       | 0.06                    | UK Biobank                  |
| DNMT3A | 2          | 25247629 | G         | A         | R326C       | 0.05                    | UK Biobank                  |
| DNMT3A | 2          | 25247629 | G         | A         | R326C       | 0.05                    | UK Biobank                  |
| DNMT3A | 2          | 25247629 | G         | A         | R326C       | 0.03                    | UK Biobank                  |
| DNMT3A | 2          | 25247629 | G         | A         | R326C       | 0.03                    | UK Biobank                  |
| DNMT3A | 2          | 25247629 | G         | A         | R326C       | 0.02                    | UK Biobank                  |
| DNMT3A | 2          | 25247629 | G         | T         | R326S       | 0.13                    | Additional TOPMED - MESA    |
| DNMT3A | 2          | 25247629 | G         | T         | R326S       | 0.06                    | UK Biobank                  |
| DNMT3A | 2          | 25247629 | G         | T         | R326S       | 0.04                    | UK Biobank                  |
| DNMT3A | 2          | 25247629 | G         | T         | R326S       | 0.03                    | UK Biobank                  |
| DNMT3A | 2          | 25247629 | G         | T         | R326S       | 0.02                    | UK Biobank                  |
| DNMT3A | 2          | 25247628 | C         | T         | R326H       | 0.47                    | Additional TOPMED - MESA    |
| DNMT3A | 2          | 25247628 | C         | T         | R326H       | 0.38                    | COPDGene                    |
| DNMT3A | 2          | 25247628 | C         | T         | R326H       | 0.30                    | UK Biobank                  |
| DNMT3A | 2          | 25247628 | C         | T         | R326H       | 0.24                    | COPDGene                    |
| DNMT3A | 2          | 25247628 | C         | T         | R326H       | 0.19                    | Additional TOPMED - FHS     |
| DNMT3A | 2          | 25247628 | C         | T         | R326H       | 0.16                    | UK Biobank                  |
| DNMT3A | 2          | 25247628 | C         | T         | R326H       | 0.10                    | Additional TOPMED - ARIC    |
| DNMT3A | 2          | 25247628 | C         | T         | R326H       | 0.08                    | UK Biobank                  |
| DNMT3A | 2          | 25247628 | C         | T         | R326H       | 0.03                    | UK Biobank                  |
| DNMT3A | 2          | 25247628 | C         | T         | R326H       | 0.03                    | UK Biobank                  |
| DNMT3A | 2          | 25247628 | C         | T         | R326H       | 0.02                    | UK Biobank                  |
| DNMT3A | 2          | 25247627 | G         | G         | A322fs      | 0.09                    | COPDGene                    |
| DNMT3A | 2          | 25247625 | C         | T         | W327*       | 0.29                    | UK Biobank                  |
| DNMT3A | 2          | 25247624 | C         | T         | W327*       | 0.04                    | UK Biobank                  |
| DNMT3A | 2          | 25247623 | C         | A         | V328F       | 0.10                    | UK Biobank                  |
| DNMT3A | 2          | 25247623 | C         | A         | V328F       | 0.07                    | UK Biobank                  |
| DNMT3A | 2          | 25247622 | A         | C         | V328G       | 0.18                    | Additional TOPMED - MESA    |
| DNMT3A | 2          | 25247616 | C         | T         | W330*       | 0.05                    | UK Biobank                  |
| DNMT3A | 2          | 25247616 | C         | T         | W330*       | 0.05                    | UK Biobank                  |
| DNMT3A | 2          | 25247615 | C         | T         | W330*       | 0.14                    | UK Biobank                  |
| DNMT3A | 2          | 25247615 | C         | T         | W330*       | 0.03                    | UK Biobank                  |
| DNMT3A | 2          | 25247615 | C         | T         | W330*       | 0.02                    | UK Biobank                  |
| DNMT3A | 2          | 25247615 | C         | T         | W330X       | 0.11                    | COPDGene                    |
| DNMT3A | 2          | 25247614 | A         | T         | F331I       | 0.04                    | UK Biobank                  |
| DNMT3A | 2          | 25247614 | A         | C         | F331V       | 0.21                    | UK Biobank                  |
| DNMT3A | 2          | 25247614 | A         | C         | F331V       | 0.13                    | Additional TOPMED - ARIC    |
| DNMT3A | 2          | 25247614 | A         | C         | F331V       | 0.06                    | UK Biobank                  |
| DNMT3A | 2          | 25247611 | C         | T         | G332R       | 0.09                    | UK Biobank                  |
| DNMT3A | 2          | 25247611 | C         | T         | G332R       | 0.04                    | UK Biobank                  |
| DNMT3A | 2          | 25247611 | C         | T         | G332R       | 0.03                    | UK Biobank                  |
| DNMT3A | 2          | 25247611 | C         | T         | G332R       | 0.01                    | UK Biobank                  |
| DNMT3A | 2          | 25247610 | C         | T         | G332E       | 0.16                    | Additional TOPMED - ARIC    |
| DNMT3A | 2          | 25247596 | A         | C         | S337A       | 0.13                    | Additional TOPMED - MESA    |
| DNMT3A | 2          | 25247596 | A         | G         | S337P       | 0.24                    | UK Biobank                  |
| DNMT3A | 2          | 25247595 | G         | A         | S337L       | 0.35                    | Additional TOPMED - JHS     |
| DNMT3A | 2          | 25247595 | G         | A         | S337L       | 0.21                    | COPDGene                    |
| DNMT3A | 2          | 25247595 | G         | A         | S337L       | 0.09                    | UK Biobank                  |
| DNMT3A | 2          | 25247595 | G         | A         | S337L       | 0.07                    | UK Biobank                  |
| DNMT3A | 2          | 25247595 | G         | A         | S337L       | 0.05                    | UK Biobank                  |
| DNMT3A | 2          | 25247595 | G         | A         | S337L       | 0.02                    | UK Biobank                  |
| DNMT3A | 2          | 25247595 | G         | C         | S337X       | 0.20                    | Additional TOPMED - ECLIPSE |
| DNMT3A | 2          | 25247160 | T         | C         | c.1015-2A>G | 0.37                    | Additional TOPMED - FHS     |
| DNMT3A | 2          | 25247160 | T         | C         | c.1015-2A>G | 0.14                    | Additional TOPMED - FHS     |
| DNMT3A | 2          | 25247160 | T         | C         | c.e9+2A>G   | 0.48                    | UK Biobank                  |
| DNMT3A | 2          | 25247160 | T         | C         | c.e9+2A>G   | 0.17                    | UK Biobank                  |
| DNMT3A | 2          | 25247160 | T         | C         | c.e9+2A>G   | 0.10                    | UK Biobank                  |
| DNMT3A | 2          | 25247160 | T         | C         | c.e9+2A>G   | 0.10                    | UK Biobank                  |
| DNMT3A | 2          | 25247160 | T         | C         | c.e9+2A>G   | 0.10                    | UK Biobank                  |
| DNMT3A | 2          | 25247160 | T         | C         | c.e9+2A>G   | 0.05                    | UK Biobank                  |
| DNMT3A | 2          | 25247160 | T         | A         | c.e9+2A>T   | 0.14                    | UK Biobank                  |
| DNMT3A | 2          | 25247159 | CT        | C         | c.1015-2A>- | 0.08                    | Additional TOPMED - FHS     |
| DNMT3A | 2          | 25247159 | C         | T         | c.e9+1G>A   | 0.06                    | UK Biobank                  |
| DNMT3A | 2          | 25247159 | C         | G         | c.e9+1G>C   | 0.18                    | UK Biobank                  |
| DNMT3A | 2          | 25247150 | AAC       | A         | V341fs      | 0.35                    | COPDGene                    |
| DNMT3A | 2          | 25247144 | C         | CGG       | K343fs      | 0.17                    | COPDGene                    |
| DNMT3A | 2          | 25247142 | A         | G         | L344P       | 0.09                    | UK Biobank                  |
| DNMT3A | 2          | 25247142 | A         | T         | L344Q       | 0.09                    | UK Biobank                  |
| DNMT3A | 2          | 25247142 | A         | T         | L344Q       | 0.07                    | UK Biobank                  |
| DNMT3A | 2          | 25247142 | A         | C         | L344R       | 0.36                    | COPDGene                    |
| DNMT3A | 2          | 25247139 | AT        | A         | M345fs      | 0.05                    | UK Biobank                  |
| DNMT3A | 2          | 25247137 | G         | GC        | P346fs      | 0.26                    | UK Biobank                  |
| DNMT3A | 2          | 25247137 | G         | A         | P346S       | 0.04                    | UK Biobank                  |
| DNMT3A | 2          | 25247133 | A         | G         | L347P       | 0.16                    | UK Biobank                  |
| DNMT3A | 2          | 25247133 | A         | G         | L347P       | 0.08                    | COPDGene                    |
| DNMT3A | 2          | 25247133 | A         | T         | L347Q       | 0.14                    | UK Biobank                  |
| DNMT3A | 2          | 25247133 | AGCG      | A         | P346del     | 0.12                    | UK Biobank                  |

| Gene   | Chromosome | Position | Reference                           | Alternate | Consequence | Variant Allele Fraction | Cohort                      |
|--------|------------|----------|-------------------------------------|-----------|-------------|-------------------------|-----------------------------|
| DNMT3A | 2          | 25247121 | CA                                  | C         | C351fs      | 0.17                    | UK Biobank                  |
| DNMT3A | 2          | 25247121 | CA                                  | C         | C351fs      | 0.13                    | UK Biobank                  |
| DNMT3A | 2          | 25247121 | CAA                                 | C         | F350fs      | 0.09                    | Additional TOPMED - ARIC    |
| DNMT3A | 2          | 25247118 | CT                                  | C         | S352fs      | 0.07                    | UK Biobank                  |
| DNMT3A | 2          | 25247112 | A                                   | G         | F354S       | 0.15                    | UK Biobank                  |
| DNMT3A | 2          | 25247109 | TG                                  | T         | H355fs      | 0.05                    | UK Biobank                  |
| DNMT3A | 2          | 25247109 | TG                                  | T         | H355fs      | 0.03                    | UK Biobank                  |
| DNMT3A | 2          | 25247107 | G                                   | A         | Q356X       | 0.14                    | Additional TOPMED - ARIC    |
| DNMT3A | 2          | 25247107 | G                                   | A         | Q356X       | 0.13                    | Additional TOPMED - JHS     |
| DNMT3A | 2          | 25247106 | TGGTGGAAACGCACACTGCAAAACGAGCTCAGCGG | T         | P346fs      | 0.08                    | Additional TOPMED - ARIC    |
| DNMT3A | 2          | 25247105 | CT                                  | C         | Q356fs      | 0.16                    | UK Biobank                  |
| DNMT3A | 2          | 25247103 | GC                                  | G         | A357fs      | 0.38                    | UK Biobank                  |
| DNMT3A | 2          | 25247089 | G                                   | A         | Q362*       | 0.18                    | UK Biobank                  |
| DNMT3A | 2          | 25247089 | G                                   | A         | Q362*       | 0.07                    | UK Biobank                  |
| DNMT3A | 2          | 25247089 | G                                   | A         | Q362*       | 0.05                    | UK Biobank                  |
| DNMT3A | 2          | 25247085 | G                                   | GGC       | P363fs      | 0.06                    | UK Biobank                  |
| DNMT3A | 2          | 25247083 | TG                                  | T         | P363fs      | 0.13                    | Additional TOPMED - FHS     |
| DNMT3A | 2          | 25247079 | T                                   | C         | Y365C       | 0.04                    | UK Biobank                  |
| DNMT3A | 2          | 25247078 | G                                   | C         | Y365X       | 0.15                    | Additional TOPMED - ECLIPSE |
| DNMT3A | 2          | 25247077 | G                                   | A         | R366C       | 0.32                    | UK Biobank                  |
| DNMT3A | 2          | 25247077 | G                                   | A         | R366C       | 0.20                    | UK Biobank                  |
| DNMT3A | 2          | 25247077 | G                                   | A         | R366C       | 0.15                    | UK Biobank                  |
| DNMT3A | 2          | 25247077 | G                                   | A         | R366C       | 0.12                    | COPDGene                    |
| DNMT3A | 2          | 25247076 | C                                   | T         | R366H       | 0.08                    | UK Biobank                  |
| DNMT3A | 2          | 25247076 | C                                   | T         | R366H       | 0.04                    | UK Biobank                  |
| DNMT3A | 2          | 25247076 | C                                   | T         | R366H       | 0.03                    | UK Biobank                  |
| DNMT3A | 2          | 25247076 | C                                   | T         | R366H       | 0.03                    | UK Biobank                  |
| DNMT3A | 2          | 25247076 | C                                   | G         | R366P       | 0.08                    | UK Biobank                  |
| DNMT3A | 2          | 25247073 | TTGCGGTACATG                        | T         | P363fs      | 0.11                    | Additional TOPMED - ECLIPSE |
| DNMT3A | 2          | 25247071 | C                                   | T         | A368T       | 0.19                    | UK Biobank                  |
| DNMT3A | 2          | 25247071 | C                                   | T         | A368T       | 0.09                    | UK Biobank                  |
| DNMT3A | 2          | 25247070 | G                                   | A         | A368D       | 0.07                    | UK Biobank                  |
| DNMT3A | 2          | 25247070 | G                                   | A         | A368V       | 0.08                    | UK Biobank                  |
| DNMT3A | 2          | 25247062 | C                                   | A         | E371*       | 0.06                    | UK Biobank                  |
| DNMT3A | 2          | 25247060 | CT                                  | C         | E371fs      | 0.11                    | UK Biobank                  |
| DNMT3A | 2          | 25247059 | C                                   | T         | V372I       | 0.08                    | UK Biobank                  |
| DNMT3A | 2          | 25247058 | A                                   | T         | V372D       | 0.06                    | UK Biobank                  |
| DNMT3A | 2          | 25247050 | C                                   | T         | c.e9-1G>A   | 0.29                    | UK Biobank                  |
| DNMT3A | 2          | 25247050 | C                                   | T         | c.e9-1G>A   | 0.13                    | UK Biobank                  |
| DNMT3A | 2          | 25247049 | AC                                  | A         | c.e9-2GT>T  | 0.28                    | UK Biobank                  |
| DNMT3A | 2          | 25246778 | T                                   | C         | c.556-2A>G  | 0.14                    | Additional TOPMED - ECLIPSE |
| DNMT3A | 2          | 25246778 | T                                   | C         | c.e10+2A>G  | 0.04                    | UK Biobank                  |
| DNMT3A | 2          | 25246778 | T                                   | C         | c.e10+2A>G  | 0.04                    | UK Biobank                  |
| DNMT3A | 2          | 25246777 | C                                   | G         | c.1123-1G>C | 0.16                    | COPDGene                    |
| DNMT3A | 2          | 25246770 | TG                                  | T         | A376fs      | 0.08                    | COPDGene                    |
| DNMT3A | 2          | 25246768 | GCTGGCCAC                           | G         | V375fs      | 0.07                    | UK Biobank                  |
| DNMT3A | 2          | 25246764 | G                                   | A         | R379C       | 0.24                    | Additional TOPMED - ECLIPSE |
| DNMT3A | 2          | 25246764 | G                                   | A         | R379C       | 0.16                    | UK Biobank                  |
| DNMT3A | 2          | 25246764 | G                                   | A         | R379C       | 0.12                    | COPDGene                    |
| DNMT3A | 2          | 25246764 | G                                   | C         | R379G       | 0.04                    | UK Biobank                  |
| DNMT3A | 2          | 25246755 | TC                                  | T         | G381fs      | 0.12                    | COPDGene                    |
| DNMT3A | 2          | 25246745 | G                                   | A         | P385L       | 0.47                    | UK Biobank                  |
| DNMT3A | 2          | 25246744 | CG                                  | C         | P385fs      | 0.21                    | UK Biobank                  |
| DNMT3A | 2          | 25246744 | CG                                  | C         | P385fs      | 0.15                    | UK Biobank                  |
| DNMT3A | 2          | 25246744 | CG                                  | C         | P385fs      | 0.15                    | UK Biobank                  |
| DNMT3A | 2          | 25246744 | CG                                  | C         | P385fs      | 0.08                    | UK Biobank                  |
| DNMT3A | 2          | 25246744 | CG                                  | C         | P385fs      | 0.03                    | UK Biobank                  |
| DNMT3A | 2          | 25246738 | G                                   | T         | C387*       | 0.04                    | UK Biobank                  |
| DNMT3A | 2          | 25246732 | GTC                                 | G         | D389fs      | 0.03                    | UK Biobank                  |
| DNMT3A | 2          | 25246725 | C                                   | A         | E392*       | 0.04                    | UK Biobank                  |
| DNMT3A | 2          | 25246723 | C                                   | CT        | E392fs      | 0.09                    | Additional TOPMED - FHS     |
| DNMT3A | 2          | 25246710 | T                                   | A         | K397X       | 0.14                    | Additional TOPMED - FHS     |
| DNMT3A | 2          | 25246695 | G                                   | A         | Q402*       | 0.06                    | UK Biobank                  |
| DNMT3A | 2          | 25246695 | G                                   | A         | Q402*       | 0.03                    | UK Biobank                  |
| DNMT3A | 2          | 25246679 | A                                   | C         | H407S       | 0.15                    | COPDGene                    |
| DNMT3A | 2          | 25246674 | A                                   | T         | W409R       | 0.16                    | Additional TOPMED - MESA    |
| DNMT3A | 2          | 25246673 | C                                   | T         | W409*       | 0.03                    | UK Biobank                  |
| DNMT3A | 2          | 25246666 | CA                                  | C         | L411fs      | 0.05                    | UK Biobank                  |
| DNMT3A | 2          | 25246665 | C                                   | CA        | G412fs      | 0.18                    | COPDGene                    |
| DNMT3A | 2          | 25246665 | C                                   | CA        | G412fs      | 0.05                    | UK Biobank                  |
| DNMT3A | 2          | 25246661 | C                                   | A         | G413V       | 0.07                    | Additional TOPMED - MESA    |
| DNMT3A | 2          | 25246660 | G                                   | GC        | F414fs      | 0.06                    | UK Biobank                  |
| DNMT3A | 2          | 25246659 | A                                   | C         | F414V       | 0.11                    | Additional TOPMED - MESA    |
| DNMT3A | 2          | 25246659 | AG                                  | A         | G413fs      | 0.09                    | COPDGene                    |
| DNMT3A | 2          | 25246658 | A                                   | G         | F414S       | 0.30                    | COPDGene                    |
| DNMT3A | 2          | 25246657 | GA                                  | G         | F414fs      | 0.49                    | UK Biobank                  |
| DNMT3A | 2          | 25246648 | AG                                  | A         | S417fs      | 0.05                    | UK Biobank                  |
| DNMT3A | 2          | 25246645 | GC                                  | G         | G418fs      | 0.19                    | Additional TOPMED - ECLIPSE |
| DNMT3A | 2          | 25246645 | GC                                  | G         | G418fs      | 0.06                    | COPDGene                    |
| DNMT3A | 2          | 25246619 | C                                   | G         | c.1279+1G>C | 0.14                    | COPDGene                    |
| DNMT3A | 2          | 25246619 | C                                   | T         | c.e10-1G>A  | 0.11                    | UK Biobank                  |
| DNMT3A | 2          | 25246619 | C                                   | T         | c.e10-1G>A  | 0.06                    | UK Biobank                  |
| DNMT3A | 2          | 25246295 | AG                                  | A         | Y432fs      | 0.17                    | UK Biobank                  |
| DNMT3A | 2          | 25246276 | T                                   | TC        | D438fs      | 0.18                    | COPDGene                    |
| DNMT3A | 2          | 25246272 | CA                                  | C         | M439fs      | 0.16                    | Additional TOPMED - MESA    |
| DNMT3A | 2          | 25246270 | C                                   | T         | W440*       | 0.11                    | UK Biobank                  |
| DNMT3A | 2          | 25246270 | C                                   | T         | W440*       | 0.06                    | UK Biobank                  |
| DNMT3A | 2          | 25246269 | C                                   | T         | W440*       | 0.06                    | UK Biobank                  |
| DNMT3A | 2          | 25246269 | C                                   | CCA       | W440fs      | 0.16                    | UK Biobank                  |
| DNMT3A | 2          | 25246245 | G                                   | C         | Y448X       | 0.15                    | COPDGene                    |
| DNMT3A | 2          | 25246230 | TG                                  | T         | P453fs      | 0.22                    | Additional TOPMED - ECLIPSE |
| DNMT3A | 2          | 25246221 | C                                   | CT        | P457fs      | 0.14                    | UK Biobank                  |
| DNMT3A | 2          | 25246220 | GC                                  | G         | K456fs      | 0.07                    | UK Biobank                  |
| DNMT3A | 2          | 25246216 | CG                                  | C         | R458fs      | 0.19                    | Additional TOPMED - JHS     |
| DNMT3A | 2          | 25246216 | CG                                  | C         | R458fs      | 0.15                    | COPDGene                    |
| DNMT3A | 2          | 25246216 | CG                                  | C         | R458fs      | 0.06                    | UK Biobank                  |
| DNMT3A | 2          | 25246214 | TC                                  | T         | K459fs      | 0.06                    | UK Biobank                  |
| DNMT3A | 2          | 25246214 | TC                                  | T         | R458fs      | 0.19                    | Additional TOPMED - ARIC    |
| DNMT3A | 2          | 25246214 | TC                                  | T         | R458fs      | 0.14                    | COPDGene                    |

| Gene   | Chromosome | Position | Reference             | Alternate | Consequence                   | Variant Allele Fraction | Cohort                      |
|--------|------------|----------|-----------------------|-----------|-------------------------------|-------------------------|-----------------------------|
| DNMT3A | 2          | 25246202 | C                     | A         | E463*                         | 0.23                    | UK Biobank                  |
| DNMT3A | 2          | 25246202 | C                     | A         | E463*                         | 0.04                    | UK Biobank                  |
| DNMT3A | 2          | 25246198 | TTC                   | T         | E463fs                        | 0.53                    | COPDGene                    |
| DNMT3A | 2          | 25246186 | T                     | C         | K468R                         | 0.19                    | Additional TOPMED - JHS     |
| DNMT3A | 2          | 25246185 | C                     | CT        | E469fs                        | 0.06                    | UK Biobank                  |
| DNMT3A | 2          | 25246184 | C                     | A         | E469*                         | 0.18                    | UK Biobank                  |
| DNMT3A | 2          | 25246163 | T                     | A         | R476*                         | 0.06                    | UK Biobank                  |
| DNMT3A | 2          | 25246162 | C                     | CT        | R476fs                        | 0.07                    | UK Biobank                  |
| DNMT3A | 2          | 25246159 | C                     | T         | c.1429+1G>A                   | 0.09                    | COPDGene                    |
| DNMT3A | 2          | 25246159 | C                     | A         | c.1429+1G>T                   | 0.19                    | COPDGene                    |
| DNMT3A | 2          | 25246159 | C                     | T         | c.e11-1G>A                    | 0.16                    | UK Biobank                  |
| DNMT3A | 2          | 25246159 | C                     | T         | c.e11-1G>A                    | 0.14                    | UK Biobank                  |
| DNMT3A | 2          | 25246159 | C                     | T         | c.e11-1G>A                    | 0.14                    | UK Biobank                  |
| DNMT3A | 2          | 25246159 | C                     | T         | c.e11-1G>A                    | 0.11                    | UK Biobank                  |
| DNMT3A | 2          | 25246159 | C                     | T         | c.e11-1G>A                    | 0.05                    | UK Biobank                  |
| DNMT3A | 2          | 25246159 | C                     | T         | c.e11-1G>A                    | 0.05                    | UK Biobank                  |
| DNMT3A | 2          | 25246159 | C                     | A         | c.e11-1G>T                    | 0.16                    | UK Biobank                  |
| DNMT3A | 2          | 25246159 | C                     | T         | c.e11-1G>T                    | 0.08                    | UK Biobank                  |
| DNMT3A | 2          | 25246159 | C                     | A         | c.e11-1G>T                    | 0.07                    | UK Biobank                  |
| DNMT3A | 2          | 25246066 | T                     | C         | c.1430-2A>G                   | 0.23                    | COPDGene                    |
| DNMT3A | 2          | 25246066 | T                     | G         | c.e12+2A>C                    | 0.08                    | UK Biobank                  |
| DNMT3A | 2          | 25246066 | T                     | A         | c.e12+2A>T                    | 0.13                    | UK Biobank                  |
| DNMT3A | 2          | 25246065 | C                     | A         | c.1430-1G>T                   | 0.43                    | Additional TOPMED - ARIC    |
| DNMT3A | 2          | 25246065 | C                     | T         | c.e12+1G>A                    | 0.06                    | UK Biobank                  |
| DNMT3A | 2          | 25246059 | GC                    | G         | L479fs                        | 0.05                    | UK Biobank                  |
| DNMT3A | 2          | 25246045 | CACCTCGT              | C         | Y481fs                        | 0.13                    | UK Biobank                  |
| DNMT3A | 2          | 25246042 | CCGCACCT              | C         | E482fs                        | 0.12                    | Additional TOPMED - FHS     |
| DNMT3A | 2          | 25246041 | G                     | A         | Q485*                         | 0.03                    | UK Biobank                  |
| DNMT3A | 2          | 25246041 | G                     | A         | Q485X                         | 0.13                    | Additional TOPMED - ECLIPSE |
| DNMT3A | 2          | 25246041 | G                     | A         | Q485X                         | 0.13                    | COPDGene                    |
| DNMT3A | 2          | 25246037 | TTCTGCCGC             | T         | V483fs                        | 0.18                    | COPDGene                    |
| DNMT3A | 2          | 25246036 | CT                    | C         | K486fs                        | 0.13                    | Additional TOPMED - ARIC    |
| DNMT3A | 2          | 25246036 | CT                    | C         | K486fs                        | 0.06                    | UK Biobank                  |
| DNMT3A | 2          | 25246031 | CG                    | C         | R488fs                        | 0.17                    | COPDGene                    |
| DNMT3A | 2          | 25246029 | TC                    | T         | N489fs                        | 0.10                    | UK Biobank                  |
| DNMT3A | 2          | 25246023 | C                     | CA        | E491_D492delinsX              | 0.16                    | COPDGene                    |
| DNMT3A | 2          | 25246023 | C                     | CA        | E491_D492delinsX              | 0.11                    | COPDGene                    |
| DNMT3A | 2          | 25246023 | CA                    | C         | I490fs                        | 0.10                    | Additional TOPMED - ARIC    |
| DNMT3A | 2          | 25246019 | C                     | T         | c.907+1G>A                    | 0.21                    | Additional TOPMED - FHS     |
| DNMT3A | 2          | 25246019 | C                     | T         | c.e12-1G>A                    | 0.31                    | UK Biobank                  |
| DNMT3A | 2          | 25246019 | C                     | T         | c.e12-1G>A                    | 0.12                    | UK Biobank                  |
| DNMT3A | 2          | 25246019 | C                     | T         | c.e12-1G>A                    | 0.06                    | UK Biobank                  |
| DNMT3A | 2          | 25246019 | C                     | G         | c.e12-1G>C                    | 0.34                    | UK Biobank                  |
| DNMT3A | 2          | 25245333 | C                     | A         | c.908-1G>T                    | 0.12                    | Additional TOPMED - ARIC    |
| DNMT3A | 2          | 25245333 | C                     | G         | c.e13+1G>C                    | 0.08                    | UK Biobank                  |
| DNMT3A | 2          | 25245326 | C                     | T         | C494Y                         | 0.17                    | COPDGene                    |
| DNMT3A | 2          | 25245324 | TG                    | T         | C494X                         | 0.14                    | COPDGene                    |
| DNMT3A | 2          | 25245324 | TGCAGATGCTGGAAA       | T         | D492fs                        | 0.17                    | COPDGene                    |
| DNMT3A | 2          | 25245317 | C                     | C         | C497Y                         | 0.10                    | COPDGene                    |
| DNMT3A | 2          | 25245317 | C                     | T         | C497Y                         | 0.08                    | COPDGene                    |
| DNMT3A | 2          | 25245300 | T                     | TA        | T503fs                        | 0.15                    | UK Biobank                  |
| DNMT3A | 2          | 25245299 | GT                    | G         | T503fs                        | 0.12                    | UK Biobank                  |
| DNMT3A | 2          | 25245298 | GGT                   | G         | T503fs                        | 0.11                    | UK Biobank                  |
| DNMT3A | 2          | 25245294 | C                     | A         | E505*                         | 0.09                    | UK Biobank                  |
| DNMT3A | 2          | 25245292 | TTCCAGGG              | T         | T503fs                        | 0.17                    | COPDGene                    |
| DNMT3A | 2          | 25245288 | G                     | GGT       | P507fs                        | 0.28                    | COPDGene                    |
| DNMT3A | 2          | 25245276 | CA                    | C         | V510fs                        | 0.12                    | COPDGene                    |
| DNMT3A | 2          | 25245275 | C                     | T         | G511E                         | 0.23                    | COPDGene                    |
| DNMT3A | 2          | 25245266 | CA                    | C         | C514fs                        | 0.20                    | Additional TOPMED - MESA    |
| DNMT3A | 2          | 25245264 | G                     | A         | Q515X                         | 0.12                    | Additional TOPMED - ARIC    |
| DNMT3A | 2          | 25245252 | C                     | T         | c.e13-1G>A                    | 0.10                    | UK Biobank                  |
| DNMT3A | 2          | 25245252 | C                     | T         | c.e13-1G>A                    | 0.09                    | UK Biobank                  |
| DNMT3A | 2          | 25244654 | T                     | C         | c.e14+2A>G                    | 0.18                    | UK Biobank                  |
| DNMT3A | 2          | 25244654 | T                     | C         | c.e14+2A>G                    | 0.09                    | UK Biobank                  |
| DNMT3A | 2          | 25244653 | C                     | G         | c.1555-1G>C                   | 0.11                    | COPDGene                    |
| DNMT3A | 2          | 25244651 | TTCTAGACAGCAGCGGAAGGG | T         | c.e14-1CCCTTCCCGCTGCTGTAGAA>A | 0.04                    | UK Biobank                  |
| DNMT3A | 2          | 25244648 | C                     | CA        | C520fs                        | 0.16                    | UK Biobank                  |
| DNMT3A | 2          | 25244648 | CAG                   | C         | N519fs                        | 0.12                    | COPDGene                    |
| DNMT3A | 2          | 25244640 | C                     | A         | E523X                         | 0.20                    | COPDGene                    |
| DNMT3A | 2          | 25244639 | TC                    | T         | E523fs                        | 0.05                    | UK Biobank                  |
| DNMT3A | 2          | 25244633 | GCA                   | G         | A525fs                        | 0.06                    | UK Biobank                  |
| DNMT3A | 2          | 25244633 | GCA                   | G         | C524fs                        | 0.21                    | Additional TOPMED - JHS     |
| DNMT3A | 2          | 25244633 | GCA                   | G         | C524fs                        | 0.14                    | COPDGene                    |
| DNMT3A | 2          | 25244628 | G                     | A         | Q527X                         | 0.37                    | COPDGene                    |
| DNMT3A | 2          | 25244627 | T                     | G         | Q527P                         | 0.14                    | UK Biobank                  |
| DNMT3A | 2          | 25244623 | G                     | T         | Y528*                         | 0.13                    | UK Biobank                  |
| DNMT3A | 2          | 25244622 | C                     | T         | D529N                         | 0.16                    | Additional TOPMED - FHS     |
| DNMT3A | 2          | 25244622 | C                     | T         | D529N                         | 0.15                    | Additional TOPMED - MESA    |
| DNMT3A | 2          | 25244622 | C                     | T         | D529N                         | 0.10                    | UK Biobank                  |
| DNMT3A | 2          | 25244621 | T                     | A         | D529V                         | 0.10                    | COPDGene                    |
| DNMT3A | 2          | 25244616 | C                     | T         | D531N                         | 0.20                    | UK Biobank                  |
| DNMT3A | 2          | 25244613 | C                     | T         | G532S                         | 0.23                    | UK Biobank                  |
| DNMT3A | 2          | 25244609 | T                     | C         | Y533C                         | 0.31                    | COPDGene                    |
| DNMT3A | 2          | 25244607 | G                     | A         | Q534X                         | 0.21                    | Additional TOPMED - JHS     |
| DNMT3A | 2          | 25244606 | TG                    | T         | Q534fs                        | 0.09                    | UK Biobank                  |
| DNMT3A | 2          | 25244601 | AG                    | A         | S535fs                        | 0.43                    | COPDGene                    |
| DNMT3A | 2          | 25244601 | AG                    | A         | S535fs                        | 0.13                    | Additional TOPMED - ECLIPSE |
| DNMT3A | 2          | 25244599 | GT                    | G         | Y536fs                        | 0.27                    | COPDGene                    |
| DNMT3A | 2          | 25244599 | G                     | C         | Y536X                         | 0.38                    | Additional TOPMED - FHS     |
| DNMT3A | 2          | 25244597 | C                     | T         | C537Y                         | 0.08                    | UK Biobank                  |
| DNMT3A | 2          | 25244596 | G                     | T         | C537X                         | 0.15                    | Additional TOPMED - JHS     |
| DNMT3A | 2          | 25244594 | GTGCAGTA              | G         | Y536fs                        | 0.22                    | COPDGene                    |
| DNMT3A | 2          | 25244589 | AGATG                 | A         | I539fs                        | 0.18                    | UK Biobank                  |
| DNMT3A | 2          | 25244582 | C                     | A         | G542V                         | 0.15                    | Additional TOPMED - ARIC    |
| DNMT3A | 2          | 25244580 | C                     | A         | G543C                         | 0.31                    | COPDGene                    |
| DNMT3A | 2          | 25244580 | C                     | A         | G543C                         | 0.21                    | Additional TOPMED - JHS     |
| DNMT3A | 2          | 25244580 | C                     | A         | G543C                         | 0.19                    | UK Biobank                  |
| DNMT3A | 2          | 25244580 | C                     | A         | G543C                         | 0.16                    | UK Biobank                  |
| DNMT3A | 2          | 25244580 | C                     | A         | G543C                         | 0.15                    | Additional TOPMED - FHS     |

| Gene   | Chromosome | Position | Reference         | Alternate | Consequence   | Variant Allele Fraction | Cohort                      |
|--------|------------|----------|-------------------|-----------|---------------|-------------------------|-----------------------------|
| DNMT3A | 2          | 25244580 | C                 | A         | G543C         | 0.09                    | UK Biobank                  |
| DNMT3A | 2          | 25244580 | C                 | A         | G543C         | 0.08                    | UK Biobank                  |
| DNMT3A | 2          | 25244580 | C                 | A         | G543C         | 0.04                    | UK Biobank                  |
| DNMT3A | 2          | 25244579 | C                 | G         | G543A         | 0.27                    | UK Biobank                  |
| DNMT3A | 2          | 25244579 | C                 | G         | G543A         | 0.23                    | Additional TOPMED - ECLIPSE |
| DNMT3A | 2          | 25244579 | C                 | G         | G543A         | 0.09                    | Additional TOPMED - ARIC    |
| DNMT3A | 2          | 25244579 | C                 | T         | G543D         | 0.13                    | UK Biobank                  |
| DNMT3A | 2          | 25244579 | C                 | A         | G543V         | 0.10                    | COPDGene                    |
| DNMT3A | 2          | 25244579 | C                 | A         | G543V         | 0.05                    | UK Biobank                  |
| DNMT3A | 2          | 25244579 | C                 | A         | G543V         | 0.02                    | UK Biobank                  |
| DNMT3A | 2          | 25244577 | GGCCCC            | G         | G542fs        | 0.06                    | UK Biobank                  |
| DNMT3A | 2          | 25244568 | G                 | A         | L547F         | 0.44                    | Additional TOPMED - MESA    |
| DNMT3A | 2          | 25244567 | AG                | A         | L547fs        | 0.23                    | COPDGene                    |
| DNMT3A | 2          | 25244567 | A                 | C         | L547R         | 0.13                    | Additional TOPMED - ARIC    |
| DNMT3A | 2          | 25244567 | A                 | C         | L547R         | 0.07                    | UK Biobank                  |
| DNMT3A | 2          | 25244564 | A                 | C         | M548R         | 0.08                    | UK Biobank                  |
| DNMT3A | 2          | 25244563 | CAT               | C         | M548fs        | 0.17                    | Additional TOPMED - FHS     |
| DNMT3A | 2          | 25244563 | C                 | T         | M548I         | 0.23                    | COPDGene                    |
| DNMT3A | 2          | 25244559 | C                 | T         | G550R         | 0.47                    | COPDGene                    |
| DNMT3A | 2          | 25244559 | C                 | T         | G550R         | 0.26                    | UK Biobank                  |
| DNMT3A | 2          | 25244559 | C                 | T         | G550R         | 0.20                    | COPDGene                    |
| DNMT3A | 2          | 25244559 | C                 | T         | G550R         | 0.13                    | COPDGene                    |
| DNMT3A | 2          | 25244559 | C                 | T         | G550R         | 0.12                    | Additional TOPMED - JHS     |
| DNMT3A | 2          | 25244559 | C                 | T         | G550R         | 0.06                    | Additional TOPMED - JHS     |
| DNMT3A | 2          | 25244559 | C                 | A         | G550X         | 0.17                    | COPDGene                    |
| DNMT3A | 2          | 25244557 | TC                | T         | G550fs        | 0.07                    | UK Biobank                  |
| DNMT3A | 2          | 25244550 | TG                | T         | N552fs        | 0.21                    | Additional TOPMED - ECLIPSE |
| DNMT3A | 2          | 25244550 | TG                | T         | N552fs        | 0.12                    | UK Biobank                  |
| DNMT3A | 2          | 25244550 | TG                | T         | N552fs        | 0.10                    | UK Biobank                  |
| DNMT3A | 2          | 25244547 | A                 | C         | C554G         | 0.08                    | UK Biobank                  |
| DNMT3A | 2          | 25244546 | C                 | T         | C554Y         | 0.09                    | Additional TOPMED - ECLIPSE |
| DNMT3A | 2          | 25244541 | T                 | C         | R556G         | 0.27                    | UK Biobank                  |
| DNMT3A | 2          | 25244541 | T                 | C         | R556G         | 0.10                    | Additional TOPMED - ARIC    |
| DNMT3A | 2          | 25244541 | T                 | C         | R556G         | 0.10                    | Additional TOPMED - MESA    |
| DNMT3A | 2          | 25244539 | C                 | T         | c.1667+1G>A   | 0.25                    | COPDGene                    |
| DNMT3A | 2          | 25244539 | C                 | T         | c.1667+1G>A   | 0.13                    | COPDGene                    |
| DNMT3A | 2          | 25244539 | C                 | G         | c.1667+1G>C   | 0.17                    | Additional TOPMED - FHS     |
| DNMT3A | 2          | 25244539 | C                 | T         | c.e14-1G>A    | 0.19                    | UK Biobank                  |
| DNMT3A | 2          | 25244539 | C                 | T         | c.e14-1G>A    | 0.15                    | UK Biobank                  |
| DNMT3A | 2          | 25244539 | C                 | T         | c.e14-1G>A    | 0.13                    | UK Biobank                  |
| DNMT3A | 2          | 25244539 | C                 | T         | c.e14-1G>A    | 0.10                    | UK Biobank                  |
| DNMT3A | 2          | 25244539 | C                 | T         | c.e14-1G>A    | 0.08                    | UK Biobank                  |
| DNMT3A | 2          | 25244539 | C                 | A         | c.e14-1G>T    | 0.20                    | UK Biobank                  |
| DNMT3A | 2          | 25244538 | A                 | T         | c.e14-2T>A    | 0.31                    | UK Biobank                  |
| DNMT3A | 2          | 25244339 | C                 | G         | c.1101-1G>C   | 0.40                    | Additional TOPMED - ECLIPSE |
| DNMT3A | 2          | 25244339 | C                 | T         | c.e15+1G>A    | 0.27                    | UK Biobank                  |
| DNMT3A | 2          | 25244339 | C                 | T         | c.e15+1G>A    | 0.20                    | UK Biobank                  |
| DNMT3A | 2          | 25244338 | C                 | A         | R556S         | 0.12                    | UK Biobank                  |
| DNMT3A | 2          | 25244338 | C                 | A         | R556S         | 0.09                    | Additional TOPMED - FHS     |
| DNMT3A | 2          | 25244336 | C                 | T         | C557Y         | 0.14                    | UK Biobank                  |
| DNMT3A | 2          | 25244336 | C                 | T         | C557Y         | 0.08                    | UK Biobank                  |
| DNMT3A | 2          | 25244331 | A                 | G         | C559R         | 0.21                    | UK Biobank                  |
| DNMT3A | 2          | 25244330 | CA                | C         | C559fs        | 0.12                    | UK Biobank                  |
| DNMT3A | 2          | 25244329 | GCAAAGCAC         | G         | 556 559RCFC>S | 0.05                    | UK Biobank                  |
| DNMT3A | 2          | 25244325 | C                 | A         | E561*         | 0.10                    | UK Biobank                  |
| DNMT3A | 2          | 25244322 | AC                | A         | E561fs        | 0.03                    | UK Biobank                  |
| DNMT3A | 2          | 25244321 | C                 | A         | C562F         | 0.09                    | UK Biobank                  |
| DNMT3A | 2          | 25244321 | C                 | A         | C562F         | 0.08                    | UK Biobank                  |
| DNMT3A | 2          | 25244321 | C                 | G         | C562S         | 0.07                    | UK Biobank                  |
| DNMT3A | 2          | 25244321 | C                 | T         | C562Y         | 0.23                    | Additional TOPMED - JHS     |
| DNMT3A | 2          | 25244321 | C                 | T         | C562Y         | 0.18                    | UK Biobank                  |
| DNMT3A | 2          | 25244319 | C                 | T         | V563M         | 0.27                    | UK Biobank                  |
| DNMT3A | 2          | 25244319 | C                 | T         | V563M         | 0.17                    | COPDGene                    |
| DNMT3A | 2          | 25244315 | TC                | T         | D564fs        | 0.04                    | UK Biobank                  |
| DNMT3A | 2          | 25244303 | CCCA              | C         | V567del       | 0.03                    | UK Biobank                  |
| DNMT3A | 2          | 25244301 | GC                | G         | G568fs        | 0.21                    | Additional TOPMED - FHS     |
| DNMT3A | 2          | 25244294 | GC                | G         | A571fs        | 0.17                    | UK Biobank                  |
| DNMT3A | 2          | 25244294 | GCC               | G         | A571fs        | 0.11                    | UK Biobank                  |
| DNMT3A | 2          | 25244290 | GGCA              | G         | A572del       | 0.08                    | UK Biobank                  |
| DNMT3A | 2          | 25244289 | G                 | A         | Q573*         | 0.07                    | UK Biobank                  |
| DNMT3A | 2          | 25244289 | G                 | A         | Q573*         | 0.05                    | UK Biobank                  |
| DNMT3A | 2          | 25244289 | G                 | A         | Q573*         | 0.05                    | UK Biobank                  |
| DNMT3A | 2          | 25244289 | G                 | A         | Q573*         | 0.03                    | UK Biobank                  |
| DNMT3A | 2          | 25244287 | CTGGGCAG          | C         | A571fs        | 0.16                    | UK Biobank                  |
| DNMT3A | 2          | 25244285 | GC                | G         | A574fs        | 0.11                    | UK Biobank                  |
| DNMT3A | 2          | 25244284 | TG                | T         | A574fs        | 0.06                    | UK Biobank                  |
| DNMT3A | 2          | 25244284 | TGCCTGGGCA        | T         | AQA572del     | 0.15                    | UK Biobank                  |
| DNMT3A | 2          | 25244284 | TGCCTGGGCA        | T         | AQA572del     | 0.08                    | UK Biobank                  |
| DNMT3A | 2          | 25244283 | C                 | G         | A575P         | 0.23                    | UK Biobank                  |
| DNMT3A | 2          | 25244283 | C                 | G         | A575P         | 0.21                    | UK Biobank                  |
| DNMT3A | 2          | 25244283 | C                 | G         | A575P         | 0.07                    | UK Biobank                  |
| DNMT3A | 2          | 25244279 | ATGGCTGCCTGGGCAGC | A         | A571fs        | 0.04                    | UK Biobank                  |
| DNMT3A | 2          | 25244270 | TCTCCCTAATGGCTGC  | T         | A574fs        | 0.15                    | UK Biobank                  |
| DNMT3A | 2          | 25244265 | AG                | A         | W581fs        | 0.34                    | UK Biobank                  |
| DNMT3A | 2          | 25244265 | AG                | A         | W581fs        | 0.10                    | UK Biobank                  |
| DNMT3A | 2          | 25244265 | AG                | A         | W581fs        | 0.09                    | UK Biobank                  |
| DNMT3A | 2          | 25244265 | A                 | G         | W581R         | 0.20                    | Additional TOPMED - MESA    |
| DNMT3A | 2          | 25244264 | C                 | T         | W581*         | 0.06                    | UK Biobank                  |
| DNMT3A | 2          | 25244263 | C                 | T         | W581*         | 0.09                    | UK Biobank                  |
| DNMT3A | 2          | 25244263 | C                 | T         | W581*         | 0.03                    | UK Biobank                  |
| DNMT3A | 2          | 25244263 | C                 | G         | W581C         | 0.30                    | Additional TOPMED - FHS     |
| DNMT3A | 2          | 25244263 | C                 | A         | W581C         | 0.22                    | COPDGene                    |
| DNMT3A | 2          | 25244263 | C                 | G         | W581C         | 0.18                    | UK Biobank                  |
| DNMT3A | 2          | 25244263 | C                 | A         | W581C         | 0.16                    | UK Biobank                  |
| DNMT3A | 2          | 25244263 | C                 | G         | W581C         | 0.14                    | COPDGene                    |
| DNMT3A | 2          | 25244263 | C                 | G         | W581C         | 0.13                    | UK Biobank                  |
| DNMT3A | 2          | 25244263 | C                 | A         | W581C         | 0.03                    | UK Biobank                  |
| DNMT3A | 2          | 25244259 | A                 | T         | C583S         | 0.07                    | UK Biobank                  |
| DNMT3A | 2          | 25244257 | G                 | T         | C583*         | 0.26                    | UK Biobank                  |

| Gene   | Chromosome | Position | Reference | Alternate | Consequence | Variant Allele Fraction | Cohort                      |
|--------|------------|----------|-----------|-----------|-------------|-------------------------|-----------------------------|
| DNMT3A | 2          | 25244257 | G         | T         | C583*       | 0.07                    | UK Biobank                  |
| DNMT3A | 2          | 25244253 | TG        | T         | Y584X       | 0.15                    | Additional TOPMED - FHS     |
| DNMT3A | 2          | 25244251 | CA        | C         | M585fs      | 0.13                    | Additional TOPMED - FHS     |
| DNMT3A | 2          | 25244250 | A         | AC        | C586fs      | 0.22                    | COPDGene                    |
| DNMT3A | 2          | 25244250 | A         | G         | C586R       | 0.13                    | Additional TOPMED - ARIC    |
| DNMT3A | 2          | 25244249 | C         | CA        | C586fs      | 0.25                    | Additional TOPMED - ARIC    |
| DNMT3A | 2          | 25244248 | G         | T         | C586*       | 0.07                    | UK Biobank                  |
| DNMT3A | 2          | 25244248 | G         | T         | C586*       | 0.04                    | UK Biobank                  |
| DNMT3A | 2          | 25244243 | TG        | T         | H588fs      | 0.04                    | UK Biobank                  |
| DNMT3A | 2          | 25244239 | CT        | C         | K589fs      | 0.22                    | UK Biobank                  |
| DNMT3A | 2          | 25244229 | C         | T         | G593R       | 0.46                    | UK Biobank                  |
| DNMT3A | 2          | 25244222 | A         | G         | L595P       | 0.17                    | Additional TOPMED - ECLIPSE |
| DNMT3A | 2          | 25244222 | A         | G         | L595P       | 0.05                    | UK Biobank                  |
| DNMT3A | 2          | 25244222 | A         | C         | L595R       | 0.43                    | UK Biobank                  |
| DNMT3A | 2          | 25244221 | CA        | C         | L595fs      | 0.26                    | Additional TOPMED - ECLIPSE |
| DNMT3A | 2          | 25244220 | G         | A         | R596W       | 0.03                    | UK Biobank                  |
| DNMT3A | 2          | 25244214 | G         | A         | R598*       | 0.22                    | UK Biobank                  |
| DNMT3A | 2          | 25244214 | G         | A         | R598*       | 0.17                    | UK Biobank                  |
| DNMT3A | 2          | 25244214 | G         | A         | R598*       | 0.13                    | UK Biobank                  |
| DNMT3A | 2          | 25244214 | G         | A         | R598*       | 0.06                    | UK Biobank                  |
| DNMT3A | 2          | 25244214 | G         | A         | R598*       | 0.04                    | UK Biobank                  |
| DNMT3A | 2          | 25244214 | G         | A         | R598*       | 0.04                    | UK Biobank                  |
| DNMT3A | 2          | 25244214 | G         | A         | R598X       | 0.33                    | Additional TOPMED - JHS     |
| DNMT3A | 2          | 25244214 | G         | A         | R598X       | 0.17                    | COPDGene                    |
| DNMT3A | 2          | 25244214 | G         | A         | R598X       | 0.14                    | COPDGene                    |
| DNMT3A | 2          | 25244214 | G         | A         | R598X       | 0.09                    | Additional TOPMED - ARIC    |
| DNMT3A | 2          | 25244211 | C         | A         | E599*       | 0.09                    | UK Biobank                  |
| DNMT3A | 2          | 25244209 | CT        | C         | E599fs      | 0.02                    | UK Biobank                  |
| DNMT3A | 2          | 25244204 | C         | T         | W601*       | 0.05                    | UK Biobank                  |
| DNMT3A | 2          | 25244195 | CG        | C         | R604fs      | 0.22                    | UK Biobank                  |
| DNMT3A | 2          | 25244195 | C         | T         | R604Q       | 0.10                    | UK Biobank                  |
| DNMT3A | 2          | 25244190 | G         | A         | Q606*       | 0.07                    | UK Biobank                  |
| DNMT3A | 2          | 25244190 | G         | A         | Q606*       | 0.03                    | UK Biobank                  |
| DNMT3A | 2          | 25244190 | G         | A         | Q606*       | 0.03                    | UK Biobank                  |
| DNMT3A | 2          | 25244190 | G         | A         | Q606*       | 0.03                    | UK Biobank                  |
| DNMT3A | 2          | 25244179 | GAA       | G         | F609fs      | 0.02                    | UK Biobank                  |
| DNMT3A | 2          | 25244163 | G         | A         | Q615X       | 0.14                    | Additional TOPMED - ECLIPSE |
| DNMT3A | 2          | 25244162 | TG        | T         | Q615fs      | 0.13                    | UK Biobank                  |
| DNMT3A | 2          | 25244160 | C         | A         | E616X       | 0.19                    | Additional TOPMED - MESA    |
| DNMT3A | 2          | 25244159 | TCC       | T         | Q615fs      | 0.21                    | Additional TOPMED - ECLIPSE |
| DNMT3A | 2          | 25244154 | C         | T         | c.1851+1G>A | 0.09                    | COPDGene                    |
| DNMT3A | 2          | 25244154 | C         | T         | c.e15-1G>A  | 0.10                    | UK Biobank                  |
| DNMT3A | 2          | 25244154 | C         | T         | c.e15-1G>A  | 0.08                    | UK Biobank                  |
| DNMT3A | 2          | 25244154 | C         | T         | c.e15-1G>A  | 0.07                    | UK Biobank                  |
| DNMT3A | 2          | 25244154 | C         | T         | c.e15-1G>A  | 0.05                    | UK Biobank                  |
| DNMT3A | 2          | 25244154 | C         | T         | c.e15-1G>A  | 0.04                    | UK Biobank                  |
| DNMT3A | 2          | 25244154 | C         | T         | c.e15-1G>A  | 0.04                    | UK Biobank                  |
| DNMT3A | 2          | 25244154 | C         | T         | c.e15-1G>A  | 0.03                    | UK Biobank                  |
| DNMT3A | 2          | 25244154 | C         | T         | c.e15-1G>A  | 0.03                    | UK Biobank                  |
| DNMT3A | 2          | 25244154 | CA        | C         | c.e15-1TG>G | 0.19                    | UK Biobank                  |
| DNMT3A | 2          | 25244154 | CA        | C         | c.e15-1TG>G | 0.04                    | UK Biobank                  |
| DNMT3A | 2          | 25244153 | A         | T         | c.e15-2T>A  | 0.06                    | UK Biobank                  |
| DNMT3A | 2          | 25244153 | A         | C         | c.e15-2T>G  | 0.40                    | UK Biobank                  |
| DNMT3A | 2          | 25243983 | C         | T         | c.e16+1G>A  | 0.08                    | UK Biobank                  |
| DNMT3A | 2          | 25243965 | G         | C         | Y623*       | 0.05                    | UK Biobank                  |
| DNMT3A | 2          | 25243953 | TG        | T         | P627fs      | 0.10                    | UK Biobank                  |
| DNMT3A | 2          | 25243946 | T         | A         | K630X       | 0.17                    | COPDGene                    |
| DNMT3A | 2          | 25243942 | C         | G         | R631T       | 0.07                    | UK Biobank                  |
| DNMT3A | 2          | 25243936 | G         | T         | P633H       | 0.05                    | UK Biobank                  |
| DNMT3A | 2          | 25243936 | G         | A         | P633L       | 0.13                    | Additional TOPMED - MESA    |
| DNMT3A | 2          | 25243936 | G         | A         | P633L       | 0.05                    | UK Biobank                  |
| DNMT3A | 2          | 25243936 | G         | A         | P633L       | 0.05                    | UK Biobank                  |
| DNMT3A | 2          | 25243934 | T         | A         | I634F       | 0.26                    | UK Biobank                  |
| DNMT3A | 2          | 25243934 | T         | A         | I634F       | 0.16                    | COPDGene                    |
| DNMT3A | 2          | 25243933 | A         | G         | I634T       | 0.25                    | COPDGene                    |
| DNMT3A | 2          | 25243933 | A         | G         | I634T       | 0.16                    | UK Biobank                  |
| DNMT3A | 2          | 25243933 | A         | G         | I634T       | 0.04                    | UK Biobank                  |
| DNMT3A | 2          | 25243931 | G         | C         | R635G       | 0.18                    | UK Biobank                  |
| DNMT3A | 2          | 25243931 | G         | C         | R635G       | 0.10                    | UK Biobank                  |
| DNMT3A | 2          | 25243931 | G         | C         | R635G       | 0.06                    | UK Biobank                  |
| DNMT3A | 2          | 25243931 | G         | A         | R635W       | 0.35                    | COPDGene                    |
| DNMT3A | 2          | 25243931 | G         | A         | R635W       | 0.33                    | UK Biobank                  |
| DNMT3A | 2          | 25243931 | G         | A         | R635W       | 0.29                    | UK Biobank                  |
| DNMT3A | 2          | 25243931 | G         | A         | R635W       | 0.25                    | COPDGene                    |
| DNMT3A | 2          | 25243931 | G         | A         | R635W       | 0.20                    | Additional TOPMED - JHS     |
| DNMT3A | 2          | 25243931 | G         | A         | R635W       | 0.19                    | UK Biobank                  |
| DNMT3A | 2          | 25243931 | G         | A         | R635W       | 0.16                    | UK Biobank                  |
| DNMT3A | 2          | 25243931 | G         | A         | R635W       | 0.16                    | UK Biobank                  |
| DNMT3A | 2          | 25243931 | G         | A         | R635W       | 0.13                    | UK Biobank                  |
| DNMT3A | 2          | 25243931 | G         | A         | R635W       | 0.12                    | UK Biobank                  |
| DNMT3A | 2          | 25243931 | G         | A         | R635W       | 0.06                    | UK Biobank                  |
| DNMT3A | 2          | 25243931 | G         | A         | R635W       | 0.06                    | UK Biobank                  |
| DNMT3A | 2          | 25243931 | G         | A         | R635W       | 0.05                    | UK Biobank                  |
| DNMT3A | 2          | 25243930 | C         | A         | R635L       | 0.21                    | Additional TOPMED - FHS     |
| DNMT3A | 2          | 25243930 | C         | G         | R635P       | 0.35                    | Additional TOPMED - FHS     |
| DNMT3A | 2          | 25243930 | C         | G         | R635P       | 0.12                    | UK Biobank                  |
| DNMT3A | 2          | 25243930 | C         | G         | R635P       | 0.09                    | UK Biobank                  |
| DNMT3A | 2          | 25243930 | C         | T         | R635Q       | 0.50                    | Additional TOPMED - ARIC    |
| DNMT3A | 2          | 25243930 | C         | T         | R635Q       | 0.26                    | COPDGene                    |
| DNMT3A | 2          | 25243930 | C         | T         | R635Q       | 0.25                    | UK Biobank                  |
| DNMT3A | 2          | 25243930 | C         | T         | R635Q       | 0.20                    | COPDGene                    |
| DNMT3A | 2          | 25243930 | C         | T         | R635Q       | 0.17                    | Additional TOPMED - ECLIPSE |
| DNMT3A | 2          | 25243930 | C         | T         | R635Q       | 0.10                    | UK Biobank                  |
| DNMT3A | 2          | 25243930 | C         | T         | R635Q       | 0.04                    | UK Biobank                  |
| DNMT3A | 2          | 25243930 | C         | T         | R635Q       | 0.04                    | UK Biobank                  |
| DNMT3A | 2          | 25243930 | C         | T         | R635Q       | 0.03                    | UK Biobank                  |
| DNMT3A | 2          | 25243930 | C         | T         | R635Q       | 0.03                    | UK Biobank                  |
| DNMT3A | 2          | 25243930 | C         | T         | R635Q       | 0.03                    | UK Biobank                  |
| DNMT3A | 2          | 25243928 | C         | A         | V636L       | 0.13                    | COPDGene                    |



| Gene   | Chromosome | Position | Reference | Alternate | Consequence  | Variant Allele Fraction | Cohort                      |
|--------|------------|----------|-----------|-----------|--------------|-------------------------|-----------------------------|
| DNMT3A | 2          | 25243928 | C         | A         | V636L        | 0.08                    | UK Biobank                  |
| DNMT3A | 2          | 25243928 | C         | A         | V636L        | 0.04                    | UK Biobank                  |
| DNMT3A | 2          | 25243928 | C         | T         | V636M        | 0.37                    | Additional TOPMED - MESA    |
| DNMT3A | 2          | 25243928 | C         | T         | V636M        | 0.30                    | Additional TOPMED - MESA    |
| DNMT3A | 2          | 25243928 | C         | T         | V636M        | 0.13                    | Additional TOPMED - MESA    |
| DNMT3A | 2          | 25243928 | C         | T         | V636M        | 0.11                    | COPDGene                    |
| DNMT3A | 2          | 25243928 | C         | T         | V636M        | 0.10                    | UK Biobank                  |
| DNMT3A | 2          | 25243928 | C         | T         | V636M        | 0.09                    | UK Biobank                  |
| DNMT3A | 2          | 25243928 | C         | T         | V636M        | 0.06                    | Additional TOPMED - ARIC    |
| DNMT3A | 2          | 25243928 | C         | T         | V636M        | 0.05                    | UK Biobank                  |
| DNMT3A | 2          | 25243927 | A         | T         | V636E        | 0.04                    | UK Biobank                  |
| DNMT3A | 2          | 25243924 | A         | G         | L637P        | 0.29                    | Additional TOPMED - MESA    |
| DNMT3A | 2          | 25243924 | A         | T         | L637Q        | 0.27                    | UK Biobank                  |
| DNMT3A | 2          | 25243924 | A         | T         | L637Q        | 0.21                    | COPDGene                    |
| DNMT3A | 2          | 25243924 | A         | T         | L637Q        | 0.09                    | UK Biobank                  |
| DNMT3A | 2          | 25243924 | A         | C         | L637R        | 0.49                    | UK Biobank                  |
| DNMT3A | 2          | 25243924 | A         | C         | L637R        | 0.27                    | Additional TOPMED - ARIC    |
| DNMT3A | 2          | 25243924 | A         | C         | L637R        | 0.14                    | Additional TOPMED - ARIC    |
| DNMT3A | 2          | 25243922 | AC        | A         | S638fs       | 0.07                    | UK Biobank                  |
| DNMT3A | 2          | 25243921 | G         | A         | S638F        | 0.30                    | UK Biobank                  |
| DNMT3A | 2          | 25243921 | G         | T         | S638Y        | 0.27                    | UK Biobank                  |
| DNMT3A | 2          | 25243920 | AG        | A         | S638fs       | 0.08                    | Additional TOPMED - JHS     |
| DNMT3A | 2          | 25243919 | G         | A         | L639F        | 0.04                    | UK Biobank                  |
| DNMT3A | 2          | 25243917 | GA        | G         | L639fs       | 0.13                    | UK Biobank                  |
| DNMT3A | 2          | 25243916 | A         | G         | F640L        | 0.05                    | UK Biobank                  |
| DNMT3A | 2          | 25243913 | C         | A         | D641Y        | 0.13                    | UK Biobank                  |
| DNMT3A | 2          | 25243913 | C         | A         | D641Y        | 0.06                    | UK Biobank                  |
| DNMT3A | 2          | 25243910 | C         | T         | G642R        | 0.09                    | UK Biobank                  |
| DNMT3A | 2          | 25243907 | T         | TTCCA     | I643fs       | 0.28                    | UK Biobank                  |
| DNMT3A | 2          | 25243906 | A         | G         | I643T        | 0.18                    | UK Biobank                  |
| DNMT3A | 2          | 25243905 | G         | GA        | A644fs       | 0.15                    | UK Biobank                  |
| DNMT3A | 2          | 25243905 | GA        | G         | I643fs       | 0.04                    | UK Biobank                  |
| DNMT3A | 2          | 25243897 | C         | G         | c.1369+1G>C  | 0.18                    | Additional TOPMED - MESA    |
| DNMT3A | 2          | 25243897 | C         | T         | c.e16-1G>A   | 0.15                    | UK Biobank                  |
| DNMT3A | 2          | 25241709 | T         | C         | c.e17+2A>G   | 0.07                    | UK Biobank                  |
| DNMT3A | 2          | 25241708 | C         | T         | c.1937-1G>A  | 0.20                    | COPDGene                    |
| DNMT3A | 2          | 25241708 | C         | G         | c.1937-1G>C  | 0.13                    | Additional TOPMED - JHS     |
| DNMT3A | 2          | 25241708 | C         | G         | c.1937-1G>C  | 0.12                    | Additional TOPMED - JHS     |
| DNMT3A | 2          | 25241708 | C         | T         | c.e17+1G>A   | 0.47                    | UK Biobank                  |
| DNMT3A | 2          | 25241708 | C         | T         | c.e17+1G>A   | 0.11                    | UK Biobank                  |
| DNMT3A | 2          | 25241708 | C         | T         | c.e17+1G>A   | 0.04                    | UK Biobank                  |
| DNMT3A | 2          | 25241707 | CC        | AA        | c.e17+0GG>TT | 0.40                    | UK Biobank                  |
| DNMT3A | 2          | 25241707 | C         | T         | G646E        | 0.11                    | COPDGene                    |
| DNMT3A | 2          | 25241705 | G         | T         | L647I        | 0.04                    | UK Biobank                  |
| DNMT3A | 2          | 25241704 | A         | T         | L647H        | 0.11                    | COPDGene                    |
| DNMT3A | 2          | 25241704 | A         | G         | L647P        | 0.13                    | UK Biobank                  |
| DNMT3A | 2          | 25241704 | A         | G         | L647P        | 0.06                    | UK Biobank                  |
| DNMT3A | 2          | 25241704 | A         | G         | L647P        | 0.04                    | UK Biobank                  |
| DNMT3A | 2          | 25241704 | A         | C         | L647R        | 0.42                    | COPDGene                    |
| DNMT3A | 2          | 25241704 | A         | C         | L647R        | 0.16                    | Additional TOPMED - ECLIPSE |
| DNMT3A | 2          | 25241704 | A         | C         | L647R        | 0.06                    | UK Biobank                  |
| DNMT3A | 2          | 25241699 | C         | G         | V649L        | 0.03                    | UK Biobank                  |
| DNMT3A | 2          | 25241699 | C         | T         | V649M        | 0.10                    | UK Biobank                  |
| DNMT3A | 2          | 25241699 | C         | T         | V649M        | 0.08                    | UK Biobank                  |
| DNMT3A | 2          | 25241697 | CA        | C         | V649fs       | 0.09                    | UK Biobank                  |
| DNMT3A | 2          | 25241695 | A         | G         | L650P        | 0.10                    | UK Biobank                  |
| DNMT3A | 2          | 25241695 | A         | T         | L650Q        | 0.05                    | UK Biobank                  |
| DNMT3A | 2          | 25241695 | A         | C         | L650R        | 0.06                    | UK Biobank                  |
| DNMT3A | 2          | 25241694 | C         | CA        | K651fs       | 0.34                    | UK Biobank                  |
| DNMT3A | 2          | 25241691 | CT        | C         | K651fs       | 0.32                    | UK Biobank                  |
| DNMT3A | 2          | 25241688 | GT        | G         | D652fs       | 0.04                    | UK Biobank                  |
| DNMT3A | 2          | 25241687 | AG        | A         | L653fs       | 0.07                    | UK Biobank                  |
| DNMT3A | 2          | 25241687 | A         | C         | L653V        | 0.08                    | UK Biobank                  |
| DNMT3A | 2          | 25241686 | A         | G         | L653S        | 0.05                    | UK Biobank                  |
| DNMT3A | 2          | 25241686 | A         | G         | L653S        | 0.04                    | UK Biobank                  |
| DNMT3A | 2          | 25241686 | A         | C         | L653W        | 0.20                    | COPDGene                    |
| DNMT3A | 2          | 25241686 | A         | C         | L653W        | 0.12                    | Additional TOPMED - MESA    |
| DNMT3A | 2          | 25241686 | A         | T         | L653X        | 0.36                    | COPDGene                    |
| DNMT3A | 2          | 25241685 | C         | G         | L653F        | 0.06                    | UK Biobank                  |
| DNMT3A | 2          | 25241684 | C         | T         | G654S        | 0.04                    | UK Biobank                  |
| DNMT3A | 2          | 25241678 | G         | A         | Q656*        | 0.06                    | UK Biobank                  |
| DNMT3A | 2          | 25241675 | C         | T         | V657M        | 0.21                    | COPDGene                    |
| DNMT3A | 2          | 25241675 | C         | T         | V657M        | 0.16                    | UK Biobank                  |
| DNMT3A | 2          | 25241675 | C         | T         | V657M        | 0.09                    | Additional TOPMED - MESA    |
| DNMT3A | 2          | 25241675 | C         | T         | V657M        | 0.05                    | UK Biobank                  |
| DNMT3A | 2          | 25241675 | C         | T         | V657M        | 0.04                    | UK Biobank                  |
| DNMT3A | 2          | 25241675 | C         | T         | V657M        | 0.03                    | UK Biobank                  |
| DNMT3A | 2          | 25241675 | C         | T         | V657M        | 0.03                    | UK Biobank                  |
| DNMT3A | 2          | 25241672 | CC        | AA        | D658Y        | 0.04                    | UK Biobank                  |
| DNMT3A | 2          | 25241670 | G         | T         | D658E        | 0.04                    | UK Biobank                  |
| DNMT3A | 2          | 25241669 | G         | C         | R659G        | 0.24                    | Additional TOPMED - JHS     |
| DNMT3A | 2          | 25241668 | C         | T         | R659H        | 0.19                    | UK Biobank                  |
| DNMT3A | 2          | 25241668 | C         | T         | R659H        | 0.11                    | UK Biobank                  |
| DNMT3A | 2          | 25241668 | C         | T         | R659H        | 0.09                    | Additional TOPMED - FHS     |
| DNMT3A | 2          | 25241666 | A         | C         | Y660D        | 0.12                    | Additional TOPMED - FHS     |
| DNMT3A | 2          | 25241666 | A         | G         | Y660H        | 0.11                    | UK Biobank                  |
| DNMT3A | 2          | 25241666 | A         | G         | Y660H        | 0.11                    | Additional TOPMED - ECLIPSE |
| DNMT3A | 2          | 25241666 | A         | G         | Y660H        | 0.03                    | UK Biobank                  |
| DNMT3A | 2          | 25241665 | T         | C         | Y660C        | 0.06                    | UK Biobank                  |
| DNMT3A | 2          | 25241665 | T         | C         | Y660C        | 0.05                    | UK Biobank                  |
| DNMT3A | 2          | 25241665 | T         | G         | Y660S        | 0.07                    | UK Biobank                  |
| DNMT3A | 2          | 25241662 | A         | T         | I661N        | 0.15                    | UK Biobank                  |
| DNMT3A | 2          | 25241662 | A         | C         | I661S        | 0.23                    | UK Biobank                  |
| DNMT3A | 2          | 25241656 | G         | C         | S663W        | 0.13                    | Additional TOPMED - MESA    |
| DNMT3A | 2          | 25241655 | CGAGGCAAT | C         | I661fs       | 0.28                    | COPDGene                    |
| DNMT3A | 2          | 25241651 | C         | T         | V665M        | 0.10                    | UK Biobank                  |
| DNMT3A | 2          | 25241650 | A         | C         | V665G        | 0.32                    | UK Biobank                  |
| DNMT3A | 2          | 25241644 | TCA       | T         | C666fs       | 0.06                    | UK Biobank                  |
| DNMT3A | 2          | 25241641 | TC        | T         | D668fs       | 0.06                    | UK Biobank                  |

| Gene   | Chromosome | Position | Reference | Alternate | Consequence | Variant Allele Fraction | Cohort                      |
|--------|------------|----------|-----------|-----------|-------------|-------------------------|-----------------------------|
| DNMT3A | 2          | 25241638 | G         | A         | S669F       | 0.08                    | UK Biobank                  |
| DNMT3A | 2          | 25241638 | G         | A         | S669F       | 0.02                    | UK Biobank                  |
| DNMT3A | 2          | 25241638 | G         | T         | S669Y       | 0.21                    | UK Biobank                  |
| DNMT3A | 2          | 25241636 | T         | TG        | I670fs      | 0.24                    | UK Biobank                  |
| DNMT3A | 2          | 25241621 | C         | T         | V675M       | 0.28                    | Additional TOPMED - CFS     |
| DNMT3A | 2          | 25241621 | C         | T         | V675M       | 0.05                    | UK Biobank                  |
| DNMT3A | 2          | 25241618 | G         | C         | R676G       | 0.11                    | UK Biobank                  |
| DNMT3A | 2          | 25241618 | G         | A         | R676W       | 0.05                    | UK Biobank                  |
| DNMT3A | 2          | 25241618 | G         | A         | R676W       | 0.04                    | UK Biobank                  |
| DNMT3A | 2          | 25241618 | G         | A         | R676W       | 0.03                    | UK Biobank                  |
| DNMT3A | 2          | 25241618 | G         | A         | R676W       | 0.03                    | UK Biobank                  |
| DNMT3A | 2          | 25241616 | C         | CCG       | R676fs      | 0.13                    | Additional TOPMED - ECLIPSE |
| DNMT3A | 2          | 25241612 | G         | A         | Q678X       | 0.14                    | COPDGene                    |
| DNMT3A | 2          | 25241606 | TC        | T         | K680fs      | 0.18                    | UK Biobank                  |
| DNMT3A | 2          | 25241604 | C         | G         | K680N       | 0.04                    | UK Biobank                  |
| DNMT3A | 2          | 25241601 | G         | C         | I681M       | 0.08                    | UK Biobank                  |
| DNMT3A | 2          | 25241600 | TG        | T         | I681fs      | 0.45                    | Additional TOPMED - ECLIPSE |
| DNMT3A | 2          | 25241600 | TG        | T         | M682fs      | 0.06                    | UK Biobank                  |
| DNMT3A | 2          | 25241597 | A         | C         | Y683D       | 0.15                    | COPDGene                    |
| DNMT3A | 2          | 25241595 | G         | T         | Y683*       | 0.06                    | UK Biobank                  |
| DNMT3A | 2          | 25241595 | G         | T         | Y683*       | 0.02                    | UK Biobank                  |
| DNMT3A | 2          | 25241594 | C         | A         | V684F       | 0.07                    | Additional TOPMED - ARIC    |
| DNMT3A | 2          | 25241593 | A         | T         | V684D       | 0.06                    | UK Biobank                  |
| DNMT3A | 2          | 25241591 | C         | G         | G685R       | 0.16                    | COPDGene                    |
| DNMT3A | 2          | 25241591 | C         | G         | G685R       | 0.06                    | UK Biobank                  |
| DNMT3A | 2          | 25241591 | C         | T         | G685R       | 0.04                    | UK Biobank                  |
| DNMT3A | 2          | 25241591 | C         | T         | G685R       | 0.04                    | UK Biobank                  |
| DNMT3A | 2          | 25241591 | C         | T         | G685R       | 0.04                    | UK Biobank                  |
| DNMT3A | 2          | 25241591 | C         | T         | G685R       | 0.03                    | UK Biobank                  |
| DNMT3A | 2          | 25241591 | C         | A         | G685W       | 0.05                    | UK Biobank                  |
| DNMT3A | 2          | 25241590 | C         | T         | G685E       | 0.12                    | UK Biobank                  |
| DNMT3A | 2          | 25241590 | C         | T         | G685E       | 0.10                    | UK Biobank                  |
| DNMT3A | 2          | 25241590 | C         | T         | G685E       | 0.06                    | UK Biobank                  |
| DNMT3A | 2          | 25241588 | C         | G         | D686H       | 0.06                    | UK Biobank                  |
| DNMT3A | 2          | 25241587 | T         | C         | D686G       | 0.11                    | UK Biobank                  |
| DNMT3A | 2          | 25241587 | T         | A         | D686V       | 0.23                    | Additional TOPMED - FHS     |
| DNMT3A | 2          | 25241586 | G         | C         | D686E       | 0.10                    | UK Biobank                  |
| DNMT3A | 2          | 25241586 | G         | T         | D686E       | 0.03                    | UK Biobank                  |
| DNMT3A | 2          | 25241585 | C         | A         | V687F       | 0.17                    | Additional TOPMED - MESA    |
| DNMT3A | 2          | 25241585 | C         | A         | V687F       | 0.12                    | COPDGene                    |
| DNMT3A | 2          | 25241585 | C         | A         | V687F       | 0.03                    | UK Biobank                  |
| DNMT3A | 2          | 25241582 | G         | A         | R688C       | 0.15                    | UK Biobank                  |
| DNMT3A | 2          | 25241582 | G         | A         | R688C       | 0.14                    | COPDGene                    |
| DNMT3A | 2          | 25241582 | G         | A         | R688C       | 0.04                    | UK Biobank                  |
| DNMT3A | 2          | 25241582 | G         | A         | R688C       | 0.03                    | UK Biobank                  |
| DNMT3A | 2          | 25241582 | G         | T         | R688S       | 0.04                    | UK Biobank                  |
| DNMT3A | 2          | 25241581 | C         | T         | R688H       | 0.20                    | COPDGene                    |
| DNMT3A | 2          | 25241581 | C         | T         | R688H       | 0.14                    | COPDGene                    |
| DNMT3A | 2          | 25241581 | C         | T         | R688H       | 0.11                    | Additional TOPMED - MESA    |
| DNMT3A | 2          | 25241581 | C         | T         | R688H       | 0.10                    | Additional TOPMED - ARIC    |
| DNMT3A | 2          | 25241581 | C         | T         | R688H       | 0.08                    | COPDGene                    |
| DNMT3A | 2          | 25241581 | C         | T         | R688H       | 0.04                    | UK Biobank                  |
| DNMT3A | 2          | 25241581 | C         | A         | R688L       | 0.25                    | UK Biobank                  |
| DNMT3A | 2          | 25241576 | C         | A         | V690F       | 0.11                    | UK Biobank                  |
| DNMT3A | 2          | 25241575 | A         | C         | V690G       | 0.11                    | Additional TOPMED - MESA    |
| DNMT3A | 2          | 25241575 | A         | C         | V690G       | 0.05                    | UK Biobank                  |
| DNMT3A | 2          | 25241572 | G         | A         | T691I       | 0.23                    | COPDGene                    |
| DNMT3A | 2          | 25241568 | CTG       | C         | Q692fs      | 0.15                    | Additional TOPMED - MESA    |
| DNMT3A | 2          | 25241567 | T         | A         | K693*       | 0.04                    | UK Biobank                  |
| DNMT3A | 2          | 25241565 | C         | CTTA      | 692_693insN | 0.10                    | UK Biobank                  |
| DNMT3A | 2          | 25241564 | G         | A         | H694Y       | 0.10                    | COPDGene                    |
| DNMT3A | 2          | 25241561 | C         | T         | c.e17-1G>A  | 0.07                    | UK Biobank                  |
| DNMT3A | 2          | 25241560 | A         | G         | c.1515+2T>C | 0.25                    | Additional TOPMED - MESA    |
| DNMT3A | 2          | 25240732 | T         | C         | c.1516-2A>G | 0.09                    | COPDGene                    |
| DNMT3A | 2          | 25240731 | C         | G         | c.1516-1G>C | 0.16                    | Additional TOPMED - MESA    |
| DNMT3A | 2          | 25240731 | C         | G         | c.e18+1G>C  | 0.39                    | UK Biobank                  |
| DNMT3A | 2          | 25240726 | TG        | T         | Q696fs      | 0.25                    | Additional TOPMED - ECLIPSE |
| DNMT3A | 2          | 25240726 | TG        | T         | Q696fs      | 0.22                    | Additional TOPMED - JHS     |
| DNMT3A | 2          | 25240726 | TG        | T         | Q696fs      | 0.09                    | Additional TOPMED - ECLIPSE |
| DNMT3A | 2          | 25240720 | C         | G         | W698S       | 0.16                    | UK Biobank                  |
| DNMT3A | 2          | 25240720 | C         | G         | W698S       | 0.14                    | UK Biobank                  |
| DNMT3A | 2          | 25240720 | C         | G         | W698S       | 0.06                    | UK Biobank                  |
| DNMT3A | 2          | 25240719 | C         | T         | W698*       | 0.06                    | UK Biobank                  |
| DNMT3A | 2          | 25240719 | C         | G         | W698C       | 0.12                    | COPDGene                    |
| DNMT3A | 2          | 25240719 | C         | T         | W698X       | 0.18                    | Additional TOPMED - MESA    |
| DNMT3A | 2          | 25240718 | C         | G         | G699R       | 0.23                    | COPDGene                    |
| DNMT3A | 2          | 25240718 | C         | T         | G699S       | 0.28                    | Additional TOPMED - ECLIPSE |
| DNMT3A | 2          | 25240718 | C         | T         | G699S       | 0.17                    | COPDGene                    |
| DNMT3A | 2          | 25240717 | C         | C         | G699D       | 0.41                    | COPDGene                    |
| DNMT3A | 2          | 25240717 | C         | T         | G699D       | 0.21                    | UK Biobank                  |
| DNMT3A | 2          | 25240717 | C         | T         | G699D       | 0.15                    | Additional TOPMED - JHS     |
| DNMT3A | 2          | 25240717 | C         | T         | G699D       | 0.15                    | UK Biobank                  |
| DNMT3A | 2          | 25240717 | C         | T         | G699D       | 0.08                    | COPDGene                    |
| DNMT3A | 2          | 25240717 | C         | A         | G699V       | 0.05                    | UK Biobank                  |
| DNMT3A | 2          | 25240716 | GC        | G         | G699fs      | 0.24                    | COPDGene                    |
| DNMT3A | 2          | 25240716 | GC        | G         | G699fs      | 0.06                    | UK Biobank                  |
| DNMT3A | 2          | 25240715 | G         | C         | P700A       | 0.17                    | COPDGene                    |
| DNMT3A | 2          | 25240715 | G         | T         | P700T       | 0.21                    | Additional TOPMED - JHS     |
| DNMT3A | 2          | 25240714 | G         | A         | P700L       | 0.35                    | COPDGene                    |
| DNMT3A | 2          | 25240714 | G         | A         | P700L       | 0.07                    | UK Biobank                  |
| DNMT3A | 2          | 25240714 | G         | C         | P700R       | 0.12                    | Additional TOPMED - ECLIPSE |
| DNMT3A | 2          | 25240710 | G         | GA        | F701fs      | 0.51                    | COPDGene                    |
| DNMT3A | 2          | 25240708 | T         | C         | D702G       | 0.13                    | UK Biobank                  |
| DNMT3A | 2          | 25240708 | T         | A         | D702V       | 0.08                    | COPDGene                    |
| DNMT3A | 2          | 25240706 | G         | C         | L703V       | 0.11                    | COPDGene                    |
| DNMT3A | 2          | 25240705 | A         | G         | L703P       | 0.08                    | UK Biobank                  |
| DNMT3A | 2          | 25240702 | A         | G         | V704A       | 0.17                    | COPDGene                    |
| DNMT3A | 2          | 25240699 | A         | T         | I705N       | 0.07                    | UK Biobank                  |
| DNMT3A | 2          | 25240699 | A         | T         | I705N       | 0.06                    | UK Biobank                  |

| Gene   | Chromosome | Position | Reference         | Alternate | Consequence | Variant Allele Fraction | Cohort                      |
|--------|------------|----------|-------------------|-----------|-------------|-------------------------|-----------------------------|
| DNMT3A | 2          | 25240699 | A                 | C         | I705S       | 0.06                    | COPDGene                    |
| DNMT3A | 2          | 25240699 | A                 | G         | I705T       | 0.16                    | UK Biobank                  |
| DNMT3A | 2          | 25240699 | A                 | G         | I705T       | 0.08                    | Additional TOPMED - FHS     |
| DNMT3A | 2          | 25240699 | A                 | G         | I705T       | 0.06                    | UK Biobank                  |
| DNMT3A | 2          | 25240699 | A                 | G         | I705T       | 0.05                    | UK Biobank                  |
| DNMT3A | 2          | 25240699 | A                 | G         | I705T       | 0.05                    | UK Biobank                  |
| DNMT3A | 2          | 25240697 | C                 | A         | G706W       | 0.11                    | Additional TOPMED - FHS     |
| DNMT3A | 2          | 25240697 | CA                | C         | I705fs      | 0.21                    | UK Biobank                  |
| DNMT3A | 2          | 25240697 | CA                | C         | I705fs      | 0.13                    | COPDGene                    |
| DNMT3A | 2          | 25240697 | CA                | C         | I705fs      | 0.10                    | COPDGene                    |
| DNMT3A | 2          | 25240696 | C                 | T         | G706E       | 0.19                    | Additional TOPMED - ARIC    |
| DNMT3A | 2          | 25240696 | C                 | T         | G706E       | 0.12                    | COPDGene                    |
| DNMT3A | 2          | 25240693 | C                 | T         | G707D       | 0.19                    | COPDGene                    |
| DNMT3A | 2          | 25240693 | C                 | T         | G707D       | 0.13                    | Additional TOPMED - ARIC    |
| DNMT3A | 2          | 25240693 | C                 | T         | G707D       | 0.11                    | UK Biobank                  |
| DNMT3A | 2          | 25240693 | C                 | T         | G707D       | 0.04                    | UK Biobank                  |
| DNMT3A | 2          | 25240692 | GC                | G         | G707fs      | 0.21                    | COPDGene                    |
| DNMT3A | 2          | 25240692 | GC                | G         | G707fs      | 0.10                    | UK Biobank                  |
| DNMT3A | 2          | 25240692 | GC                | G         | G707fs      | 0.05                    | UK Biobank                  |
| DNMT3A | 2          | 25240692 | GCC               | G         | G707fs      | 0.05                    | UK Biobank                  |
| DNMT3A | 2          | 25240685 | A                 | T         | C710S       | 0.40                    | UK Biobank                  |
| DNMT3A | 2          | 25240683 | G                 | T         | C710*       | 0.22                    | UK Biobank                  |
| DNMT3A | 2          | 25240678 | TCATTGCAGGGACTGCC | T         | G707fs      | 0.04                    | UK Biobank                  |
| DNMT3A | 2          | 25240677 | G                 | GT        | D712fs      | 0.06                    | UK Biobank                  |
| DNMT3A | 2          | 25240675 | A                 | AC        | L713fs      | 0.15                    | COPDGene                    |
| DNMT3A | 2          | 25240674 | GA                | LM        | L713fs      | 0.12                    | Additional TOPMED - MESA    |
| DNMT3A | 2          | 25240672 | G                 | C         | S714C       | 0.22                    | UK Biobank                  |
| DNMT3A | 2          | 25240672 | G                 | C         | S714C       | 0.16                    | Additional TOPMED - CFS     |
| DNMT3A | 2          | 25240672 | G                 | C         | S714C       | 0.13                    | Additional TOPMED - ECLIPSE |
| DNMT3A | 2          | 25240672 | G                 | C         | S714C       | 0.12                    | Additional TOPMED - JHS     |
| DNMT3A | 2          | 25240672 | G                 | C         | S714C       | 0.11                    | UK Biobank                  |
| DNMT3A | 2          | 25240672 | G                 | C         | S714C       | 0.07                    | UK Biobank                  |
| DNMT3A | 2          | 25240672 | G                 | C         | S714C       | 0.04                    | UK Biobank                  |
| DNMT3A | 2          | 25240670 | T                 | TG        | I715fs      | 0.07                    | UK Biobank                  |
| DNMT3A | 2          | 25240669 | ATGGAGAGG         | A         | L713fs      | 0.18                    | UK Biobank                  |
| DNMT3A | 2          | 25240668 | GAT               | G         | I715fs      | 0.13                    | UK Biobank                  |
| DNMT3A | 2          | 25240667 | C                 | T         | V716I       | 0.30                    | UK Biobank                  |
| DNMT3A | 2          | 25240667 | C                 | T         | V716I       | 0.17                    | UK Biobank                  |
| DNMT3A | 2          | 25240667 | C                 | T         | V716I       | 0.15                    | COPDGene                    |
| DNMT3A | 2          | 25240667 | C                 | T         | V716I       | 0.10                    | COPDGene                    |
| DNMT3A | 2          | 25240667 | C                 | T         | V716I       | 0.05                    | UK Biobank                  |
| DNMT3A | 2          | 25240666 | A                 | T         | V716D       | 0.27                    | Additional TOPMED - JHS     |
| DNMT3A | 2          | 25240666 | A                 | T         | V716D       | 0.21                    | COPDGene                    |
| DNMT3A | 2          | 25240663 | T                 | A         | N717I       | 0.12                    | COPDGene                    |
| DNMT3A | 2          | 25240663 | T                 | A         | N717S       | 0.05                    | UK Biobank                  |
| DNMT3A | 2          | 25240649 | C                 | CCTTGCGA  | G722fs      | 0.15                    | COPDGene                    |
| DNMT3A | 2          | 25240641 | G                 | T         | Y724*       | 0.18                    | UK Biobank                  |
| DNMT3A | 2          | 25240640 | C                 | T         | E725K       | 0.13                    | Additional TOPMED - JHS     |
| DNMT3A | 2          | 25240639 | C                 | T         | c.1606+1G>A | 0.15                    | Additional TOPMED - ARIC    |
| DNMT3A | 2          | 25240639 | C                 | T         | c.1606+1G>A | 0.11                    | Additional TOPMED - ECLIPSE |
| DNMT3A | 2          | 25240639 | C                 | T         | c.2173+1G>A | 0.15                    | COPDGene                    |
| DNMT3A | 2          | 25240639 | C                 | T         | c.e18-1G>A  | 0.09                    | UK Biobank                  |
| DNMT3A | 2          | 25240639 | C                 | T         | c.e18-1G>A  | 0.09                    | UK Biobank                  |
| DNMT3A | 2          | 25240638 | AC                | A         | c.1606+1G>- | 0.11                    | Additional TOPMED - CFS     |
| DNMT3A | 2          | 25240638 | AC                | A         | c.e18-2GT>T | 0.31                    | UK Biobank                  |
| DNMT3A | 2          | 25240452 | T                 | C         | c.e19+2A>G  | 0.06                    | UK Biobank                  |
| DNMT3A | 2          | 25240452 | T                 | C         | c.e19+2A>G  | 0.06                    | UK Biobank                  |
| DNMT3A | 2          | 25240451 | T                 | T         | c.e19+1G>A  | 0.08                    | UK Biobank                  |
| DNMT3A | 2          | 25240448 | CCT               | C         | E725fs      | 0.10                    | Additional TOPMED - MESA    |
| DNMT3A | 2          | 25240447 | C                 | A         | G726V       | 0.13                    | COPDGene                    |
| DNMT3A | 2          | 25240440 | GC                | G         | G728fs      | 0.16                    | COPDGene                    |
| DNMT3A | 2          | 25240439 | G                 | C         | R729G       | 0.18                    | UK Biobank                  |
| DNMT3A | 2          | 25240439 | G                 | C         | R729G       | 0.17                    | UK Biobank                  |
| DNMT3A | 2          | 25240439 | G                 | C         | R729G       | 0.16                    | COPDGene                    |
| DNMT3A | 2          | 25240439 | G                 | C         | R729G       | 0.12                    | Additional TOPMED - JHS     |
| DNMT3A | 2          | 25240439 | G                 | A         | R729W       | 0.25                    | UK Biobank                  |
| DNMT3A | 2          | 25240439 | G                 | A         | R729W       | 0.24                    | COPDGene                    |
| DNMT3A | 2          | 25240439 | G                 | A         | R729W       | 0.23                    | COPDGene                    |
| DNMT3A | 2          | 25240439 | G                 | A         | R729W       | 0.20                    | UK Biobank                  |
| DNMT3A | 2          | 25240439 | G                 | A         | R729W       | 0.14                    | UK Biobank                  |
| DNMT3A | 2          | 25240439 | G                 | A         | R729W       | 0.13                    | COPDGene                    |
| DNMT3A | 2          | 25240439 | G                 | A         | R729W       | 0.12                    | COPDGene                    |
| DNMT3A | 2          | 25240439 | G                 | A         | R729W       | 0.10                    | Additional TOPMED - FHS     |
| DNMT3A | 2          | 25240439 | G                 | A         | R729W       | 0.09                    | Additional TOPMED - JHS     |
| DNMT3A | 2          | 25240439 | G                 | A         | R729W       | 0.07                    | UK Biobank                  |
| DNMT3A | 2          | 25240439 | G                 | A         | R729W       | 0.07                    | UK Biobank                  |
| DNMT3A | 2          | 25240439 | G                 | A         | R729W       | 0.05                    | UK Biobank                  |
| DNMT3A | 2          | 25240439 | G                 | A         | R729W       | 0.05                    | UK Biobank                  |
| DNMT3A | 2          | 25240439 | G                 | A         | R729W       | 0.05                    | UK Biobank                  |
| DNMT3A | 2          | 25240439 | G                 | A         | R729W       | 0.04                    | UK Biobank                  |
| DNMT3A | 2          | 25240439 | G                 | A         | R729W       | 0.03                    | UK Biobank                  |
| DNMT3A | 2          | 25240439 | G                 | A         | R729W       | 0.03                    | UK Biobank                  |
| DNMT3A | 2          | 25240438 | C                 | G         | R729P       | 0.11                    | UK Biobank                  |
| DNMT3A | 2          | 25240438 | C                 | T         | R729Q       | 0.45                    | Additional TOPMED - MESA    |
| DNMT3A | 2          | 25240438 | C                 | T         | R729Q       | 0.32                    | UK Biobank                  |
| DNMT3A | 2          | 25240438 | C                 | T         | R729Q       | 0.11                    | Additional TOPMED - ARIC    |
| DNMT3A | 2          | 25240438 | C                 | T         | R729Q       | 0.10                    | UK Biobank                  |
| DNMT3A | 2          | 25240438 | C                 | T         | R729Q       | 0.10                    | COPDGene                    |
| DNMT3A | 2          | 25240438 | C                 | T         | R729Q       | 0.09                    | Additional TOPMED - FHS     |
| DNMT3A | 2          | 25240438 | C                 | T         | R729Q       | 0.06                    | UK Biobank                  |
| DNMT3A | 2          | 25240438 | C                 | T         | R729Q       | 0.05                    | UK Biobank                  |
| DNMT3A | 2          | 25240438 | C                 | T         | R729Q       | 0.04                    | UK Biobank                  |
| DNMT3A | 2          | 25240438 | C                 | T         | R729Q       | 0.03                    | UK Biobank                  |
| DNMT3A | 2          | 25240435 | A                 | G         | L730P       | 0.06                    | UK Biobank                  |
| DNMT3A | 2          | 25240434 | GAGCCGGCC         | G         | G728fs      | 0.16                    | UK Biobank                  |
| DNMT3A | 2          | 25240433 | A                 | G         | F731L       | 0.24                    | COPDGene                    |
| DNMT3A | 2          | 25240433 | A                 | G         | F731L       | 0.13                    | Additional TOPMED - MESA    |
| DNMT3A | 2          | 25240433 | A                 | G         | F731L       | 0.03                    | UK Biobank                  |
| DNMT3A | 2          | 25240432 | A                 | C         | F731C       | 0.03                    | UK Biobank                  |

| Gene   | Chromosome | Position | Reference | Alternate | Consequence      | Variant Allele Fraction | Cohort                      |
|--------|------------|----------|-----------|-----------|------------------|-------------------------|-----------------------------|
| DNMT3A | 2          | 25240432 | A         | C         | F731C            | 0.03                    | UK Biobank                  |
| DNMT3A | 2          | 25240432 | A         | T         | F731Y            | 0.11                    | UK Biobank                  |
| DNMT3A | 2          | 25240431 | G         | C         | F731L            | 0.17                    | UK Biobank                  |
| DNMT3A | 2          | 25240431 | G         | T         | F731L            | 0.10                    | Additional TOPMED - MESA    |
| DNMT3A | 2          | 25240430 | A         | G         | F732L            | 0.14                    | COPDGene                    |
| DNMT3A | 2          | 25240429 | A         | C         | F732C            | 0.22                    | COPDGene                    |
| DNMT3A | 2          | 25240429 | A         | C         | F732C            | 0.03                    | UK Biobank                  |
| DNMT3A | 2          | 25240429 | A         | C         | F732C            | 0.03                    | UK Biobank                  |
| DNMT3A | 2          | 25240429 | A         | G         | F732S            | 0.16                    | UK Biobank                  |
| DNMT3A | 2          | 25240429 | A         | G         | F732S            | 0.12                    | UK Biobank                  |
| DNMT3A | 2          | 25240429 | A         | G         | F732S            | 0.09                    | Additional TOPMED - FHS     |
| DNMT3A | 2          | 25240428 | AAAG      | A         | 731_732del       | 0.22                    | Additional TOPMED - FHS     |
| DNMT3A | 2          | 25240428 | AAAG      | A         | 731_732del       | 0.20                    | COPDGene                    |
| DNMT3A | 2          | 25240428 | AAAG      | A         | 732_732del       | 0.12                    | Additional TOPMED - ARIC    |
| DNMT3A | 2          | 25240428 | AAAG      | A         | F732del          | 0.14                    | UK Biobank                  |
| DNMT3A | 2          | 25240428 | AAAG      | A         | F732del          | 0.10                    | UK Biobank                  |
| DNMT3A | 2          | 25240428 | AAAG      | A         | F732del          | 0.07                    | UK Biobank                  |
| DNMT3A | 2          | 25240428 | AAAG      | A         | F732del          | 0.06                    | UK Biobank                  |
| DNMT3A | 2          | 25240428 | AAAG      | A         | F732del          | 0.06                    | UK Biobank                  |
| DNMT3A | 2          | 25240428 | AAAG      | A         | F732del          | 0.05                    | UK Biobank                  |
| DNMT3A | 2          | 25240428 | AAAG      | A         | F732del          | 0.04                    | UK Biobank                  |
| DNMT3A | 2          | 25240428 | AAAG      | A         | F732del          | 0.03                    | UK Biobank                  |
| DNMT3A | 2          | 25240427 | C         | CA        | E733_F734delinsX | 0.17                    | COPDGene                    |
| DNMT3A | 2          | 25240427 | C         | CA        | E733fs           | 0.24                    | UK Biobank                  |
| DNMT3A | 2          | 25240427 | C         | CA        | E733fs           | 0.09                    | UK Biobank                  |
| DNMT3A | 2          | 25240427 | C         | CA        | E733fs           | 0.06                    | UK Biobank                  |
| DNMT3A | 2          | 25240427 | C         | CA        | E733fs           | 0.04                    | UK Biobank                  |
| DNMT3A | 2          | 25240427 | C         | T         | E733K            | 0.04                    | UK Biobank                  |
| DNMT3A | 2          | 25240427 | C         | G         | E733Q            | 0.06                    | UK Biobank                  |
| DNMT3A | 2          | 25240427 | CAAAG     | C         | F731fs           | 0.03                    | UK Biobank                  |
| DNMT3A | 2          | 25240427 | CAAAG     | C         | F732del          | 0.03                    | UK Biobank                  |
| DNMT3A | 2          | 25240426 | T         | A         | E733V            | 0.15                    | UK Biobank                  |
| DNMT3A | 2          | 25240424 | A         | C         | F734V            | 0.27                    | COPDGene                    |
| DNMT3A | 2          | 25240422 | G         | C         | F734L            | 0.18                    | Additional TOPMED - MESA    |
| DNMT3A | 2          | 25240422 | G         | C         | F734L            | 0.10                    | Additional TOPMED - JHS     |
| DNMT3A | 2          | 25240422 | G         | C         | F734L            | 0.05                    | UK Biobank                  |
| DNMT3A | 2          | 25240421 | A         | C         | Y735D            | 0.02                    | UK Biobank                  |
| DNMT3A | 2          | 25240421 | A         | G         | Y735H            | 0.16                    | COPDGene                    |
| DNMT3A | 2          | 25240420 | T         | C         | Y735C            | 0.43                    | COPDGene                    |
| DNMT3A | 2          | 25240420 | T         | C         | Y735C            | 0.28                    | Additional TOPMED - ARIC    |
| DNMT3A | 2          | 25240420 | T         | C         | Y735C            | 0.22                    | COPDGene                    |
| DNMT3A | 2          | 25240420 | T         | C         | Y735C            | 0.20                    | UK Biobank                  |
| DNMT3A | 2          | 25240420 | T         | C         | Y735C            | 0.16                    | UK Biobank                  |
| DNMT3A | 2          | 25240420 | T         | C         | Y735C            | 0.15                    | COPDGene                    |
| DNMT3A | 2          | 25240420 | T         | C         | Y735C            | 0.15                    | Additional TOPMED - ECLIPSE |
| DNMT3A | 2          | 25240420 | T         | C         | Y735C            | 0.12                    | Additional TOPMED - ECLIPSE |
| DNMT3A | 2          | 25240420 | T         | C         | Y735C            | 0.12                    | Additional TOPMED - ECLIPSE |
| DNMT3A | 2          | 25240420 | T         | C         | Y735C            | 0.12                    | UK Biobank                  |
| DNMT3A | 2          | 25240420 | T         | C         | Y735C            | 0.11                    | Additional TOPMED - MESA    |
| DNMT3A | 2          | 25240420 | T         | C         | Y735C            | 0.11                    | Additional TOPMED - ARIC    |
| DNMT3A | 2          | 25240420 | T         | C         | Y735C            | 0.09                    | UK Biobank                  |
| DNMT3A | 2          | 25240420 | T         | C         | Y735C            | 0.08                    | UK Biobank                  |
| DNMT3A | 2          | 25240420 | T         | C         | Y735C            | 0.08                    | UK Biobank                  |
| DNMT3A | 2          | 25240420 | T         | C         | Y735C            | 0.08                    | UK Biobank                  |
| DNMT3A | 2          | 25240420 | T         | C         | Y735C            | 0.08                    | COPDGene                    |
| DNMT3A | 2          | 25240420 | T         | C         | Y735C            | 0.08                    | UK Biobank                  |
| DNMT3A | 2          | 25240420 | T         | C         | Y735C            | 0.07                    | UK Biobank                  |
| DNMT3A | 2          | 25240420 | T         | C         | Y735C            | 0.06                    | UK Biobank                  |
| DNMT3A | 2          | 25240420 | T         | C         | Y735C            | 0.06                    | UK Biobank                  |
| DNMT3A | 2          | 25240420 | T         | C         | Y735C            | 0.05                    | UK Biobank                  |
| DNMT3A | 2          | 25240420 | T         | C         | Y735C            | 0.05                    | UK Biobank                  |
| DNMT3A | 2          | 25240420 | T         | C         | Y735C            | 0.05                    | UK Biobank                  |
| DNMT3A | 2          | 25240420 | T         | C         | Y735C            | 0.05                    | UK Biobank                  |
| DNMT3A | 2          | 25240420 | T         | C         | Y735C            | 0.05                    | UK Biobank                  |
| DNMT3A | 2          | 25240420 | T         | C         | Y735C            | 0.05                    | UK Biobank                  |
| DNMT3A | 2          | 25240420 | T         | C         | Y735C            | 0.04                    | UK Biobank                  |
| DNMT3A | 2          | 25240420 | T         | C         | Y735C            | 0.04                    | UK Biobank                  |
| DNMT3A | 2          | 25240420 | T         | C         | Y735C            | 0.04                    | UK Biobank                  |
| DNMT3A | 2          | 25240420 | T         | C         | Y735C            | 0.04                    | UK Biobank                  |
| DNMT3A | 2          | 25240420 | T         | C         | Y735C            | 0.04                    | UK Biobank                  |
| DNMT3A | 2          | 25240420 | T         | C         | Y735C            | 0.03                    | UK Biobank                  |
| DNMT3A | 2          | 25240420 | T         | C         | Y735C            | 0.02                    | UK Biobank                  |
| DNMT3A | 2          | 25240420 | T         | C         | Y735C            | 0.02                    | UK Biobank                  |
| DNMT3A | 2          | 25240419 | G         | T         | Y735*            | 0.13                    | UK Biobank                  |
| DNMT3A | 2          | 25240418 | G         | A         | R736C            | 0.32                    | Additional TOPMED - MESA    |
| DNMT3A | 2          | 25240418 | G         | A         | R736C            | 0.26                    | COPDGene                    |
| DNMT3A | 2          | 25240418 | G         | A         | R736C            | 0.23                    | UK Biobank                  |
| DNMT3A | 2          | 25240418 | G         | A         | R736C            | 0.14                    | Additional TOPMED - FHS     |
| DNMT3A | 2          | 25240418 | G         | A         | R736C            | 0.13                    | COPDGene                    |
| DNMT3A | 2          | 25240418 | G         | A         | R736C            | 0.11                    | COPDGene                    |
| DNMT3A | 2          | 25240418 | G         | A         | R736C            | 0.10                    | UK Biobank                  |
| DNMT3A | 2          | 25240418 | G         | A         | R736C            | 0.10                    | Additional TOPMED - ARIC    |
| DNMT3A | 2          | 25240418 | G         | A         | R736C            | 0.09                    | UK Biobank                  |
| DNMT3A | 2          | 25240418 | G         | A         | R736C            | 0.08                    | UK Biobank                  |
| DNMT3A | 2          | 25240418 | G         | A         | R736C            | 0.06                    | UK Biobank                  |
| DNMT3A | 2          | 25240418 | G         | A         | R736C            | 0.06                    | UK Biobank                  |
| DNMT3A | 2          | 25240418 | G         | A         | R736C            | 0.05                    | UK Biobank                  |
| DNMT3A | 2          | 25240418 | G         | A         | R736C            | 0.05                    | UK Biobank                  |
| DNMT3A | 2          | 25240418 | G         | A         | R736C            | 0.05                    | UK Biobank                  |
| DNMT3A | 2          | 25240418 | G         | A         | R736C            | 0.04                    | UK Biobank                  |
| DNMT3A | 2          | 25240418 | G         | A         | R736C            | 0.04                    | UK Biobank                  |
| DNMT3A | 2          | 25240418 | G         | A         | R736C            | 0.04                    | UK Biobank                  |
| DNMT3A | 2          | 25240418 | G         | A         | R736C            | 0.04                    | UK Biobank                  |
| DNMT3A | 2          | 25240418 | G         | A         | R736C            | 0.03                    | UK Biobank                  |
| DNMT3A | 2          | 25240418 | G         | A         | R736C            | 0.03                    | UK Biobank                  |
| DNMT3A | 2          | 25240418 | G         | C         | R736G            | 0.19                    | COPDGene                    |
| DNMT3A | 2          | 25240418 | G         | C         | R736G            | 0.04                    | UK Biobank                  |
| DNMT3A | 2          | 25240417 | C         | T         | R736H            | 0.33                    | UK Biobank                  |
| DNMT3A | 2          | 25240417 | C         | T         | R736H            | 0.28                    | Additional TOPMED - JHS     |
| DNMT3A | 2          | 25240417 | C         | T         | R736H            | 0.23                    | UK Biobank                  |
| DNMT3A | 2          | 25240417 | C         | T         | R736H            | 0.14                    | COPDGene                    |
| DNMT3A | 2          | 25240417 | C         | T         | R736H            | 0.13                    | Additional TOPMED - ARIC    |
| DNMT3A | 2          | 25240417 | C         | T         | R736H            | 0.11                    | Additional TOPMED - ARIC    |
| DNMT3A | 2          | 25240417 | C         | T         | R736H            | 0.10                    | UK Biobank                  |

| Gene   | Chromosome | Position | Reference          | Alternate | Consequence | Variant Allele Fraction | Cohort                      |
|--------|------------|----------|--------------------|-----------|-------------|-------------------------|-----------------------------|
| DNMT3A | 2          | 25240417 | C                  | T         | R736H       | 0.10                    | Additional TOPMED - MESA    |
| DNMT3A | 2          | 25240417 | C                  | T         | R736H       | 0.08                    | UK Biobank                  |
| DNMT3A | 2          | 25240417 | C                  | T         | R736H       | 0.08                    | Additional TOPMED - MESA    |
| DNMT3A | 2          | 25240417 | C                  | T         | R736H       | 0.08                    | COPDGene                    |
| DNMT3A | 2          | 25240417 | C                  | T         | R736H       | 0.06                    | UK Biobank                  |
| DNMT3A | 2          | 25240417 | C                  | T         | R736H       | 0.06                    | UK Biobank                  |
| DNMT3A | 2          | 25240417 | C                  | T         | R736H       | 0.05                    | UK Biobank                  |
| DNMT3A | 2          | 25240417 | C                  | T         | R736H       | 0.04                    | UK Biobank                  |
| DNMT3A | 2          | 25240414 | A                  | C         | L737R       | 0.12                    | Additional TOPMED - ARIC    |
| DNMT3A | 2          | 25240414 | A                  | C         | L737R       | 0.06                    | UK Biobank                  |
| DNMT3A | 2          | 25240411 | AG                 | A         | L738fs      | 0.18                    | Additional TOPMED - ARIC    |
| DNMT3A | 2          | 25240411 | AG                 | A         | L738fs      | 0.07                    | UK Biobank                  |
| DNMT3A | 2          | 25240411 | A                  | G         | L738P       | 0.13                    | Additional TOPMED - FHS     |
| DNMT3A | 2          | 25240411 | A                  | G         | L738P       | 0.04                    | UK Biobank                  |
| DNMT3A | 2          | 25240411 | A                  | T         | L738Q       | 0.13                    | Additional TOPMED - MESA    |
| DNMT3A | 2          | 25240411 | A                  | T         | L738Q       | 0.03                    | UK Biobank                  |
| DNMT3A | 2          | 25240402 | G                  | T         | A741E       | 0.05                    | UK Biobank                  |
| DNMT3A | 2          | 25240402 | G                  | T         | A741E       | 0.04                    | UK Biobank                  |
| DNMT3A | 2          | 25240402 | G                  | C         | A741G       | 0.16                    | COPDGene                    |
| DNMT3A | 2          | 25240402 | G                  | C         | A741G       | 0.10                    | UK Biobank                  |
| DNMT3A | 2          | 25240402 | G                  | A         | A741V       | 0.07                    | UK Biobank                  |
| DNMT3A | 2          | 25240402 | G                  | A         | A741V       | 0.04                    | UK Biobank                  |
| DNMT3A | 2          | 25240402 | G                  | A         | A741V       | 0.03                    | UK Biobank                  |
| DNMT3A | 2          | 25240399 | C                  | CG        | R742fs      | 0.10                    | UK Biobank                  |
| DNMT3A | 2          | 25240399 | C                  | G         | R742P       | 0.12                    | UK Biobank                  |
| DNMT3A | 2          | 25240397 | G                  | C         | P743A       | 0.09                    | UK Biobank                  |
| DNMT3A | 2          | 25240396 | G                  | A         | P743L       | 0.14                    | Additional TOPMED - MESA    |
| DNMT3A | 2          | 25240396 | G                  | A         | P743L       | 0.14                    | COPDGene                    |
| DNMT3A | 2          | 25240391 | C                  | A         | E745*       | 0.07                    | UK Biobank                  |
| DNMT3A | 2          | 25240379 | G                  | A         | R749C       | 0.35                    | COPDGene                    |
| DNMT3A | 2          | 25240379 | G                  | A         | R749C       | 0.20                    | COPDGene                    |
| DNMT3A | 2          | 25240379 | G                  | A         | R749C       | 0.17                    | UK Biobank                  |
| DNMT3A | 2          | 25240379 | G                  | A         | R749C       | 0.16                    | UK Biobank                  |
| DNMT3A | 2          | 25240379 | G                  | A         | R749C       | 0.15                    | COPDGene                    |
| DNMT3A | 2          | 25240379 | G                  | A         | R749C       | 0.14                    | UK Biobank                  |
| DNMT3A | 2          | 25240379 | G                  | A         | R749C       | 0.12                    | Additional TOPMED - JHS     |
| DNMT3A | 2          | 25240379 | G                  | A         | R749C       | 0.11                    | Additional TOPMED - MESA    |
| DNMT3A | 2          | 25240379 | G                  | A         | R749C       | 0.07                    | Additional TOPMED - ARIC    |
| DNMT3A | 2          | 25240379 | G                  | A         | R749C       | 0.06                    | UK Biobank                  |
| DNMT3A | 2          | 25240379 | G                  | A         | R749C       | 0.04                    | UK Biobank                  |
| DNMT3A | 2          | 25240379 | G                  | A         | R749C       | 0.03                    | UK Biobank                  |
| DNMT3A | 2          | 25240379 | G                  | C         | R749G       | 0.17                    | Additional TOPMED - ARIC    |
| DNMT3A | 2          | 25240379 | G                  | C         | R749G       | 0.04                    | UK Biobank                  |
| DNMT3A | 2          | 25240378 | C                  | T         | R749H       | 0.33                    | Additional TOPMED - ARIC    |
| DNMT3A | 2          | 25240378 | C                  | T         | R749H       | 0.14                    | Additional TOPMED - CFS     |
| DNMT3A | 2          | 25240378 | C                  | T         | R749H       | 0.10                    | UK Biobank                  |
| DNMT3A | 2          | 25240378 | C                  | T         | R749H       | 0.08                    | UK Biobank                  |
| DNMT3A | 2          | 25240378 | C                  | T         | R749H       | 0.06                    | UK Biobank                  |
| DNMT3A | 2          | 25240378 | C                  | T         | R749H       | 0.04                    | UK Biobank                  |
| DNMT3A | 2          | 25240378 | C                  | T         | R749H       | 0.04                    | UK Biobank                  |
| DNMT3A | 2          | 25240378 | C                  | A         | R749L       | 0.17                    | Additional TOPMED - MESA    |
| DNMT3A | 2          | 25240378 | C                  | G         | R749P       | 0.11                    | UK Biobank                  |
| DNMT3A | 2          | 25240376 | G                  | A         | P750S       | 0.07                    | UK Biobank                  |
| DNMT3A | 2          | 25240373 | AG                 | A         | F751fs      | 0.12                    | UK Biobank                  |
| DNMT3A | 2          | 25240373 | A                  | AG        | F751fs      | 0.04                    | UK Biobank                  |
| DNMT3A | 2          | 25240373 | A                  | C         | F751V       | 0.26                    | UK Biobank                  |
| DNMT3A | 2          | 25240373 | A                  | C         | F751V       | 0.10                    | COPDGene                    |
| DNMT3A | 2          | 25240371 | G                  | C         | F751L       | 0.11                    | UK Biobank                  |
| DNMT3A | 2          | 25240370 | AG                 | A         | F752fs      | 0.12                    | UK Biobank                  |
| DNMT3A | 2          | 25240370 | A                  | T         | F752L       | 0.10                    | COPDGene                    |
| DNMT3A | 2          | 25240370 | A                  | G         | F752L       | 0.27                    | COPDGene                    |
| DNMT3A | 2          | 25240369 | AAG                | A         | F752fs      | 0.34                    | UK Biobank                  |
| DNMT3A | 2          | 25240369 | A                  | G         | F752S       | 0.06                    | UK Biobank                  |
| DNMT3A | 2          | 25240368 | GA                 | G         | F752fs      | 0.02                    | UK Biobank                  |
| DNMT3A | 2          | 25240368 | G                  | C         | F752L       | 0.34                    | Additional TOPMED - JHS     |
| DNMT3A | 2          | 25240368 | G                  | C         | F752L       | 0.08                    | UK Biobank                  |
| DNMT3A | 2          | 25240367 | A                  | G         | W753R       | 0.22                    | UK Biobank                  |
| DNMT3A | 2          | 25240367 | A                  | T         | W753R       | 0.04                    | UK Biobank                  |
| DNMT3A | 2          | 25240366 | CAGA               | C         | F752del     | 0.21                    | UK Biobank                  |
| DNMT3A | 2          | 25240366 | CAGA               | C         | F752del     | 0.11                    | UK Biobank                  |
| DNMT3A | 2          | 25240366 | C                  | A         | W753L       | 0.29                    | Additional TOPMED - MESA    |
| DNMT3A | 2          | 25240366 | C                  | A         | W753L       | 0.12                    | COPDGene                    |
| DNMT3A | 2          | 25240363 | A                  | T         | L754H       | 0.13                    | UK Biobank                  |
| DNMT3A | 2          | 25240363 | A                  | C         | L754R       | 0.11                    | Additional TOPMED - ARIC    |
| DNMT3A | 2          | 25240361 | A                  | C         | F755V       | 0.05                    | UK Biobank                  |
| DNMT3A | 2          | 25240361 | AGAGCCAGAAGAAGGGCC | A         | R749fs      | 0.08                    | COPDGene                    |
| DNMT3A | 2          | 25240360 | A                  | G         | F755S       | 0.29                    | Additional TOPMED - ECLIPSE |
| DNMT3A | 2          | 25240360 | A                  | G         | F755S       | 0.16                    | Additional TOPMED - MESA    |
| DNMT3A | 2          | 25240360 | A                  | G         | F755S       | 0.15                    | Additional TOPMED - MESA    |
| DNMT3A | 2          | 25240360 | A                  | G         | F755S       | 0.11                    | Additional TOPMED - MESA    |
| DNMT3A | 2          | 25240360 | A                  | G         | F755S       | 0.10                    | Additional TOPMED - MESA    |
| DNMT3A | 2          | 25240360 | A                  | G         | F755S       | 0.08                    | UK Biobank                  |
| DNMT3A | 2          | 25240360 | A                  | G         | F755S       | 0.08                    | UK Biobank                  |
| DNMT3A | 2          | 25240360 | A                  | G         | F755S       | 0.05                    | UK Biobank                  |
| DNMT3A | 2          | 25240360 | A                  | G         | F755S       | 0.04                    | UK Biobank                  |
| DNMT3A | 2          | 25240360 | A                  | G         | F755S       | 0.04                    | UK Biobank                  |
| DNMT3A | 2          | 25240360 | A                  | G         | F755S       | 0.04                    | UK Biobank                  |
| DNMT3A | 2          | 25240360 | A                  | G         | F755S       | 0.02                    | UK Biobank                  |
| DNMT3A | 2          | 25240358 | CAA                | C         | F755fs      | 0.25                    | Additional TOPMED - CFS     |
| DNMT3A | 2          | 25240358 | CA                 | C         | F755fs      | 0.04                    | UK Biobank                  |
| DNMT3A | 2          | 25240349 | CCA                | C         | V758fs      | 0.04                    | UK Biobank                  |
| DNMT3A | 2          | 25240343 | T                  | C         | M761V       | 0.12                    | Additional TOPMED - MESA    |
| DNMT3A | 2          | 25240343 | T                  | C         | M761V       | 0.12                    | COPDGene                    |
| DNMT3A | 2          | 25240341 | CAT                | C         | M761fs      | 0.30                    | Additional TOPMED - JHS     |
| DNMT3A | 2          | 25240326 | CTT                | C         | K766fs      | 0.12                    | COPDGene                    |
| DNMT3A | 2          | 25240325 | T                  | C         | R767G       | 0.34                    | UK Biobank                  |
| DNMT3A | 2          | 25240324 | CT                 | C         | R767fs      | 0.06                    | UK Biobank                  |
| DNMT3A | 2          | 25240324 | CT                 | C         | R767fs      | 0.06                    | UK Biobank                  |
| DNMT3A | 2          | 25240322 | C                  | T         | D768N       | 0.09                    | UK Biobank                  |

| Gene   | Chromosome | Position | Reference                | Alternate | Consequence                 | Variant Allele Fraction | Cohort                      |
|--------|------------|----------|--------------------------|-----------|-----------------------------|-------------------------|-----------------------------|
| DNMT3A | 2          | 25240320 | G                        | T         | D768E                       | 0.17                    | Additional TOPMED - ARIC    |
| DNMT3A | 2          | 25240319 | T                        | C         | I769V                       | 0.06                    | UK Biobank                  |
| DNMT3A | 2          | 25240319 | T                        | C         | I769V                       | 0.03                    | UK Biobank                  |
| DNMT3A | 2          | 25240315 | G                        | A         | S770L                       | 0.32                    | UK Biobank                  |
| DNMT3A | 2          | 25240315 | G                        | A         | S770L                       | 0.23                    | COPDGene                    |
| DNMT3A | 2          | 25240315 | G                        | A         | S770L                       | 0.23                    | COPDGene                    |
| DNMT3A | 2          | 25240315 | G                        | A         | S770L                       | 0.22                    | Additional TOPMED - JHS     |
| DNMT3A | 2          | 25240315 | G                        | A         | S770L                       | 0.19                    | UK Biobank                  |
| DNMT3A | 2          | 25240315 | G                        | A         | S770L                       | 0.18                    | UK Biobank                  |
| DNMT3A | 2          | 25240315 | G                        | A         | S770L                       | 0.12                    | Additional TOPMED - ECLIPSE |
| DNMT3A | 2          | 25240315 | G                        | A         | S770L                       | 0.06                    | COPDGene                    |
| DNMT3A | 2          | 25240315 | G                        | A         | S770L                       | 0.06                    | UK Biobank                  |
| DNMT3A | 2          | 25240315 | G                        | A         | S770L                       | 0.04                    | UK Biobank                  |
| DNMT3A | 2          | 25240315 | G                        | C         | S770W                       | 0.04                    | UK Biobank                  |
| DNMT3A | 2          | 25240313 | G                        | GCGA      | 770_771insS                 | 0.06                    | UK Biobank                  |
| DNMT3A | 2          | 25240313 | G                        | A         | R771*                       | 0.24                    | UK Biobank                  |
| DNMT3A | 2          | 25240313 | G                        | A         | R771*                       | 0.22                    | UK Biobank                  |
| DNMT3A | 2          | 25240313 | G                        | A         | R771*                       | 0.18                    | UK Biobank                  |
| DNMT3A | 2          | 25240313 | G                        | A         | R771*                       | 0.18                    | UK Biobank                  |
| DNMT3A | 2          | 25240313 | G                        | A         | R771*                       | 0.14                    | UK Biobank                  |
| DNMT3A | 2          | 25240313 | G                        | A         | R771*                       | 0.13                    | UK Biobank                  |
| DNMT3A | 2          | 25240313 | G                        | A         | R771*                       | 0.12                    | UK Biobank                  |
| DNMT3A | 2          | 25240313 | G                        | A         | R771*                       | 0.12                    | UK Biobank                  |
| DNMT3A | 2          | 25240313 | G                        | A         | R771*                       | 0.12                    | UK Biobank                  |
| DNMT3A | 2          | 25240313 | G                        | A         | R771*                       | 0.07                    | UK Biobank                  |
| DNMT3A | 2          | 25240313 | G                        | A         | R771*                       | 0.05                    | UK Biobank                  |
| DNMT3A | 2          | 25240313 | G                        | A         | R771*                       | 0.05                    | UK Biobank                  |
| DNMT3A | 2          | 25240313 | G                        | A         | R771*                       | 0.04                    | UK Biobank                  |
| DNMT3A | 2          | 25240313 | G                        | A         | R771*                       | 0.03                    | UK Biobank                  |
| DNMT3A | 2          | 25240313 | G                        | A         | R771*                       | 0.03                    | UK Biobank                  |
| DNMT3A | 2          | 25240313 | G                        | C         | R771G                       | 0.14                    | COPDGene                    |
| DNMT3A | 2          | 25240313 | G                        | C         | R771G                       | 0.04                    | UK Biobank                  |
| DNMT3A | 2          | 25240313 | G                        | A         | R771X                       | 0.38                    | Additional TOPMED - ECLIPSE |
| DNMT3A | 2          | 25240313 | G                        | A         | R771X                       | 0.27                    | COPDGene                    |
| DNMT3A | 2          | 25240313 | G                        | A         | R771X                       | 0.21                    | COPDGene                    |
| DNMT3A | 2          | 25240313 | G                        | A         | R771X                       | 0.17                    | Additional TOPMED - JHS     |
| DNMT3A | 2          | 25240313 | G                        | A         | R771X                       | 0.13                    | COPDGene                    |
| DNMT3A | 2          | 25240313 | G                        | A         | R771X                       | 0.13                    | COPDGene                    |
| DNMT3A | 2          | 25240313 | G                        | A         | R771X                       | 0.12                    | COPDGene                    |
| DNMT3A | 2          | 25240313 | G                        | A         | R771X                       | 0.11                    | COPDGene                    |
| DNMT3A | 2          | 25240313 | G                        | A         | R771X                       | 0.10                    | Additional TOPMED - ECLIPSE |
| DNMT3A | 2          | 25240312 | C                        | A         | R771L                       | 0.22                    | COPDGene                    |
| DNMT3A | 2          | 25240312 | C                        | A         | R771L                       | 0.15                    | Additional TOPMED - MESA    |
| DNMT3A | 2          | 25240312 | C                        | A         | R771L                       | 0.11                    | UK Biobank                  |
| DNMT3A | 2          | 25240312 | C                        | A         | R771L                       | 0.04                    | UK Biobank                  |
| DNMT3A | 2          | 25240312 | C                        | A         | R771L                       | 0.03                    | UK Biobank                  |
| DNMT3A | 2          | 25240312 | C                        | G         | R771P                       | 0.08                    | UK Biobank                  |
| DNMT3A | 2          | 25240312 | C                        | T         | R771Q                       | 0.24                    | UK Biobank                  |
| DNMT3A | 2          | 25240312 | C                        | T         | R771Q                       | 0.23                    | Additional TOPMED - ECLIPSE |
| DNMT3A | 2          | 25240312 | C                        | T         | R771Q                       | 0.10                    | Additional TOPMED - ARIC    |
| DNMT3A | 2          | 25240312 | C                        | T         | R771Q                       | 0.06                    | UK Biobank                  |
| DNMT3A | 2          | 25240312 | C                        | T         | R771Q                       | 0.05                    | UK Biobank                  |
| DNMT3A | 2          | 25240312 | C                        | T         | R771Q                       | 0.05                    | UK Biobank                  |
| DNMT3A | 2          | 25240312 | C                        | T         | R771Q                       | 0.04                    | UK Biobank                  |
| DNMT3A | 2          | 25240312 | C                        | T         | R771Q                       | 0.04                    | UK Biobank                  |
| DNMT3A | 2          | 25240312 | CGCGAGATGTCCCTCTTGCTACTA | T         | S764fs                      | 0.02                    | UK Biobank                  |
| DNMT3A | 2          | 25240307 | G                        | C         | L773V                       | 0.03                    | UK Biobank                  |
| DNMT3A | 2          | 25240304 | C                        | A         | E774*                       | 0.34                    | UK Biobank                  |
| DNMT3A | 2          | 25240304 | C                        | A         | E774*                       | 0.20                    | UK Biobank                  |
| DNMT3A | 2          | 25240304 | C                        | A         | E774*                       | 0.16                    | UK Biobank                  |
| DNMT3A | 2          | 25240304 | C                        | A         | E774*                       | 0.06                    | UK Biobank                  |
| DNMT3A | 2          | 25240303 | T                        | A         | E774V                       | 0.11                    | COPDGene                    |
| DNMT3A | 2          | 25240302 | G                        | G         | E774D                       | 0.05                    | UK Biobank                  |
| DNMT3A | 2          | 25240301 | C                        | A         | c.1755+1G>T                 | 0.22                    | Additional TOPMED - CFS     |
| DNMT3A | 2          | 25240301 | C                        | T         | c.e19-1G>A                  | 0.09                    | UK Biobank                  |
| DNMT3A | 2          | 25240300 | ACCTCGAGAAATCGCGAGAT     | A         | c.e19-2ATCTCGCGATTTCGAGGT>T | 0.05                    | UK Biobank                  |
| DNMT3A | 2          | 25240300 | AC                       | A         | c.e19-2GT>T                 | 0.06                    | UK Biobank                  |
| DNMT3A | 2          | 25240300 | A                        | G         | c.e19-2T>C                  | 0.05                    | UK Biobank                  |
| DNMT3A | 2          | 25240300 | A                        | G         | c.e19-2T>C                  | 0.04                    | UK Biobank                  |
| DNMT3A | 2          | 25239217 | T                        | G         | c.1756-2A>C                 | 0.17                    | Additional TOPMED - ARIC    |
| DNMT3A | 2          | 25239217 | T                        | C         | c.e20+2A>G                  | 0.21                    | UK Biobank                  |
| DNMT3A | 2          | 25239217 | T                        | C         | c.e20+2A>G                  | 0.10                    | UK Biobank                  |
| DNMT3A | 2          | 25239217 | T                        | C         | c.e20+2A>G                  | 0.09                    | UK Biobank                  |
| DNMT3A | 2          | 25239216 | C                        | T         | c.2323-1G>A                 | 0.50                    | COPDGene                    |
| DNMT3A | 2          | 25239216 | C                        | T         | c.2323-1G>A                 | 0.15                    | Additional TOPMED - ARIC    |
| DNMT3A | 2          | 25239216 | C                        | T         | c.e20+1G>A                  | 0.10                    | UK Biobank                  |
| DNMT3A | 2          | 25239209 | G                        | A         | P777S                       | 0.25                    | Additional TOPMED - MESA    |
| DNMT3A | 2          | 25239209 | G                        | A         | P777S                       | 0.22                    | Additional TOPMED - CFS     |
| DNMT3A | 2          | 25239209 | G                        | A         | P777S                       | 0.18                    | Additional TOPMED - ECLIPSE |
| DNMT3A | 2          | 25239209 | G                        | A         | P777S                       | 0.18                    | Additional TOPMED - FHS     |
| DNMT3A | 2          | 25239208 | G                        | C         | P777R                       | 0.13                    | COPDGene                    |
| DNMT3A | 2          | 25239199 | A                        | C         | I780S                       | 0.30                    | Additional TOPMED - JHS     |
| DNMT3A | 2          | 25239199 | A                        | C         | I780S                       | 0.11                    | UK Biobank                  |
| DNMT3A | 2          | 25239199 | A                        | G         | I780T                       | 0.34                    | Additional TOPMED - ECLIPSE |
| DNMT3A | 2          | 25239199 | A                        | G         | I780T                       | 0.19                    | Additional TOPMED - MESA    |
| DNMT3A | 2          | 25239199 | A                        | G         | I780T                       | 0.14                    | UK Biobank                  |
| DNMT3A | 2          | 25239199 | A                        | G         | I780T                       | 0.13                    | Additional TOPMED - JHS     |
| DNMT3A | 2          | 25239199 | A                        | G         | I780T                       | 0.12                    | COPDGene                    |
| DNMT3A | 2          | 25239199 | A                        | G         | I780T                       | 0.12                    | Additional TOPMED - JHS     |
| DNMT3A | 2          | 25239199 | A                        | G         | I780T                       | 0.10                    | Additional TOPMED - ECLIPSE |
| DNMT3A | 2          | 25239193 | G                        | A         | A782V                       | 0.05                    | UK Biobank                  |
| DNMT3A | 2          | 25239181 | GAC                      | G         | V785fs                      | 0.10                    | Additional TOPMED - FHS     |
| DNMT3A | 2          | 25239179 | CT                       | C         | S786fs                      | 0.10                    | COPDGene                    |
| DNMT3A | 2          | 25239173 | GTGCAGC                  | G         | AA787del                    | 0.35                    | UK Biobank                  |
| DNMT3A | 2          | 25239171 | G                        | C         | H789Q                       | 0.15                    | COPDGene                    |
| DNMT3A | 2          | 25239163 | CG                       | C         | R792fs                      | 0.04                    | UK Biobank                  |
| DNMT3A | 2          | 25239163 | C                        | T         | R792H                       | 0.42                    | COPDGene                    |
| DNMT3A | 2          | 25239159 | G                        | T         | Y793*                       | 0.06                    | UK Biobank                  |

| Gene   | Chromosome | Position | Reference                 | Alternate | Consequence  | Variant Allele Fraction | Cohort                      |
|--------|------------|----------|---------------------------|-----------|--------------|-------------------------|-----------------------------|
| DNMT3A | 2          | 25239159 | G                         | C         | Y793X        | 0.31                    | COPDGene                    |
| DNMT3A | 2          | 25239158 | A                         | G         | F794L        | 0.50                    | COPDGene                    |
| DNMT3A | 2          | 25239158 | A                         | G         | F794L        | 0.14                    | Additional TOPMED - ECLIPSE |
| DNMT3A | 2          | 25239157 | A                         | ATACAC    | F794fs       | 0.17                    | Additional TOPMED - MESA    |
| DNMT3A | 2          | 25239155 | AG                        | A         | F794fs       | 0.11                    | Additional TOPMED - MESA    |
| DNMT3A | 2          | 25239155 | A                         | T         | W795R        | 0.17                    | COPDGene                    |
| DNMT3A | 2          | 25239154 | C                         | T         | W795*        | 0.09                    | UK Biobank                  |
| DNMT3A | 2          | 25239154 | C                         | A         | W795L        | 0.27                    | Additional TOPMED - MESA    |
| DNMT3A | 2          | 25239154 | C                         | A         | W795L        | 0.03                    | UK Biobank                  |
| DNMT3A | 2          | 25239154 | C                         | T         | W795X        | 0.14                    | COPDGene                    |
| DNMT3A | 2          | 25239154 | C                         | T         | W795X        | 0.14                    | COPDGene                    |
| DNMT3A | 2          | 25239154 | C                         | T         | W795X        | 0.13                    | Additional TOPMED - FHS     |
| DNMT3A | 2          | 25239153 | C                         | G         | W795C        | 0.05                    | UK Biobank                  |
| DNMT3A | 2          | 25239152 | C                         | A         | G796C        | 0.20                    | UK Biobank                  |
| DNMT3A | 2          | 25239151 | C                         | T         | G796D        | 0.14                    | UK Biobank                  |
| DNMT3A | 2          | 25239151 | C                         | T         | G796D        | 0.08                    | UK Biobank                  |
| DNMT3A | 2          | 25239148 | T                         | C         | N797S        | 0.17                    | UK Biobank                  |
| DNMT3A | 2          | 25239146 | G                         | GGTAA     | L798fs       | 0.11                    | COPDGene                    |
| DNMT3A | 2          | 25239145 | A                         | C         | L798R        | 0.14                    | COPDGene                    |
| DNMT3A | 2          | 25239145 | A                         | C         | L798R        | 0.06                    | UK Biobank                  |
| DNMT3A | 2          | 25239143 | G                         | C         | P799A        | 0.15                    | COPDGene                    |
| DNMT3A | 2          | 25239143 | G                         | A         | P799S        | 0.15                    | COPDGene                    |
| DNMT3A | 2          | 25239143 | G                         | A         | P799S        | 0.11                    | COPDGene                    |
| DNMT3A | 2          | 25239143 | G                         | A         | P799S        | 0.09                    | Additional TOPMED - ARIC    |
| DNMT3A | 2          | 25239143 | G                         | T         | P799T        | 0.11                    | Additional TOPMED - MESA    |
| DNMT3A | 2          | 25239140 | CG                        | C         | P799fs       | 0.59                    | Additional TOPMED - FHS     |
| DNMT3A | 2          | 25239140 | CG                        | C         | P799fs       | 0.13                    | Additional TOPMED - JHS     |
| DNMT3A | 2          | 25239137 | T                         | C         | M801V        | 0.22                    | Additional TOPMED - JHS     |
| DNMT3A | 2          | 25239137 | T                         | C         | M801V        | 0.13                    | UK Biobank                  |
| DNMT3A | 2          | 25239136 | A                         | C         | M801R        | 0.24                    | Additional TOPMED - FHS     |
| DNMT3A | 2          | 25239135 | C                         | T         | M801I        | 0.17                    | COPDGene                    |
| DNMT3A | 2          | 25239132 | GT                        | G         | N802fs       | 0.21                    | Additional TOPMED - JHS     |
| DNMT3A | 2          | 25239131 | T                         | C         | R803G        | 0.09                    | UK Biobank                  |
| DNMT3A | 2          | 25239131 | T                         | C         | R803G        | 0.07                    | UK Biobank                  |
| DNMT3A | 2          | 25239130 | C                         | T         | R803K        | 0.28                    | Additional TOPMED - ARIC    |
| DNMT3A | 2          | 25239130 | C                         | T         | R803K        | 0.13                    | UK Biobank                  |
| DNMT3A | 2          | 25239130 | C                         | T         | R803K        | 0.13                    | UK Biobank                  |
| DNMT3A | 2          | 25239130 | C                         | T         | R803K        | 0.10                    | UK Biobank                  |
| DNMT3A | 2          | 25239129 | C                         | T         | c.2408+1G>A  | 0.23                    | Additional TOPMED - JHS     |
| DNMT3A | 2          | 25239129 | C                         | T         | c.2408+1G>A  | 0.08                    | COPDGene                    |
| DNMT3A | 2          | 25239128 | A                         | G         | c.2408+2T>C  | 0.11                    | COPDGene                    |
| DNMT3A | 2          | 25239128 | A                         | T         | c.e20-2T>A   | 0.07                    | UK Biobank                  |
| DNMT3A | 2          | 25237007 | T                         | G         | c.2409-2A>C  | 0.22                    | COPDGene                    |
| DNMT3A | 2          | 25237007 | T                         | C         | c.e21+2A>G   | 0.08                    | UK Biobank                  |
| DNMT3A | 2          | 25237006 | C                         | G         | c.e21+1G>C   | 0.09                    | UK Biobank                  |
| DNMT3A | 2          | 25237005 | C                         | A         | R803S        | 0.26                    | Additional TOPMED - MESA    |
| DNMT3A | 2          | 25237003 | G                         | A         | P804L        | 0.14                    | UK Biobank                  |
| DNMT3A | 2          | 25236999 | CA                        | C         | L805fs       | 0.16                    | Additional TOPMED - ARIC    |
| DNMT3A | 2          | 25236997 | GC                        | G         | A806fs       | 0.06                    | UK Biobank                  |
| DNMT3A | 2          | 25236994 | GATGCC                    | G         | L805fs       | 0.12                    | Additional TOPMED - ECLIPSE |
| DNMT3A | 2          | 25236994 | G                         | GATGCC    | S807fs       | 0.10                    | COPDGene                    |
| DNMT3A | 2          | 25236983 | CA                        | C         | N810fs       | 0.10                    | UK Biobank                  |
| DNMT3A | 2          | 25236969 | CAGCTCCAGCTTATCATTACAGTGA | C         | S807fs       | 0.10                    | Additional TOPMED - MESA    |
| DNMT3A | 2          | 25236968 | G                         | A         | Q816X        | 0.33                    | COPDGene                    |
| DNMT3A | 2          | 25236955 | T                         | C         | E820G        | 0.08                    | UK Biobank                  |
| DNMT3A | 2          | 25236951 | AT                        | A         | H821fs       | 0.12                    | COPDGene                    |
| DNMT3A | 2          | 25236944 | T                         | TC        | I824fs       | 0.14                    | Additional TOPMED - ARIC    |
| DNMT3A | 2          | 25236937 | T                         | C         | K826R        | 0.26                    | Additional TOPMED - ARIC    |
| DNMT3A | 2          | 25236937 | T                         | C         | K826R        | 0.12                    | Additional TOPMED - MESA    |
| DNMT3A | 2          | 25236937 | T                         | C         | K826R        | 0.06                    | UK Biobank                  |
| DNMT3A | 2          | 25236936 | C                         | T         | K826K        | 0.21                    | UK Biobank                  |
| DNMT3A | 2          | 25236936 | C                         | G         | K826N        | 0.09                    | Additional TOPMED - FHS     |
| DNMT3A | 2          | 25236935 | CCT                       | T         | c.2478+1G>A  | 0.30                    | Additional TOPMED - FHS     |
| DNMT3A | 2          | 25236935 | CCT                       | C         | c.e21-1AGG>G | 0.06                    | UK Biobank                  |
| DNMT3A | 2          | 25236935 | C                         | T         | c.e21-1G>A   | 0.18                    | UK Biobank                  |
| DNMT3A | 2          | 25236935 | C                         | T         | c.e21-1G>A   | 0.09                    | UK Biobank                  |
| DNMT3A | 2          | 25236934 | A                         | G         | c.e21-2T>C   | 0.06                    | UK Biobank                  |
| DNMT3A | 2          | 25236934 | A                         | C         | c.e21-2T>G   | 0.13                    | UK Biobank                  |
| DNMT3A | 2          | 25235827 | T                         | C         | c.e22+2A>G   | 0.20                    | UK Biobank                  |
| DNMT3A | 2          | 25235803 | G                         | GT        | T834fs       | 0.39                    | UK Biobank                  |
| DNMT3A | 2          | 25235801 | TA                        | T         | T834fs       | 0.36                    | Additional TOPMED - ARIC    |
| DNMT3A | 2          | 25235800 | G                         | A         | T835M        | 0.20                    | Additional TOPMED - MESA    |
| DNMT3A | 2          | 25235792 | T                         | C         | N838D        | 0.16                    | Additional TOPMED - ARIC    |
| DNMT3A | 2          | 25235792 | T                         | C         | N838D        | 0.16                    | COPDGene                    |
| DNMT3A | 2          | 25235792 | T                         | C         | N838D        | 0.14                    | Additional TOPMED - MESA    |
| DNMT3A | 2          | 25235792 | T                         | C         | N838D        | 0.09                    | COPDGene                    |
| DNMT3A | 2          | 25235792 | T                         | C         | N838D        | 0.08                    | UK Biobank                  |
| DNMT3A | 2          | 25235768 | G                         | A         | Q846*        | 0.28                    | UK Biobank                  |
| DNMT3A | 2          | 25235768 | G                         | A         | Q846X        | 0.11                    | COPDGene                    |
| DNMT3A | 2          | 25235758 | G                         | C         | P849R        | 0.07                    | UK Biobank                  |
| DNMT3A | 2          | 25235750 | T                         | G         | M852L        | 0.12                    | UK Biobank                  |
| DNMT3A | 2          | 25235750 | T                         | C         | M852V        | 0.26                    | UK Biobank                  |
| DNMT3A | 2          | 25235735 | CCT                       | C         | E856fs       | 0.16                    | Additional TOPMED - FHS     |
| DNMT3A | 2          | 25235727 | TAA                       | T         | L859fs       | 0.19                    | Additional TOPMED - JHS     |
| DNMT3A | 2          | 25235726 | A                         | AT        | W860fs       | 0.19                    | Additional TOPMED - ARIC    |
| DNMT3A | 2          | 25235726 | A                         | G         | W860R        | 0.35                    | UK Biobank                  |
| DNMT3A | 2          | 25235726 | A                         | G         | W860R        | 0.10                    | UK Biobank                  |
| DNMT3A | 2          | 25235726 | A                         | G         | W860R        | 0.10                    | COPDGene                    |
| DNMT3A | 2          | 25235726 | A                         | G         | W860R        | 0.08                    | UK Biobank                  |
| DNMT3A | 2          | 25235725 | C                         | T         | W860*        | 0.19                    | UK Biobank                  |
| DNMT3A | 2          | 25235725 | C                         | T         | W860*        | 0.11                    | UK Biobank                  |
| DNMT3A | 2          | 25235725 | C                         | T         | W860X        | 0.09                    | COPDGene                    |
| DNMT3A | 2          | 25235724 | C                         | T         | W860X        | 0.32                    | Additional TOPMED - MESA    |
| DNMT3A | 2          | 25235724 | C                         | T         | W860X        | 0.29                    | Additional TOPMED - FHS     |
| DNMT3A | 2          | 25235724 | C                         | T         | W860X        | 0.16                    | Additional TOPMED - MESA    |
| DNMT3A | 2          | 25235723 | A                         | G         | C861R        | 0.35                    | UK Biobank                  |
| DNMT3A | 2          | 25235716 | T                         | A         | E863V        | 0.12                    | UK Biobank                  |
| DNMT3A | 2          | 25235706 | C                         | T         | c.2030+1G>A  | 0.12                    | Additional TOPMED - MESA    |
| DNMT3A | 2          | 25235706 | C                         | A         | c.2597+1G>T  | 0.21                    | COPDGene                    |

| Gene   | Chromosome | Position | Reference | Alternate | Consequence | Variant Allele Fraction | Cohort                      |
|--------|------------|----------|-----------|-----------|-------------|-------------------------|-----------------------------|
| DNMT3A | 2          | 25235705 | A         | C         | c.e22-2T>G  | 0.13                    | UK Biobank                  |
| DNMT3A | 2          | 25234421 | C         | T         | c.2598-1G>A | 0.24                    | Additional TOPMED - ARIC    |
| DNMT3A | 2          | 25234418 | AC        | A         | V867fs      | 0.43                    | COPDGene                    |
| DNMT3A | 2          | 25234414 | A         | C         | F868L       | 0.33                    | COPDGene                    |
| DNMT3A | 2          | 25234413 | C         | CAAAT     | G869fs      | 0.13                    | Additional TOPMED - FHS     |
| DNMT3A | 2          | 25234412 | C         | A         | G869V       | 0.14                    | COPDGene                    |
| DNMT3A | 2          | 25234411 | AC        | A         | G869fs      | 0.23                    | UK Biobank                  |
| DNMT3A | 2          | 25234401 | G         | C         | H873D       | 0.06                    | UK Biobank                  |
| DNMT3A | 2          | 25234392 | C         | T         | D876N       | 0.29                    | UK Biobank                  |
| DNMT3A | 2          | 25234392 | C         | T         | D876N       | 0.11                    | UK Biobank                  |
| DNMT3A | 2          | 25234391 | T         | G         | D876A       | 0.03                    | UK Biobank                  |
| DNMT3A | 2          | 25234390 | G         | GT        | D876fs      | 0.33                    | UK Biobank                  |
| DNMT3A | 2          | 25234383 | T         | C         | N879D       | 0.11                    | UK Biobank                  |
| DNMT3A | 2          | 25234383 | T         | C         | N879D       | 0.10                    | UK Biobank                  |
| DNMT3A | 2          | 25234380 | T         | C         | M880V       | 0.12                    | Additional TOPMED - FHS     |
| DNMT3A | 2          | 25234380 | T         | C         | M880V       | 0.12                    | Additional TOPMED - FHS     |
| DNMT3A | 2          | 25234380 | T         | C         | M880V       | 0.09                    | COPDGene                    |
| DNMT3A | 2          | 25234374 | G         | A         | R882C       | 0.42                    | COPDGene                    |
| DNMT3A | 2          | 25234374 | G         | A         | R882C       | 0.31                    | Additional TOPMED - ARIC    |
| DNMT3A | 2          | 25234374 | G         | A         | R882C       | 0.30                    | COPDGene                    |
| DNMT3A | 2          | 25234374 | G         | A         | R882C       | 0.30                    | Additional TOPMED - ARIC    |
| DNMT3A | 2          | 25234374 | G         | A         | R882C       | 0.29                    | UK Biobank                  |
| DNMT3A | 2          | 25234374 | G         | A         | R882C       | 0.24                    | Additional TOPMED - MESA    |
| DNMT3A | 2          | 25234374 | G         | A         | R882C       | 0.23                    | UK Biobank                  |
| DNMT3A | 2          | 25234374 | G         | A         | R882C       | 0.23                    | Additional TOPMED - ARIC    |
| DNMT3A | 2          | 25234374 | G         | A         | R882C       | 0.21                    | COPDGene                    |
| DNMT3A | 2          | 25234374 | G         | A         | R882C       | 0.21                    | UK Biobank                  |
| DNMT3A | 2          | 25234374 | G         | A         | R882C       | 0.20                    | UK Biobank                  |
| DNMT3A | 2          | 25234374 | G         | A         | R882C       | 0.20                    | UK Biobank                  |
| DNMT3A | 2          | 25234374 | G         | A         | R882C       | 0.20                    | Additional TOPMED - ECLIPSE |
| DNMT3A | 2          | 25234374 | G         | A         | R882C       | 0.20                    | UK Biobank                  |
| DNMT3A | 2          | 25234374 | G         | A         | R882C       | 0.19                    | COPDGene                    |
| DNMT3A | 2          | 25234374 | G         | A         | R882C       | 0.19                    | COPDGene                    |
| DNMT3A | 2          | 25234374 | G         | A         | R882C       | 0.19                    | Additional TOPMED - MESA    |
| DNMT3A | 2          | 25234374 | G         | A         | R882C       | 0.18                    | COPDGene                    |
| DNMT3A | 2          | 25234374 | G         | A         | R882C       | 0.18                    | COPDGene                    |
| DNMT3A | 2          | 25234374 | G         | A         | R882C       | 0.18                    | UK Biobank                  |
| DNMT3A | 2          | 25234374 | G         | A         | R882C       | 0.17                    | UK Biobank                  |
| DNMT3A | 2          | 25234374 | G         | A         | R882C       | 0.16                    | Additional TOPMED - ARIC    |
| DNMT3A | 2          | 25234374 | G         | A         | R882C       | 0.16                    | Additional TOPMED - JHS     |
| DNMT3A | 2          | 25234374 | G         | A         | R882C       | 0.15                    | Additional TOPMED - ARIC    |
| DNMT3A | 2          | 25234374 | G         | A         | R882C       | 0.15                    | UK Biobank                  |
| DNMT3A | 2          | 25234374 | G         | A         | R882C       | 0.15                    | Additional TOPMED - JHS     |
| DNMT3A | 2          | 25234374 | G         | A         | R882C       | 0.14                    | COPDGene                    |
| DNMT3A | 2          | 25234374 | G         | A         | R882C       | 0.14                    | COPDGene                    |
| DNMT3A | 2          | 25234374 | G         | A         | R882C       | 0.14                    | COPDGene                    |
| DNMT3A | 2          | 25234374 | G         | A         | R882C       | 0.14                    | COPDGene                    |
| DNMT3A | 2          | 25234374 | G         | A         | R882C       | 0.13                    | UK Biobank                  |
| DNMT3A | 2          | 25234374 | G         | A         | R882C       | 0.13                    | UK Biobank                  |
| DNMT3A | 2          | 25234374 | G         | A         | R882C       | 0.12                    | UK Biobank                  |
| DNMT3A | 2          | 25234374 | G         | A         | R882C       | 0.11                    | Additional TOPMED - ECLIPSE |
| DNMT3A | 2          | 25234374 | G         | A         | R882C       | 0.11                    | Additional TOPMED - ARIC    |
| DNMT3A | 2          | 25234374 | G         | A         | R882C       | 0.10                    | UK Biobank                  |
| DNMT3A | 2          | 25234374 | G         | A         | R882C       | 0.10                    | COPDGene                    |
| DNMT3A | 2          | 25234374 | G         | A         | R882C       | 0.10                    | UK Biobank                  |
| DNMT3A | 2          | 25234374 | G         | A         | R882C       | 0.10                    | COPDGene                    |
| DNMT3A | 2          | 25234374 | G         | A         | R882C       | 0.10                    | Additional TOPMED - ARIC    |
| DNMT3A | 2          | 25234374 | G         | A         | R882C       | 0.10                    | UK Biobank                  |
| DNMT3A | 2          | 25234374 | G         | A         | R882C       | 0.09                    | UK Biobank                  |
| DNMT3A | 2          | 25234374 | G         | A         | R882C       | 0.09                    | UK Biobank                  |
| DNMT3A | 2          | 25234374 | G         | A         | R882C       | 0.09                    | UK Biobank                  |
| DNMT3A | 2          | 25234374 | G         | A         | R882C       | 0.09                    | UK Biobank                  |
| DNMT3A | 2          | 25234374 | G         | A         | R882C       | 0.08                    | Additional TOPMED - ARIC    |
| DNMT3A | 2          | 25234374 | G         | A         | R882C       | 0.08                    | UK Biobank                  |
| DNMT3A | 2          | 25234374 | G         | A         | R882C       | 0.07                    | UK Biobank                  |
| DNMT3A | 2          | 25234374 | G         | A         | R882C       | 0.05                    | UK Biobank                  |
| DNMT3A | 2          | 25234374 | G         | A         | R882C       | 0.05                    | UK Biobank                  |
| DNMT3A | 2          | 25234374 | G         | A         | R882C       | 0.05                    | UK Biobank                  |
| DNMT3A | 2          | 25234374 | G         | A         | R882C       | 0.05                    | UK Biobank                  |
| DNMT3A | 2          | 25234374 | G         | A         | R882C       | 0.05                    | UK Biobank                  |
| DNMT3A | 2          | 25234374 | G         | A         | R882C       | 0.05                    | UK Biobank                  |
| DNMT3A | 2          | 25234374 | G         | A         | R882C       | 0.04                    | UK Biobank                  |
| DNMT3A | 2          | 25234374 | G         | A         | R882C       | 0.03                    | UK Biobank                  |
| DNMT3A | 2          | 25234374 | G         | A         | R882C       | 0.03                    | UK Biobank                  |
| DNMT3A | 2          | 25234374 | G         | A         | R882C       | 0.03                    | UK Biobank                  |
| DNMT3A | 2          | 25234374 | G         | T         | R882S       | 0.31                    | COPDGene                    |
| DNMT3A | 2          | 25234374 | G         | T         | R882S       | 0.06                    | UK Biobank                  |
| DNMT3A | 2          | 25234373 | C         | T         | R882H       | 0.47                    | COPDGene                    |
| DNMT3A | 2          | 25234373 | C         | T         | R882H       | 0.42                    | Additional TOPMED - CFS     |
| DNMT3A | 2          | 25234373 | C         | T         | R882H       | 0.41                    | Additional TOPMED - ECLIPSE |
| DNMT3A | 2          | 25234373 | C         | T         | R882H       | 0.34                    | Additional TOPMED - FHS     |
| DNMT3A | 2          | 25234373 | C         | T         | R882H       | 0.34                    | UK Biobank                  |
| DNMT3A | 2          | 25234373 | C         | T         | R882H       | 0.33                    | Additional TOPMED - JHS     |
| DNMT3A | 2          | 25234373 | C         | T         | R882H       | 0.32                    | Additional TOPMED - ECLIPSE |
| DNMT3A | 2          | 25234373 | C         | T         | R882H       | 0.32                    | UK Biobank                  |
| DNMT3A | 2          | 25234373 | C         | T         | R882H       | 0.31                    | UK Biobank                  |
| DNMT3A | 2          | 25234373 | C         | T         | R882H       | 0.30                    | UK Biobank                  |
| DNMT3A | 2          | 25234373 | C         | T         | R882H       | 0.30                    | Additional TOPMED - JHS     |
| DNMT3A | 2          | 25234373 | C         | T         | R882H       | 0.30                    | COPDGene                    |
| DNMT3A | 2          | 25234373 | C         | T         | R882H       | 0.29                    | UK Biobank                  |
| DNMT3A | 2          | 25234373 | C         | T         | R882H       | 0.29                    | Additional TOPMED - ARIC    |
| DNMT3A | 2          | 25234373 | C         | T         | R882H       | 0.29                    | UK Biobank                  |
| DNMT3A | 2          | 25234373 | C         | T         | R882H       | 0.29                    | COPDGene                    |
| DNMT3A | 2          | 25234373 | C         | T         | R882H       | 0.29                    | UK Biobank                  |
| DNMT3A | 2          | 25234373 | C         | T         | R882H       | 0.28                    | Additional TOPMED - ECLIPSE |
| DNMT3A | 2          | 25234373 | C         | T         | R882H       | 0.28                    | UK Biobank                  |
| DNMT3A | 2          | 25234373 | C         | T         | R882H       | 0.27                    | COPDGene                    |
| DNMT3A | 2          | 25234373 | C         | T         | R882H       | 0.26                    | UK Biobank                  |
| DNMT3A | 2          | 25234373 | C         | T         | R882H       | 0.26                    | Additional TOPMED - MESA    |
| DNMT3A | 2          | 25234373 | C         | T         | R882H       | 0.25                    | UK Biobank                  |



| Gene   | Chromosome | Position | Reference | Alternate | Consequence | Variant Allele Fraction | Cohort                      |
|--------|------------|----------|-----------|-----------|-------------|-------------------------|-----------------------------|
| DNMT3A | 2          | 25234373 | C         | T         | R882H       | 0.24                    | UK Biobank                  |
| DNMT3A | 2          | 25234373 | C         | T         | R882H       | 0.24                    | COPDGene                    |
| DNMT3A | 2          | 25234373 | C         | T         | R882H       | 0.24                    | COPDGene                    |
| DNMT3A | 2          | 25234373 | C         | T         | R882H       | 0.24                    | Additional TOPMED - MESA    |
| DNMT3A | 2          | 25234373 | C         | T         | R882H       | 0.24                    | COPDGene                    |
| DNMT3A | 2          | 25234373 | C         | T         | R882H       | 0.23                    | UK Biobank                  |
| DNMT3A | 2          | 25234373 | C         | T         | R882H       | 0.22                    | COPDGene                    |
| DNMT3A | 2          | 25234373 | C         | T         | R882H       | 0.22                    | Additional TOPMED - CFS     |
| DNMT3A | 2          | 25234373 | C         | T         | R882H       | 0.22                    | COPDGene                    |
| DNMT3A | 2          | 25234373 | C         | T         | R882H       | 0.22                    | COPDGene                    |
| DNMT3A | 2          | 25234373 | C         | T         | R882H       | 0.21                    | UK Biobank                  |
| DNMT3A | 2          | 25234373 | C         | T         | R882H       | 0.21                    | UK Biobank                  |
| DNMT3A | 2          | 25234373 | C         | T         | R882H       | 0.19                    | COPDGene                    |
| DNMT3A | 2          | 25234373 | C         | T         | R882H       | 0.19                    | UK Biobank                  |
| DNMT3A | 2          | 25234373 | C         | T         | R882H       | 0.18                    | UK Biobank                  |
| DNMT3A | 2          | 25234373 | C         | T         | R882H       | 0.18                    | UK Biobank                  |
| DNMT3A | 2          | 25234373 | C         | T         | R882H       | 0.17                    | UK Biobank                  |
| DNMT3A | 2          | 25234373 | C         | T         | R882H       | 0.17                    | COPDGene                    |
| DNMT3A | 2          | 25234373 | C         | T         | R882H       | 0.17                    | UK Biobank                  |
| DNMT3A | 2          | 25234373 | C         | T         | R882H       | 0.16                    | COPDGene                    |
| DNMT3A | 2          | 25234373 | C         | T         | R882H       | 0.16                    | UK Biobank                  |
| DNMT3A | 2          | 25234373 | C         | T         | R882H       | 0.16                    | Additional TOPMED - ARIC    |
| DNMT3A | 2          | 25234373 | C         | T         | R882H       | 0.16                    | COPDGene                    |
| DNMT3A | 2          | 25234373 | C         | T         | R882H       | 0.15                    | UK Biobank                  |
| DNMT3A | 2          | 25234373 | C         | T         | R882H       | 0.15                    | Additional TOPMED - ECLIPSE |
| DNMT3A | 2          | 25234373 | C         | T         | R882H       | 0.15                    | UK Biobank                  |
| DNMT3A | 2          | 25234373 | C         | T         | R882H       | 0.15                    | UK Biobank                  |
| DNMT3A | 2          | 25234373 | C         | T         | R882H       | 0.15                    | UK Biobank                  |
| DNMT3A | 2          | 25234373 | C         | T         | R882H       | 0.14                    | UK Biobank                  |
| DNMT3A | 2          | 25234373 | C         | T         | R882H       | 0.13                    | Additional TOPMED - ARIC    |
| DNMT3A | 2          | 25234373 | C         | T         | R882H       | 0.13                    | UK Biobank                  |
| DNMT3A | 2          | 25234373 | C         | T         | R882H       | 0.12                    | Additional TOPMED - MESA    |
| DNMT3A | 2          | 25234373 | C         | T         | R882H       | 0.12                    | Additional TOPMED - ARIC    |
| DNMT3A | 2          | 25234373 | C         | T         | R882H       | 0.12                    | COPDGene                    |
| DNMT3A | 2          | 25234373 | C         | T         | R882H       | 0.12                    | COPDGene                    |
| DNMT3A | 2          | 25234373 | C         | T         | R882H       | 0.12                    | UK Biobank                  |
| DNMT3A | 2          | 25234373 | C         | T         | R882H       | 0.11                    | Additional TOPMED - JHS     |
| DNMT3A | 2          | 25234373 | C         | T         | R882H       | 0.11                    | UK Biobank                  |
| DNMT3A | 2          | 25234373 | C         | T         | R882H       | 0.11                    | COPDGene                    |
| DNMT3A | 2          | 25234373 | C         | T         | R882H       | 0.11                    | UK Biobank                  |
| DNMT3A | 2          | 25234373 | C         | T         | R882H       | 0.11                    | Additional TOPMED - ECLIPSE |
| DNMT3A | 2          | 25234373 | C         | T         | R882H       | 0.11                    | Additional TOPMED - CFS     |
| DNMT3A | 2          | 25234373 | C         | T         | R882H       | 0.11                    | COPDGene                    |
| DNMT3A | 2          | 25234373 | C         | T         | R882H       | 0.11                    | COPDGene                    |
| DNMT3A | 2          | 25234373 | C         | T         | R882H       | 0.11                    | UK Biobank                  |
| DNMT3A | 2          | 25234373 | C         | T         | R882H       | 0.11                    | UK Biobank                  |
| DNMT3A | 2          | 25234373 | C         | T         | R882H       | 0.10                    | Additional TOPMED - ARIC    |
| DNMT3A | 2          | 25234373 | C         | T         | R882H       | 0.10                    | UK Biobank                  |
| DNMT3A | 2          | 25234373 | C         | T         | R882H       | 0.10                    | COPDGene                    |
| DNMT3A | 2          | 25234373 | C         | T         | R882H       | 0.10                    | UK Biobank                  |
| DNMT3A | 2          | 25234373 | C         | T         | R882H       | 0.10                    | UK Biobank                  |
| DNMT3A | 2          | 25234373 | C         | T         | R882H       | 0.09                    | Additional TOPMED - MESA    |
| DNMT3A | 2          | 25234373 | C         | T         | R882H       | 0.09                    | UK Biobank                  |
| DNMT3A | 2          | 25234373 | C         | T         | R882H       | 0.08                    | UK Biobank                  |
| DNMT3A | 2          | 25234373 | C         | T         | R882H       | 0.08                    | UK Biobank                  |
| DNMT3A | 2          | 25234373 | C         | T         | R882H       | 0.08                    | UK Biobank                  |
| DNMT3A | 2          | 25234373 | C         | T         | R882H       | 0.07                    | UK Biobank                  |
| DNMT3A | 2          | 25234373 | C         | T         | R882H       | 0.07                    | UK Biobank                  |
| DNMT3A | 2          | 25234373 | C         | T         | R882H       | 0.07                    | UK Biobank                  |
| DNMT3A | 2          | 25234373 | C         | T         | R882H       | 0.07                    | UK Biobank                  |
| DNMT3A | 2          | 25234373 | C         | T         | R882H       | 0.06                    | UK Biobank                  |
| DNMT3A | 2          | 25234373 | C         | T         | R882H       | 0.06                    | UK Biobank                  |
| DNMT3A | 2          | 25234373 | C         | T         | R882H       | 0.06                    | UK Biobank                  |
| DNMT3A | 2          | 25234373 | C         | T         | R882H       | 0.06                    | UK Biobank                  |
| DNMT3A | 2          | 25234373 | C         | T         | R882H       | 0.05                    | UK Biobank                  |
| DNMT3A | 2          | 25234373 | C         | T         | R882H       | 0.05                    | UK Biobank                  |
| DNMT3A | 2          | 25234373 | C         | T         | R882H       | 0.05                    | UK Biobank                  |
| DNMT3A | 2          | 25234373 | C         | T         | R882H       | 0.05                    | UK Biobank                  |
| DNMT3A | 2          | 25234373 | C         | T         | R882H       | 0.05                    | UK Biobank                  |
| DNMT3A | 2          | 25234373 | C         | T         | R882H       | 0.05                    | UK Biobank                  |
| DNMT3A | 2          | 25234373 | C         | T         | R882H       | 0.05                    | UK Biobank                  |
| DNMT3A | 2          | 25234373 | C         | T         | R882H       | 0.04                    | UK Biobank                  |
| DNMT3A | 2          | 25234373 | C         | T         | R882H       | 0.04                    | UK Biobank                  |
| DNMT3A | 2          | 25234373 | C         | T         | R882H       | 0.04                    | UK Biobank                  |
| DNMT3A | 2          | 25234373 | C         | T         | R882H       | 0.03                    | UK Biobank                  |
| DNMT3A | 2          | 25234373 | C         | T         | R882H       | 0.03                    | UK Biobank                  |
| DNMT3A | 2          | 25234373 | C         | T         | R882H       | 0.03                    | UK Biobank                  |
| DNMT3A | 2          | 25234373 | C         | A         | R882L       | 0.16                    | UK Biobank                  |
| DNMT3A | 2          | 25234373 | C         | A         | R882L       | 0.10                    | UK Biobank                  |
| DNMT3A | 2          | 25234373 | C         | G         | R882P       | 0.28                    | COPDGene                    |
| DNMT3A | 2          | 25234372 | GC        | AG        | R882P       | 0.13                    | UK Biobank                  |
| DNMT3A | 2          | 25234370 | A         | T         | L883*       | 0.09                    | UK Biobank                  |
| DNMT3A | 2          | 25234369 | CA        | C         | L883fs      | 0.15                    | Additional TOPMED - FHS     |
| DNMT3A | 2          | 25234367 | G         | A         | A884V       | 0.05                    | UK Biobank                  |
| DNMT3A | 2          | 25234365 | TC        | T         | R885fs      | 0.15                    | UK Biobank                  |
| DNMT3A | 2          | 25234362 | G         | A         | Q886X       | 0.24                    | Additional TOPMED - MESA    |
| DNMT3A | 2          | 25234362 | G         | A         | Q886X       | 0.15                    | COPDGene                    |
| DNMT3A | 2          | 25234362 | G         | A         | Q886X       | 0.14                    | Additional TOPMED - JHS     |
| DNMT3A | 2          | 25234362 | G         | A         | Q886X       | 0.12                    | Additional TOPMED - ECLIPSE |
| DNMT3A | 2          | 25234356 | GTC       | G         | R887fs      | 0.12                    | UK Biobank                  |
| DNMT3A | 2          | 25234349 | C         | T         | G890D       | 0.12                    | UK Biobank                  |
| DNMT3A | 2          | 25234349 | C         | T         | G890D       | 0.08                    | UK Biobank                  |
| DNMT3A | 2          | 25234348 | G         | GC        | R891fs      | 0.06                    | UK Biobank                  |
| DNMT3A | 2          | 25234346 | CG        | C         | R891fs      | 0.08                    | UK Biobank                  |
| DNMT3A | 2          | 25234346 | CG        | C         | R891fs      | 0.04                    | UK Biobank                  |
| DNMT3A | 2          | 25234341 | A         | G         | W893R       | 0.10                    | UK Biobank                  |
| DNMT3A | 2          | 25234340 | C         | G         | W893S       | 0.13                    | UK Biobank                  |
| DNMT3A | 2          | 25234339 | CC        | AG        | W893S       | 0.17                    | UK Biobank                  |
| DNMT3A | 2          | 25234339 | C         | T         | W893X       | 0.11                    | Additional TOPMED - FHS     |
| DNMT3A | 2          | 25234338 | T         | TC        | S894fs      | 0.22                    | UK Biobank                  |
| DNMT3A | 2          | 25234336 | G         | C         | S894R       | 0.07                    | UK Biobank                  |

| Gene   | Chromosome | Position  | Reference | Alternate | Consequence | Variant Allele Fraction | Cohort                      |
|--------|------------|-----------|-----------|-----------|-------------|-------------------------|-----------------------------|
| DNMT3A | 2          | 25234336  | G         | T         | S894R       | 0.03                    | UK Biobank                  |
| DNMT3A | 2          | 25234335  | C         | T         | V895M       | 0.11                    | Additional TOPMED - ARIC    |
| DNMT3A | 2          | 25234331  | G         | A         | P896L       | 0.32                    | UK Biobank                  |
| DNMT3A | 2          | 25234331  | G         | T         | P896Q       | 0.04                    | UK Biobank                  |
| DNMT3A | 2          | 25234328  | G         | C         | V897G       | 0.20                    | COPDGene                    |
| DNMT3A | 2          | 25234327  | GA        | G         | V897fs      | 0.03                    | UK Biobank                  |
| DNMT3A | 2          | 25234324  | GA        | G         | I898fs      | 0.05                    | UK Biobank                  |
| DNMT3A | 2          | 25234323  | GGAT      | G         | I898del     | 0.05                    | UK Biobank                  |
| DNMT3A | 2          | 25234323  | G         | A         | R899C       | 0.20                    | UK Biobank                  |
| DNMT3A | 2          | 25234323  | G         | A         | R899C       | 0.16                    | Additional TOPMED - MESA    |
| DNMT3A | 2          | 25234323  | G         | A         | R899C       | 0.13                    | Additional TOPMED - MESA    |
| DNMT3A | 2          | 25234323  | G         | A         | R899C       | 0.12                    | Additional TOPMED - JHS     |
| DNMT3A | 2          | 25234323  | G         | A         | R899C       | 0.11                    | UK Biobank                  |
| DNMT3A | 2          | 25234323  | G         | A         | R899C       | 0.09                    | UK Biobank                  |
| DNMT3A | 2          | 25234323  | G         | A         | R899C       | 0.09                    | COPDGene                    |
| DNMT3A | 2          | 25234323  | G         | A         | R899C       | 0.06                    | UK Biobank                  |
| DNMT3A | 2          | 25234323  | G         | A         | R899C       | 0.04                    | UK Biobank                  |
| DNMT3A | 2          | 25234323  | G         | A         | R899C       | 0.03                    | UK Biobank                  |
| DNMT3A | 2          | 25234322  | CG        | C         | R899fs      | 0.25                    | Additional TOPMED - ECLIPSE |
| DNMT3A | 2          | 25234322  | C         | T         | R899H       | 0.03                    | UK Biobank                  |
| DNMT3A | 2          | 25234316  | AG        | A         | L901fs      | 0.04                    | UK Biobank                  |
| DNMT3A | 2          | 25234316  | A         | G         | L901P       | 0.15                    | Additional TOPMED - ARIC    |
| DNMT3A | 2          | 25234316  | A         | G         | L901P       | 0.10                    | COPDGene                    |
| DNMT3A | 2          | 25234316  | A         | G         | L901P       | 0.04                    | UK Biobank                  |
| DNMT3A | 2          | 25234316  | A         | C         | L901R       | 0.18                    | Additional TOPMED - JHS     |
| DNMT3A | 2          | 25234316  | A         | C         | L901R       | 0.16                    | Additional TOPMED - FHS     |
| DNMT3A | 2          | 25234311  | C         | T         | A903T       | 0.31                    | Additional TOPMED - JHS     |
| DNMT3A | 2          | 25234311  | C         | T         | A903T       | 0.03                    | UK Biobank                  |
| DNMT3A | 2          | 25234309  | AGC       | A         | A903fs      | 0.05                    | UK Biobank                  |
| DNMT3A | 2          | 25234308  | G         | C         | P904A       | 0.10                    | UK Biobank                  |
| DNMT3A | 2          | 25234307  | G         | A         | P904L       | 0.40                    | COPDGene                    |
| DNMT3A | 2          | 25234307  | G         | A         | P904L       | 0.30                    | UK Biobank                  |
| DNMT3A | 2          | 25234307  | G         | A         | P904L       | 0.20                    | UK Biobank                  |
| DNMT3A | 2          | 25234307  | G         | A         | P904L       | 0.14                    | UK Biobank                  |
| DNMT3A | 2          | 25234307  | G         | A         | P904L       | 0.14                    | Additional TOPMED - ARIC    |
| DNMT3A | 2          | 25234307  | G         | A         | P904L       | 0.13                    | COPDGene                    |
| DNMT3A | 2          | 25234307  | G         | A         | P904L       | 0.12                    | COPDGene                    |
| DNMT3A | 2          | 25234307  | G         | A         | P904L       | 0.12                    | COPDGene                    |
| DNMT3A | 2          | 25234307  | G         | A         | P904L       | 0.12                    | COPDGene                    |
| DNMT3A | 2          | 25234307  | G         | A         | P904L       | 0.11                    | Additional TOPMED - MESA    |
| DNMT3A | 2          | 25234307  | G         | A         | P904L       | 0.10                    | UK Biobank                  |
| DNMT3A | 2          | 25234307  | G         | A         | P904L       | 0.09                    | UK Biobank                  |
| DNMT3A | 2          | 25234307  | G         | A         | P904L       | 0.08                    | UK Biobank                  |
| DNMT3A | 2          | 25234307  | G         | A         | P904L       | 0.06                    | UK Biobank                  |
| DNMT3A | 2          | 25234307  | G         | A         | P904L       | 0.06                    | UK Biobank                  |
| DNMT3A | 2          | 25234307  | G         | A         | P904L       | 0.06                    | UK Biobank                  |
| DNMT3A | 2          | 25234307  | G         | A         | P904L       | 0.06                    | UK Biobank                  |
| DNMT3A | 2          | 25234307  | G         | A         | P904L       | 0.06                    | UK Biobank                  |
| DNMT3A | 2          | 25234307  | G         | A         | P904L       | 0.05                    | UK Biobank                  |
| DNMT3A | 2          | 25234307  | G         | A         | P904L       | 0.05                    | UK Biobank                  |
| DNMT3A | 2          | 25234307  | G         | A         | P904L       | 0.04                    | UK Biobank                  |
| DNMT3A | 2          | 25234307  | G         | A         | P904L       | 0.04                    | UK Biobank                  |
| DNMT3A | 2          | 25234307  | G         | A         | P904L       | 0.03                    | UK Biobank                  |
| DNMT3A | 2          | 25234307  | G         | A         | P904L       | 0.03                    | UK Biobank                  |
| DNMT3A | 2          | 25234307  | G         | A         | P904L       | 0.03                    | UK Biobank                  |
| DNMT3A | 2          | 25234307  | G         | A         | P904L       | 0.02                    | UK Biobank                  |
| DNMT3A | 2          | 25234307  | G         | T         | P904Q       | 0.17                    | COPDGene                    |
| DNMT3A | 2          | 25234306  | CG        | C         | P904fs      | 0.05                    | UK Biobank                  |
| DNMT3A | 2          | 25234304  | A         | T         | L905Q       | 0.14                    | UK Biobank                  |
| DNMT3A | 2          | 25234303  | C         | CA        | L905fs      | 0.17                    | Additional TOPMED - ARIC    |
| DNMT3A | 2          | 25234300  | C         | CT        | E907fs      | 0.06                    | UK Biobank                  |
| DNMT3A | 2          | 25234300  | CT        | C         | K906fs      | 0.06                    | UK Biobank                  |
| DNMT3A | 2          | 25234299  | C         | A         | E907*       | 0.11                    | UK Biobank                  |
| DNMT3A | 2          | 25234298  | T         | TC        | E907fs      | 0.08                    | UK Biobank                  |
| DNMT3A | 2          | 25234296  | A         | ACTC      | 907_908insE | 0.07                    | UK Biobank                  |
| DNMT3A | 2          | 25234296  | A         | C         | Y908D       | 0.10                    | Additional TOPMED - ARIC    |
| DNMT3A | 2          | 25234296  | A         | T         | Y908N       | 0.14                    | UK Biobank                  |
| DNMT3A | 2          | 25234295  | T         | C         | Y908C       | 0.15                    | COPDGene                    |
| DNMT3A | 2          | 25234295  | T         | C         | Y908C       | 0.14                    | UK Biobank                  |
| DNMT3A | 2          | 25234295  | T         | C         | Y908C       | 0.05                    | UK Biobank                  |
| DNMT3A | 2          | 25234295  | T         | C         | Y908C       | 0.03                    | UK Biobank                  |
| DNMT3A | 2          | 25234295  | T         | C         | Y908C       | 0.03                    | UK Biobank                  |
| DNMT3A | 2          | 25234294  | A         | C         | Y908*       | 0.06                    | UK Biobank                  |
| DNMT3A | 2          | 25234294  | A         | C         | Y908X       | 0.19                    | Additional TOPMED - MESA    |
| DNMT3A | 2          | 25234292  | A         | C         | F909C       | 0.23                    | COPDGene                    |
| DNMT3A | 2          | 25234292  | A         | G         | F909S       | 0.20                    | UK Biobank                  |
| DNMT3A | 2          | 25234292  | A         | G         | F909S       | 0.12                    | UK Biobank                  |
| DNMT3A | 2          | 25234290  | C         | G         | A910P       | 0.04                    | UK Biobank                  |
| DNMT3A | 2          | 25234290  | CAA       | C         | F909fs      | 0.05                    | UK Biobank                  |
| DNMT3A | 2          | 25234289  | G         | T         | A910E       | 0.03                    | UK Biobank                  |
| DNMT3A | 2          | 25234289  | G         | A         | A910V       | 0.16                    | UK Biobank                  |
| DNMT3A | 2          | 25234289  | G         | A         | A910V       | 0.12                    | COPDGene                    |
| DNMT3A | 2          | 25234289  | G         | A         | A910V       | 0.08                    | UK Biobank                  |
| DNMT3A | 2          | 25234286  | C         | T         | C911Y       | 0.12                    | Additional TOPMED - MESA    |
| DNMT3A | 2          | 25234286  | C         | T         | C911Y       | 0.03                    | UK Biobank                  |
| DNMT3A | 2          | 25234286  | C         | T         | C911Y       | 0.02                    | UK Biobank                  |
| EED    | 11         | 85988028  | G         | T         | E325*       | 0.07                    | ICGN-EOCOCPD                |
| EP300  | 22         | 41137655  | C         | CTTTTTT   | P542fs      | 0.09                    | COPDGene                    |
| ETNK1  | 12         | 22659061  | A         | G         | N244S       | 0.30                    | UK Biobank                  |
| ETNK1  | 12         | 22659061  | A         | G         | N244S       | 0.29                    | Additional TOPMED - FHS     |
| ETNK1  | 12         | 22659061  | A         | G         | N244S       | 0.25                    | COPDGene                    |
| ETNK1  | 12         | 22659061  | A         | G         | N244S       | 0.12                    | Additional TOPMED - FHS     |
| ETV6   | 12         | 11884573  | TG        | T         | W380fs      | 0.18                    | COPDGene                    |
| ETV6   | 12         | 11884446  | C         | A         | D337E       | 0.05                    | UK Biobank                  |
| ETV6   | 12         | 11889601  | CG        | C         | P214fs      | 0.25                    | COPDGene                    |
| ETV6   | 12         | 11853514  | CTA       | C         | S139fs      | 0.17                    | Additional TOPMED - ECLIPSE |
| ETV6   | 12         | 11839289  | CG        | C         | R105fs      | 0.12                    | COPDGene                    |
| ETV6   | 12         | 11752531  | C         | T         | R39*        | 0.33                    | UK Biobank                  |
| EZH2   | 7          | 148826615 | GC        | T         | E249fs      | 0.15                    | COPDGene                    |
| EZH2   | 7          | 148815507 | CT        | C         | K510fs      | 0.07                    | UK Biobank                  |
| EZH2   | 7          | 148814014 | C         | T         | W594X       | 0.69                    | COPDGene                    |

| Gene  | Chromosome | Position  | Reference                                                                 | Alternate | Consequence                                                                                        | Variant Allele Fraction | Cohort                      |
|-------|------------|-----------|---------------------------------------------------------------------------|-----------|----------------------------------------------------------------------------------------------------|-------------------------|-----------------------------|
| EZH2  | 7          | 148809381 | AC                                                                        | A         | V675fs                                                                                             | 0.05                    | UK Biobank                  |
| EZH2  | 7          | 148512130 | G                                                                         | C         | D511E                                                                                              | 0.12                    | ICGN-EEOCPD                 |
| GATA2 | 3          | 128485998 | AC                                                                        | A         | G200fs                                                                                             | 0.09                    | UK Biobank                  |
| GNAS  | 20         | 58910765  | G                                                                         | A         | R374H                                                                                              | 0.15                    | Additional TOPMED - ECLIPSE |
| GNAS  | 20         | 58910761  | C                                                                         | T         | R373C                                                                                              | 0.50                    | Additional TOPMED - CFS     |
| GNAS  | 20         | 58909542  | G                                                                         | C         | Q227H                                                                                              | 0.19                    | Additional TOPMED - FHS     |
| GNAS  | 20         | 58909542  | G                                                                         | T         | Q227H                                                                                              | 0.11                    | COPDGene                    |
| GNAS  | 20         | 58909542  | G                                                                         | T         | Q227H                                                                                              | 0.08                    | UK Biobank                  |
| GNAS  | 20         | 58909366  | G                                                                         | A         | R201H                                                                                              | 0.25                    | Additional TOPMED - ARIC    |
| GNAS  | 20         | 58909366  | G                                                                         | A         | R201H                                                                                              | 0.15                    | Additional TOPMED - MESA    |
| GNAS  | 20         | 58909366  | G                                                                         | A         | R201H                                                                                              | 0.14                    | UK Biobank                  |
| GNAS  | 20         | 58909366  | G                                                                         | A         | R201H                                                                                              | 0.14                    | UK Biobank                  |
| GNAS  | 20         | 58909366  | G                                                                         | A         | R201H                                                                                              | 0.13                    | Additional TOPMED - ECLIPSE |
| GNAS  | 20         | 58909366  | G                                                                         | A         | R201H                                                                                              | 0.10                    | COPDGene                    |
| GNAS  | 20         | 58909366  | G                                                                         | A         | R201H                                                                                              | 0.09                    | UK Biobank                  |
| GNAS  | 20         | 58909366  | G                                                                         | A         | R201H                                                                                              | 0.08                    | Additional TOPMED - MESA    |
| GNAS  | 20         | 58909366  | G                                                                         | A         | R201H                                                                                              | 0.07                    | UK Biobank                  |
| GNAS  | 20         | 58909366  | G                                                                         | A         | R201H                                                                                              | 0.06                    | UK Biobank                  |
| GNAS  | 20         | 58909366  | G                                                                         | A         | R201H                                                                                              | 0.05                    | UK Biobank                  |
| GNAS  | 20         | 58909365  | C                                                                         | T         | R201C                                                                                              | 0.09                    | COPDGene                    |
| GNAS  | 20         | 58909365  | C                                                                         | T         | R201C                                                                                              | 0.08                    | Additional TOPMED - ARIC    |
| GNAS  | 20         | 58909365  | C                                                                         | T         | R201C                                                                                              | 0.07                    | Additional TOPMED - FHS     |
| GNAS  | 20         | 58909365  | C                                                                         | T         | R201C                                                                                              | 0.06                    | UK Biobank                  |
| GNB1  | 1          | 1815790   | T                                                                         | C         | K57E                                                                                               | 0.36                    | UK Biobank                  |
| GNB1  | 1          | 1815790   | T                                                                         | C         | K57E                                                                                               | 0.26                    | Additional TOPMED - MESA    |
| GNB1  | 1          | 1815790   | T                                                                         | C         | K57E                                                                                               | 0.22                    | UK Biobank                  |
| GNB1  | 1          | 1815790   | T                                                                         | C         | K57E                                                                                               | 0.18                    | UK Biobank                  |
| GNB1  | 1          | 1815790   | T                                                                         | C         | K57E                                                                                               | 0.15                    | UK Biobank                  |
| GNB1  | 1          | 1815790   | T                                                                         | C         | K57E                                                                                               | 0.13                    | Additional TOPMED - JHS     |
| GNB1  | 1          | 1815790   | T                                                                         | C         | K57E                                                                                               | 0.12                    | COPDGene                    |
| GNB1  | 1          | 1815790   | T                                                                         | C         | K57E                                                                                               | 0.11                    | UK Biobank                  |
| GNB1  | 1          | 1815790   | T                                                                         | C         | K57E                                                                                               | 0.10                    | UK Biobank                  |
| GNB1  | 1          | 1815790   | T                                                                         | C         | K57E                                                                                               | 0.09                    | UK Biobank                  |
| GNB1  | 1          | 1815790   | T                                                                         | C         | K57E                                                                                               | 0.09                    | UK Biobank                  |
| GNB1  | 1          | 1815790   | T                                                                         | C         | K57E                                                                                               | 0.08                    | UK Biobank                  |
| GNB1  | 1          | 1815790   | T                                                                         | C         | K57E                                                                                               | 0.06                    | UK Biobank                  |
| IDH1  | 2          | 208248388 | C                                                                         | T         | R132H                                                                                              | 0.20                    | Additional TOPMED - ECLIPSE |
| IDH1  | 2          | 208248388 | C                                                                         | T         | R132H                                                                                              | 0.13                    | COPDGene                    |
| IDH2  | 15         | 90088703  | G                                                                         | A         | R140W                                                                                              | 0.40                    | Additional TOPMED - FHS     |
| IDH2  | 15         | 90088702  | C                                                                         | T         | R140Q                                                                                              | 0.17                    | UK Biobank                  |
| IDH2  | 15         | 90088702  | C                                                                         | T         | R140Q                                                                                              | 0.14                    | Additional TOPMED - ECLIPSE |
| IDH2  | 15         | 90088702  | C                                                                         | T         | R140Q                                                                                              | 0.13                    | Additional TOPMED - JHS     |
| IDH2  | 15         | 90088702  | C                                                                         | T         | R140Q                                                                                              | 0.13                    | UK Biobank                  |
| IDH2  | 15         | 90088702  | C                                                                         | T         | R140Q                                                                                              | 0.13                    | COPDGene                    |
| IDH2  | 15         | 90088702  | C                                                                         | T         | R140Q                                                                                              | 0.07                    | UK Biobank                  |
| IKZF1 | 7          | 50400310  | AC                                                                        | A         | N416fs                                                                                             | 0.03                    | UK Biobank                  |
| IKZF2 | 2          | 213007512 | G                                                                         | A         | R477X                                                                                              | 0.10                    | Additional TOPMED - ECLIPSE |
| JAK2  | 9          | 5073770   | G                                                                         | T         | V617F                                                                                              | 0.95                    | UK Biobank                  |
| JAK2  | 9          | 5073770   | G                                                                         | T         | V617F                                                                                              | 0.94                    | Additional TOPMED - JHS     |
| JAK2  | 9          | 5073770   | G                                                                         | T         | V617F                                                                                              | 0.78                    | UK Biobank                  |
| JAK2  | 9          | 5073770   | G                                                                         | T         | V617F                                                                                              | 0.72                    | Additional TOPMED - ARIC    |
| JAK2  | 9          | 5073770   | G                                                                         | T         | V617F                                                                                              | 0.65                    | COPDGene                    |
| JAK2  | 9          | 5073770   | G                                                                         | T         | V617F                                                                                              | 0.65                    | COPDGene                    |
| JAK2  | 9          | 5073770   | G                                                                         | T         | V617F                                                                                              | 0.48                    | Additional TOPMED - JHS     |
| JAK2  | 9          | 5073770   | G                                                                         | T         | V617F                                                                                              | 0.44                    | Additional TOPMED - FHS     |
| JAK2  | 9          | 5073770   | G                                                                         | T         | V617F                                                                                              | 0.43                    | COPDGene                    |
| JAK2  | 9          | 5073770   | G                                                                         | T         | V617F                                                                                              | 0.35                    | UK Biobank                  |
| JAK2  | 9          | 5073770   | G                                                                         | T         | V617F                                                                                              | 0.34                    | COPDGene                    |
| JAK2  | 9          | 5073770   | G                                                                         | T         | V617F                                                                                              | 0.31                    | UK Biobank                  |
| JAK2  | 9          | 5073770   | G                                                                         | T         | V617F                                                                                              | 0.30                    | Additional TOPMED - ARIC    |
| JAK2  | 9          | 5073770   | G                                                                         | T         | V617F                                                                                              | 0.29                    | UK Biobank                  |
| JAK2  | 9          | 5073770   | G                                                                         | T         | V617F                                                                                              | 0.27                    | Additional TOPMED - ARIC    |
| JAK2  | 9          | 5073770   | G                                                                         | T         | V617F                                                                                              | 0.25                    | Additional TOPMED - JHS     |
| JAK2  | 9          | 5073770   | G                                                                         | T         | V617F                                                                                              | 0.25                    | UK Biobank                  |
| JAK2  | 9          | 5073770   | G                                                                         | T         | V617F                                                                                              | 0.24                    | UK Biobank                  |
| JAK2  | 9          | 5073770   | G                                                                         | T         | V617F                                                                                              | 0.24                    | Additional TOPMED - MESA    |
| JAK2  | 9          | 5073770   | G                                                                         | T         | V617F                                                                                              | 0.23                    | UK Biobank                  |
| JAK2  | 9          | 5073770   | G                                                                         | T         | V617F                                                                                              | 0.22                    | Additional TOPMED - ECLIPSE |
| JAK2  | 9          | 5073770   | G                                                                         | T         | V617F                                                                                              | 0.20                    | UK Biobank                  |
| JAK2  | 9          | 5073770   | G                                                                         | T         | V617F                                                                                              | 0.19                    | UK Biobank                  |
| JAK2  | 9          | 5073770   | G                                                                         | T         | V617F                                                                                              | 0.18                    | UK Biobank                  |
| JAK2  | 9          | 5073770   | G                                                                         | T         | V617F                                                                                              | 0.18                    | Additional TOPMED - FHS     |
| JAK2  | 9          | 5073770   | G                                                                         | T         | V617F                                                                                              | 0.17                    | UK Biobank                  |
| JAK2  | 9          | 5073770   | G                                                                         | T         | V617F                                                                                              | 0.14                    | Additional TOPMED - MESA    |
| JAK2  | 9          | 5073770   | G                                                                         | T         | V617F                                                                                              | 0.14                    | UK Biobank                  |
| JAK2  | 9          | 5073770   | G                                                                         | T         | V617F                                                                                              | 0.14                    | Additional TOPMED - FHS     |
| JAK2  | 9          | 5073770   | G                                                                         | T         | V617F                                                                                              | 0.14                    | Additional TOPMED - ARIC    |
| JAK2  | 9          | 5073770   | G                                                                         | T         | V617F                                                                                              | 0.13                    | UK Biobank                  |
| JAK2  | 9          | 5073770   | G                                                                         | T         | V617F                                                                                              | 0.13                    | COPDGene                    |
| JAK2  | 9          | 5073770   | G                                                                         | T         | V617F                                                                                              | 0.12                    | COPDGene                    |
| JAK2  | 9          | 5073770   | G                                                                         | T         | V617F                                                                                              | 0.12                    | UK Biobank                  |
| JAK2  | 9          | 5073770   | G                                                                         | T         | V617F                                                                                              | 0.12                    | COPDGene                    |
| JAK2  | 9          | 5073770   | G                                                                         | T         | V617F                                                                                              | 0.12                    | UK Biobank                  |
| JAK2  | 9          | 5073770   | G                                                                         | T         | V617F                                                                                              | 0.11                    | COPDGene                    |
| JAK2  | 9          | 5073770   | G                                                                         | T         | V617F                                                                                              | 0.11                    | COPDGene                    |
| JAK2  | 9          | 5073770   | G                                                                         | T         | V617F                                                                                              | 0.09                    | COPDGene                    |
| JAK2  | 9          | 5073770   | G                                                                         | T         | V617F                                                                                              | 0.09                    | Additional TOPMED - ARIC    |
| JAK2  | 9          | 5070022   | TCACAAA                                                                   | T         | HK538del                                                                                           | 0.10                    | UK Biobank                  |
| KDM6A | X          | 45107495  | CG                                                                        | C         | T1323fs                                                                                            | 0.10                    | UK Biobank                  |
| KDM6A | X          | 45083582  | TG                                                                        | T         | M1136fs                                                                                            | 0.11                    | COPDGene                    |
| KDM6A | X          | 45082640  | AGTAAGTCATTTTTAATGCCACTTAGTATTTCTTTTAAAGGCATGTTTCTAATACTGTGTCTCTTTT TTAAG | A         | c.e21+0AGTAAGTCATTTTTAATGTCCA<br>CTTAGTATTTCTTTT<br>TAAAGGCATGTTT<br>CTAATACTGTGTCT<br>CTTTTTAAG>A | 0.20                    | UK Biobank                  |
| KDM6A | X          | 45082640  | A                                                                         | G         | N1070S                                                                                             | 0.10                    | UK Biobank                  |
| KDM6A | X          | 45069839  | TGAACAAGCAG                                                               | T         | E729fs                                                                                             | 0.13                    | Additional TOPMED - ARIC    |
| KDM6A | X          | 45069836  | GC                                                                        | G         | F728fs                                                                                             | 0.09                    | UK Biobank                  |
| KDM6A | X          | 45069783  | C                                                                         | T         | Q710X                                                                                              | 0.90                    | COPDGene                    |
| KDM6A | X          | 45063556  | TCAGCC                                                                    | T         | Q555fs                                                                                             | 0.10                    | Additional TOPMED - ECLIPSE |
| KDM6A | X          | 45020659  | C                                                                         | T         | R165*                                                                                              | 0.08                    | UK Biobank                  |
| KDM6A | X          | 45020659  | C                                                                         | T         | R165X                                                                                              | 0.79                    | Additional TOPMED - FHS     |
| KDM6A | X          | 44922952  | G                                                                         | T         | G605*                                                                                              | 0.06                    | ICGN-EEOCPD                 |

| Gene  | Chromosome | Position  | Reference          | Alternate | Consequence | Variant Allele Fraction | Cohort                      |
|-------|------------|-----------|--------------------|-----------|-------------|-------------------------|-----------------------------|
| KRAS  | 12         | 25380277  | G                  | T         | G61K        | 0.06                    | ICGN-EOCPD                  |
| KRAS  | 12         | 25245350  | C                  | A         | G12V        | 0.05                    | UK Biobank                  |
| KRAS  | 12         | 25245347  | C                  | T         | G13D        | 0.29                    | Additional TOPMED - FHS     |
| KRAS  | 12         | 25245345  | C                  | T         | V14I        | 0.05                    | UK Biobank                  |
| KRAS  | 12         | 25225714  | T                  | C         | K117R       | 0.11                    | UK Biobank                  |
| KRAS  | 12         | 25225713  | T                  | A         | K117N       | 0.28                    | Additional TOPMED - ECLIPSE |
| KRAS  | 12         | 25225627  | G                  | A         | A146V       | 0.19                    | COPDGene                    |
| KRAS  | 12         | 25225627  | G                  | A         | A146V       | 0.17                    | UK Biobank                  |
| MPL   | 1          | 43349352  | C                  | A         | H520N       | 0.08                    | UK Biobank                  |
| MPL   | 1          | 43349338  | G                  | T         | W515L       | 0.20                    | Additional TOPMED - FHS     |
| MPL   | 1          | 43349311  | C                  | T         | A506V       | 0.06                    | UK Biobank                  |
| NF1   | 17         | 31358481  | C                  | T         | H2658Y      | 0.11                    | UK Biobank                  |
| NF1   | 17         | 31350209  | C                  | T         | R2450*      | 0.07                    | UK Biobank                  |
| NF1   | 17         | 31338733  | CACCT              | C         | T2263fs     | 0.18                    | Additional TOPMED - JHS     |
| NF1   | 17         | 31337858  | C                  | T         | Q2207X      | 0.12                    | Additional TOPMED - ECLIPSE |
| NF1   | 17         | 31260462  | TC                 | T         | R1509fs     | 0.24                    | UK Biobank                  |
| NF1   | 17         | 31258409  | TATCA              | T         | N1415fs     | 0.18                    | UK Biobank                  |
| NF1   | 17         | 31235728  | C                  | T         | R1276X      | 0.22                    | Additional TOPMED - MESA    |
| NF1   | 17         | 31229118  | C                  | T         | Q835*       | 0.20                    | UK Biobank                  |
| NF1   | 17         | 31226459  | A                  | AC        | I679fs      | 0.11                    | UK Biobank                  |
| NF1   | 17         | 31214479  | GC                 | G         | S474fs      | 0.32                    | Additional TOPMED - ECLIPSE |
| NF1   | 17         | 31201083  | CT                 | C         | P370fs      | 0.22                    | COPDGene                    |
| NF1   | 17         | 31182537  | GA                 | G         | D254fs      | 0.06                    | UK Biobank                  |
| NF1   | 17         | 29685993  | GT                 | G         | F2708fs     | 0.14                    | ICGN-EOCPD                  |
| NRAS  | 1          | 114713912 | C                  | T         | G60R        | 0.13                    | UK Biobank                  |
| PSSSB | 13         | 32758086  | G                  | T         | c.3057-1G>T | 0.13                    | Additional TOPMED - JHS     |
| PSSSB | 13         | 32710081  | GA                 | G         | E700fs      | 0.12                    | Additional TOPMED - MESA    |
| PSSSB | 13         | 32687286  | A                  | A         | c.e12+1G>A  | 0.13                    | UK Biobank                  |
| PSSSB | 13         | 32687279  | G                  | ATG       | D450fs      | 0.13                    | COPDGene                    |
| PSSSB | 13         | 32673357  | G                  | GT        | c.846+1->T  | 0.35                    | COPDGene                    |
| PHF6  | X          | 134417220 | G                  | C         | A296P       | 0.22                    | UK Biobank                  |
| PHF6  | X          | 134413562 | A                  | T         | K164X       | 0.58                    | Additional TOPMED - FHS     |
| PHF6  | X          | 134378042 | A                  | G         | N59S        | 0.23                    | UK Biobank                  |
| PHF6  | X          | 133512112 | G                  | T         | K72N        | 0.07                    | ICGN-EOCPD                  |
| PHIP  | 6          | 79724872  | GAA                | G         | S484fs      | 0.12                    | ICGN-EOCPD                  |
| PHIP  | 6          | 79668210  | AG                 | A         | L1255fs     | 0.02                    | ICGN-EOCPD                  |
| PHIP  | 6          | 79664644  | G                  | A         | Q1314*      | 0.06                    | ICGN-EOCPD                  |
| PHIP  | 6          | 79060791  | C                  | CAG       | D73fs       | 0.32                    | COPDGene                    |
| PHIP  | 6          | 79025518  | CTTTAT             | C         | I307fs      | 0.28                    | Additional TOPMED - ECLIPSE |
| PHIP  | 6          | 78963165  | C                  | T         | W1156X      | 0.13                    | COPDGene                    |
| PHIP  | 6          | 78958595  | ACCCGCCCT          | A         | R1219fs     | 0.10                    | COPDGene                    |
| PHIP  | 6          | 78947703  | C                  | A         | E1376X      | 0.37                    | COPDGene                    |
| PHIP  | 6          | 78946770  | TATGGTATTTCTTTTATG | T         | H1432fs     | 0.50                    | COPDGene                    |
| PPM1D | 17         | 60663536  | CTGTT              | C         | C603fs      | 0.51                    | UK Biobank                  |
| PPM1D | 17         | 60663506  | GA                 | G         | N592fs      | 0.41                    | UK Biobank                  |
| PPM1D | 17         | 60663475  | C                  | T         | R581*       | 0.45                    | UK Biobank                  |
| PPM1D | 17         | 60663475  | C                  | T         | R581*       | 0.23                    | UK Biobank                  |
| PPM1D | 17         | 60663475  | C                  | T         | R581*       | 0.17                    | UK Biobank                  |
| PPM1D | 17         | 60663475  | C                  | T         | R581X       | 0.42                    | Additional TOPMED - ECLIPSE |
| PPM1D | 17         | 60663455  | ACT                | A         | N574fs      | 0.12                    | Additional TOPMED - ECLIPSE |
| PPM1D | 17         | 60663448  | C                  | T         | R572X       | 0.52                    | Additional TOPMED - ECLIPSE |
| PPM1D | 17         | 60663448  | C                  | T         | R572X       | 0.16                    | COPDGene                    |
| PPM1D | 17         | 60663388  | C                  | T         | R552*       | 0.11                    | UK Biobank                  |
| PPM1D | 17         | 60663388  | C                  | T         | R552*       | 0.10                    | UK Biobank                  |
| PPM1D | 17         | 60663388  | C                  | T         | R552*       | 0.05                    | UK Biobank                  |
| PPM1D | 17         | 60663388  | C                  | T         | R552X       | 0.16                    | Additional TOPMED - ECLIPSE |
| PPM1D | 17         | 60663388  | C                  | T         | R552X       | 0.14                    | Additional TOPMED - JHS     |
| PPM1D | 17         | 60663388  | C                  | T         | R552X       | 0.13                    | Additional TOPMED - ECLIPSE |
| PPM1D | 17         | 60663388  | C                  | T         | R552X       | 0.11                    | Additional TOPMED - JHS     |
| PPM1D | 17         | 60663380  | AG                 | A         | K549fs      | 0.14                    | Additional TOPMED - MESA    |
| PPM1D | 17         | 60663376  | A                  | T         | K548X       | 0.13                    | COPDGene                    |
| PPM1D | 17         | 60663365  | G                  | GC        | G544fs      | 0.12                    | Additional TOPMED - ARIC    |
| PPM1D | 17         | 60663352  | GA                 | G         | E540fs      | 0.24                    | Additional TOPMED - ECLIPSE |
| PPM1D | 17         | 60663346  | TTA                | T         | L538fs      | 0.08                    | UK Biobank                  |
| PPM1D | 17         | 60663343  | AC                 | A         | T537fs      | 0.08                    | UK Biobank                  |
| PPM1D | 17         | 60663340  | AG                 | A         | R536fs      | 0.37                    | COPDGene                    |
| PPM1D | 17         | 60663333  | CT                 | C         | F534fs      | 0.17                    | COPDGene                    |
| PPM1D | 17         | 60663333  | C                  | CT        | K535fs      | 0.31                    | UK Biobank                  |
| PPM1D | 17         | 60663333  | C                  | CTT       | N533fs      | 0.45                    | Additional TOPMED - MESA    |
| PPM1D | 17         | 60663333  | C                  | CT        | N533fs      | 0.11                    | COPDGene                    |
| PPM1D | 17         | 60663329  | CA                 | C         | T532fs      | 0.21                    | COPDGene                    |
| PPM1D | 17         | 60663326  | CA                 | C         | P531fs      | 0.17                    | Additional TOPMED - ECLIPSE |
| PPM1D | 17         | 60663324  | TC                 | T         | P531fs      | 0.19                    | Additional TOPMED - MESA    |
| PPM1D | 17         | 60663292  | CA                 | C         | Q520fs      | 0.13                    | Additional TOPMED - ECLIPSE |
| PPM1D | 17         | 60663281  | C                  | A         | S516*       | 0.16                    | UK Biobank                  |
| PPM1D | 17         | 60663269  | AT                 | A         | N512fs      | 0.12                    | COPDGene                    |
| PPM1D | 17         | 60663262  | CA                 | C         | N512fs      | 0.08                    | UK Biobank                  |
| PPM1D | 17         | 60663262  | CA                 | C         | N512fs      | 0.06                    | UK Biobank                  |
| PPM1D | 17         | 60663262  | CA                 | C         | N512fs      | 0.05                    | UK Biobank                  |
| PPM1D | 17         | 60663262  | C                  | CA        | Q510fs      | 0.30                    | Additional TOPMED - ARIC    |
| PPM1D | 17         | 60663253  | G                  | GTC       | V507fs      | 0.08                    | Additional TOPMED - MESA    |
| PPM1D | 17         | 60663185  | T                  | G         | L484*       | 0.30                    | UK Biobank                  |
| PPM1D | 17         | 60663185  | T                  | A         | L484X       | 0.19                    | Additional TOPMED - MESA    |
| PPM1D | 17         | 60663185  | T                  | G         | L484X       | 0.13                    | COPDGene                    |
| PPM1D | 17         | 60663181  | AC                 | A         | T483fs      | 0.38                    | COPDGene                    |
| PPM1D | 17         | 60663168  | C                  | A         | C478X       | 0.81                    | Additional TOPMED - CFS     |
| PPM1D | 17         | 60663151  | CCACTTGA           | A         | P473fs      | 0.20                    | COPDGene                    |
| PPM1D | 17         | 60663122  | G                  | CT        | G463fs      | 0.31                    | COPDGene                    |
| PPM1D | 17         | 60663121  | GGT                | G         | G463fs      | 0.21                    | COPDGene                    |
| PPM1D | 17         | 60663088  | GT                 | G         | V452fs      | 0.18                    | Additional TOPMED - ARIC    |
| PPM1D | 17         | 60663083  | T                  | G         | L450X       | 0.23                    | Additional TOPMED - MESA    |
| PPM1D | 17         | 60663019  | AG                 | A         | R429fs      | 0.26                    | COPDGene                    |
| PPM1D | 17         | 60663014  | G                  | A         | W427X       | 0.17                    | COPDGene                    |
| PPM1D | 17         | 60656804  | TGA                | A         | V408fs      | 0.14                    | COPDGene                    |
| PPM1D | 17         | 60656793  | AGAAACCT           | T         | E405fs      | 0.20                    | COPDGene                    |
| PPM1D | 17         | 58740884  | C                  | T         | Q597*       | 0.19                    | ICGN-EOCPD                  |
| PPM1D | 17         | 58740836  | C                  | T         | R581*       | 0.05                    | ICGN-EOCPD                  |
| PPM1D | 17         | 58740809  | C                  | T         | R572*       | 0.08                    | ICGN-EOCPD                  |

| Gene   | Chromosome | Position  | Reference       | Alternate                      | Consequence             | Variant Allele Fraction | Cohort                      |
|--------|------------|-----------|-----------------|--------------------------------|-------------------------|-------------------------|-----------------------------|
| PPM1D  | 17         | 58740806  | C               | T                              | Q571*                   | 0.07                    | ICGN-EOCOPD                 |
| PPM1D  | 17         | 58740749  | C               | T                              | R552*                   | 0.27                    | ICGN-EOCOPD                 |
| PPM1D  | 17         | 58740749  | C               | T                              | R552*                   | 0.13                    | ICGN-EOCOPD                 |
| PPM1D  | 17         | 58740623  | CA              | C                              | N512fs                  | 0.06                    | ICGN-EOCOPD                 |
| PPM1D  | 17         | 58740517  | TG              | T                              | E475fs                  | 0.10                    | ICGN-EOCOPD                 |
| PPM1D  | 17         | 58740505  | TC              | T                              | P471fs                  | 0.03                    | ICGN-EOCOPD                 |
| PPM1D  | 17         | 58740375  | G               | A                              | W427*                   | 0.23                    | ICGN-EOCOPD                 |
| PRPF8  | 17         | 1660445   | A               | T                              | M1591K                  | 0.06                    | UK Biobank                  |
| PRPF8  | 17         | 1660436   | C               | T                              | C1594Y                  | 0.13                    | UK Biobank                  |
| PRPF8  | 17         | 1660435   | A               | C                              | C1594W                  | 0.22                    | Additional TOPMED - ECLIPSE |
| PRPF8  | 17         | 1660435   | A               | C                              | C1594W                  | 0.13                    | COPDGene                    |
| PRPF8  | 17         | 1659995   | C               | T                              | D1598N                  | 0.40                    | Additional TOPMED - ECLIPSE |
| PRPF8  | 17         | 1659994   | T               | A                              | D1598V                  | 0.33                    | Additional TOPMED - ECLIPSE |
| PTEN   | 10         | 87957918  | C               | T                              | R234W                   | 0.33                    | COPDGene                    |
| PTEN   | 10         | 87933099  | G               | T                              | E114X                   | 0.12                    | Additional TOPMED - ECLIPSE |
| PTPN11 | 12         | 112891153 | A               | A                              | G163S                   | 0.04                    | ICGN-EOCOPD                 |
| PTPN11 | 12         | 112489084 | A               | A                              | G503E                   | 0.12                    | COPDGene                    |
| RAD21  | 8          | 116857372 | ACT             | A                              | E194fs                  | 0.10                    | Additional TOPMED - MESA    |
| RAD21  | 8          | 116856290 | T               | A                              | c.815-2A>T              | 0.20                    | Additional TOPMED - FHS     |
| RAD21  | 8          | 116852549 | C               | G                              | D441H                   | 0.10                    | UK Biobank                  |
| RAD21  | 8          | 116852092 | CTCATCTGCAATTGG | C                              | ce11-4CCAATTGCAGATGAG>G | 0.08                    | UK Biobank                  |
| RUNX1  | 21         | 36231809  | GCT             | G                              | R164fs                  | 0.25                    | ICGN-EOCOPD                 |
| RUNX1  | 21         | 34880569  | G               | A                              | R139X                   | 0.33                    | COPDGene                    |
| RUNX1  | 21         | 34834586  | A               | T                              | L183Q                   | 0.07                    | UK Biobank                  |
| RUNX1  | 21         | 34792610  | G               | A                              | T296M                   | 0.10                    | UK Biobank                  |
| RUNX1  | 21         | 34792321  | C               | CCCCCAGGAGAACAGGGAGGGCCGGCCGAG | G393fs                  | 0.07                    | UK Biobank                  |
| RUNX1  | 21         | 34792310  | C               | GCGCCGGAGT                     | R396H                   | 0.06                    | UK Biobank                  |
| SETBP1 | 18         | 44951954  | G               | A                              | G872R                   | 0.09                    | UK Biobank                  |
| SETBP1 | 18         | 44951931  | C               | T                              | T864M                   | 0.05                    | UK Biobank                  |
| SETBP1 | 18         | 44951912  | G               | A                              | E858K                   | 0.22                    | UK Biobank                  |
| SETD2  | 3          | 47168146  | C               | A                              | E27*                    | 0.08                    | ICGN-EOCOPD                 |
| SETD2  | 3          | 47123438  | G               | A                              | R400*                   | 0.08                    | UK Biobank                  |
| SETD2  | 3          | 47121248  | T               | A                              | K1130*                  | 0.05                    | UK Biobank                  |
| SETD2  | 3          | 47098424  | G               | A                              | Q2284*                  | 0.07                    | ICGN-EOCOPD                 |
| SETDB1 | 1          | 150951078 | G               | GGT                            | G734fs                  | 0.46                    | Additional TOPMED - ECLIPSE |
| SETDB1 | 1          | 150951078 | G               | GGT                            | G734fs                  | 0.26                    | Additional TOPMED - ARIC    |
| SF3B1  | 2          | 198267359 | C               | G                              | K666N                   | 0.19                    | ICGN-EOCOPD                 |
| SF3B1  | 2          | 198266834 | T               | C                              | K700E                   | 0.13                    | ICGN-EOCOPD                 |
| SF3B1  | 2          | 198266611 | C               | T                              | G742D                   | 0.19                    | ICGN-EOCOPD                 |
| SF3B1  | 2          | 197403602 | G               | A                              | R568C                   | 0.09                    | UK Biobank                  |
| SF3B1  | 2          | 197403016 | G               | T                              | P580Q                   | 0.09                    | UK Biobank                  |
| SF3B1  | 2          | 197402774 | A               | T                              | M620K                   | 0.26                    | UK Biobank                  |
| SF3B1  | 2          | 197402767 | C               | G                              | E622D                   | 0.45                    | UK Biobank                  |
| SF3B1  | 2          | 197402765 | T               | C                              | Y623C                   | 0.22                    | UK Biobank                  |
| SF3B1  | 2          | 197402765 | T               | C                              | Y623C                   | 0.07                    | UK Biobank                  |
| SF3B1  | 2          | 197402760 | G               | C                              | R625G                   | 0.34                    | COPDGene                    |
| SF3B1  | 2          | 197402647 | G               | T                              | H662Q                   | 0.14                    | COPDGene                    |
| SF3B1  | 2          | 197402647 | G               | C                              | H662Q                   | 0.12                    | COPDGene                    |
| SF3B1  | 2          | 197402645 | G               | A                              | T663I                   | 0.33                    | COPDGene                    |
| SF3B1  | 2          | 197402645 | G               | A                              | T663I                   | 0.12                    | UK Biobank                  |
| SF3B1  | 2          | 197402645 | G               | A                              | T663I                   | 0.10                    | Additional TOPMED - FHS     |
| SF3B1  | 2          | 197402636 | T               | C                              | K666R                   | 0.31                    | Additional TOPMED - ECLIPSE |
| SF3B1  | 2          | 197402636 | T               | C                              | K666R                   | 0.18                    | Additional TOPMED - ECLIPSE |
| SF3B1  | 2          | 197402636 | T               | C                              | K666R                   | 0.11                    | Additional TOPMED - ECLIPSE |
| SF3B1  | 2          | 197402636 | T               | G                              | K666T                   | 0.17                    | UK Biobank                  |
| SF3B1  | 2          | 197402636 | T               | G                              | K666T                   | 0.14                    | COPDGene                    |
| SF3B1  | 2          | 197402635 | C               | A                              | K666N                   | 0.47                    | COPDGene                    |
| SF3B1  | 2          | 197402635 | C               | G                              | K666N                   | 0.36                    | Additional TOPMED - ARIC    |
| SF3B1  | 2          | 197402635 | C               | G                              | K666N                   | 0.34                    | Additional TOPMED - ARIC    |
| SF3B1  | 2          | 197402635 | C               | G                              | K666N                   | 0.34                    | Additional TOPMED - JHS     |
| SF3B1  | 2          | 197402635 | C               | A                              | K666N                   | 0.31                    | COPDGene                    |
| SF3B1  | 2          | 197402635 | C               | A                              | K666N                   | 0.29                    | COPDGene                    |
| SF3B1  | 2          | 197402635 | C               | A                              | K666N                   | 0.20                    | COPDGene                    |
| SF3B1  | 2          | 197402635 | C               | A                              | K666N                   | 0.18                    | COPDGene                    |
| SF3B1  | 2          | 197402635 | C               | A                              | K666N                   | 0.16                    | COPDGene                    |
| SF3B1  | 2          | 197402635 | C               | A                              | K666N                   | 0.07                    | UK Biobank                  |
| SF3B1  | 2          | 197402110 | T               | C                              | K700E                   | 0.34                    | Additional TOPMED - ARIC    |
| SF3B1  | 2          | 197402110 | T               | C                              | K700E                   | 0.31                    | Additional TOPMED - ECLIPSE |
| SF3B1  | 2          | 197402110 | T               | C                              | K700E                   | 0.19                    | Additional TOPMED - ECLIPSE |
| SF3B1  | 2          | 197402110 | T               | C                              | K700E                   | 0.18                    | Additional TOPMED - ECLIPSE |
| SF3B1  | 2          | 197402110 | T               | C                              | K700E                   | 0.17                    | UK Biobank                  |
| SF3B1  | 2          | 197402110 | T               | C                              | K700E                   | 0.16                    | Additional TOPMED - ECLIPSE |
| SF3B1  | 2          | 197402110 | T               | C                              | K700E                   | 0.14                    | UK Biobank                  |
| SF3B1  | 2          | 197402110 | T               | C                              | K700E                   | 0.14                    | UK Biobank                  |
| SF3B1  | 2          | 197402110 | T               | C                              | K700E                   | 0.13                    | COPDGene                    |
| SF3B1  | 2          | 197402110 | T               | C                              | K700E                   | 0.13                    | UK Biobank                  |
| SF3B1  | 2          | 197402110 | T               | C                              | K700E                   | 0.13                    | Additional TOPMED - JHS     |
| SF3B1  | 2          | 197402110 | T               | C                              | K700E                   | 0.12                    | COPDGene                    |
| SF3B1  | 2          | 197402110 | T               | C                              | K700E                   | 0.11                    | Additional TOPMED - ECLIPSE |
| SF3B1  | 2          | 197402097 | A               | G                              | I704T                   | 0.12                    | UK Biobank                  |
| SF3B1  | 2          | 197402068 | C               | T                              | E714K                   | 0.09                    | UK Biobank                  |
| SF3B1  | 2          | 197402001 | C               | T                              | R736H                   | 0.09                    | UK Biobank                  |
| SF3B1  | 2          | 197401989 | C               | T                              | G740E                   | 0.13                    | COPDGene                    |
| SF3B1  | 2          | 197401887 | C               | T                              | G742D                   | 0.20                    | UK Biobank                  |
| SF3B1  | 2          | 197401497 | C               | T                              | G800D                   | 0.13                    | UK Biobank                  |
| SMC1A  | X          | 53412899  | A               | T                              | ce5-TG>A                | 0.09                    | UK Biobank                  |
| SMC1A  | X          | 53411824  | AT              | A                              | N397fs                  | 0.06                    | UK Biobank                  |
| SMC1A  | X          | 53410078  | T               | TG                             | N1024fs                 | 0.10                    | ICGN-EOCOPD                 |
| SMC1A  | X          | 53405146  | G               | A                              | Q688*                   | 0.04                    | UK Biobank                  |
| SMC1A  | X          | 53382640  | G               | A                              | R1051*                  | 0.04                    | UK Biobank                  |
| SMC3   | 10         | 110602642 | C               | T                              | Q1092*                  | 0.11                    | UK Biobank                  |
| SMC3   | 10         | 110599701 | TA              | T                              | T773fs                  | 0.05                    | UK Biobank                  |
| SRSF2  | 17         | 76736878  | G               | C                              | P95A                    | 0.27                    | UK Biobank                  |
| SRSF2  | 17         | 76736878  | G               | C                              | P95A                    | 0.24                    | COPDGene                    |
| SRSF2  | 17         | 76736878  | G               | A                              | P95S                    | 0.37                    | Additional TOPMED - ARIC    |
| SRSF2  | 17         | 76736878  | G               | T                              | P95T                    | 0.44                    | Additional TOPMED - FHS     |
| SRSF2  | 17         | 76736878  | G               | T                              | P95T                    | 0.21                    | UK Biobank                  |
| SRSF2  | 17         | 76736878  | G               | T                              | P95T                    | 0.21                    | UK Biobank                  |
| SRSF2  | 17         | 76736877  | G               | GGC                            | 94 95insR               | 0.04                    | UK Biobank                  |

| Gene  | Chromosome | Position  | Reference | Alternate | Consequence | Variant Allele Fraction | Cohort                      |
|-------|------------|-----------|-----------|-----------|-------------|-------------------------|-----------------------------|
| SRSF2 | 17         | 76736877  | G         | T         | P95H        | 0.48                    | Additional TOPMED - FHS     |
| SRSF2 | 17         | 76736877  | G         | T         | P95H        | 0.45                    | COPDGene                    |
| SRSF2 | 17         | 76736877  | G         | T         | P95H        | 0.40                    | COPDGene                    |
| SRSF2 | 17         | 76736877  | G         | T         | P95H        | 0.36                    | Additional TOPMED - MESA    |
| SRSF2 | 17         | 76736877  | G         | T         | P95H        | 0.34                    | COPDGene                    |
| SRSF2 | 17         | 76736877  | G         | T         | P95H        | 0.29                    | COPDGene                    |
| SRSF2 | 17         | 76736877  | G         | T         | P95H        | 0.29                    | COPDGene                    |
| SRSF2 | 17         | 76736877  | G         | T         | P95H        | 0.28                    | COPDGene                    |
| SRSF2 | 17         | 76736877  | G         | T         | P95H        | 0.28                    | COPDGene                    |
| SRSF2 | 17         | 76736877  | G         | T         | P95H        | 0.26                    | Additional TOPMED - FHS     |
| SRSF2 | 17         | 76736877  | G         | T         | P95H        | 0.21                    | UK Biobank                  |
| SRSF2 | 17         | 76736877  | G         | T         | P95H        | 0.20                    | COPDGene                    |
| SRSF2 | 17         | 76736877  | G         | T         | P95H        | 0.19                    | COPDGene                    |
| SRSF2 | 17         | 76736877  | G         | T         | P95H        | 0.17                    | UK Biobank                  |
| SRSF2 | 17         | 76736877  | G         | T         | P95H        | 0.17                    | COPDGene                    |
| SRSF2 | 17         | 76736877  | G         | T         | P95H        | 0.14                    | Additional TOPMED - ECLIPSE |
| SRSF2 | 17         | 76736877  | G         | T         | P95H        | 0.14                    | Additional TOPMED - ECLIPSE |
| SRSF2 | 17         | 76736877  | G         | T         | P95H        | 0.11                    | COPDGene                    |
| SRSF2 | 17         | 76736877  | G         | T         | P95H        | 0.10                    | UK Biobank                  |
| SRSF2 | 17         | 76736877  | G         | T         | P95H        | 0.05                    | UK Biobank                  |
| SRSF2 | 17         | 76736877  | G         | A         | P95L        | 0.48                    | UK Biobank                  |
| SRSF2 | 17         | 76736877  | G         | A         | P95L        | 0.46                    | COPDGene                    |
| SRSF2 | 17         | 76736877  | G         | A         | P95L        | 0.21                    | COPDGene                    |
| SRSF2 | 17         | 76736877  | G         | A         | P95L        | 0.14                    | Additional TOPMED - MESA    |
| SRSF2 | 17         | 76736877  | G         | A         | P95L        | 0.11                    | COPDGene                    |
| SRSF2 | 17         | 76736877  | G         | A         | P95L        | 0.11                    | Additional TOPMED - ARIC    |
| SRSF2 | 17         | 76736877  | G         | A         | P95L        | 0.10                    | UK Biobank                  |
| SRSF2 | 17         | 76736877  | G         | A         | P95L        | 0.07                    | UK Biobank                  |
| SRSF2 | 17         | 76736877  | G         | C         | P95R        | 0.41                    | Additional TOPMED - FHS     |
| SRSF2 | 17         | 76736877  | G         | C         | P95R        | 0.34                    | Additional TOPMED - ECLIPSE |
| SRSF2 | 17         | 76736877  | G         | C         | P95R        | 0.32                    | Additional TOPMED - FHS     |
| SRSF2 | 17         | 76736877  | G         | C         | P95R        | 0.29                    | COPDGene                    |
| SRSF2 | 17         | 76736877  | G         | C         | P95R        | 0.29                    | COPDGene                    |
| SRSF2 | 17         | 76736877  | G         | C         | P95R        | 0.27                    | UK Biobank                  |
| SRSF2 | 17         | 76736877  | G         | C         | P95R        | 0.25                    | Additional TOPMED - FHS     |
| SRSF2 | 17         | 76736877  | G         | C         | P95R        | 0.18                    | Additional TOPMED - ARIC    |
| SRSF2 | 17         | 76736877  | G         | C         | P95R        | 0.16                    | COPDGene                    |
| SRSF2 | 17         | 76736877  | G         | C         | P95R        | 0.13                    | COPDGene                    |
| SRSF2 | 17         | 76736877  | G         | C         | P95R        | 0.12                    | COPDGene                    |
| SRSF2 | 17         | 76736877  | G         | C         | P95R        | 0.06                    | UK Biobank                  |
| STAG2 | X          | 124063868 | AC        | A         | Q615fs      | 0.16                    | COPDGene                    |
| STAG2 | X          | 124061769 | A         | T         | c.1535-2A>T | 0.18                    | Additional TOPMED - MESA    |
| STAG2 | X          | 124051395 | G         | A         | c.1196+1G>A | 0.23                    | Additional TOPMED - FHS     |
| STAG2 | X          | 124050293 | G         | A         | W334*       | 0.11                    | UK Biobank                  |
| STAG2 | X          | 124047461 | C         | T         | R259X       | 0.32                    | COPDGene                    |
| STAG2 | X          | 124042567 | A         | G         | c.e7-2A>G   | 0.09                    | UK Biobank                  |
| STAG2 | X          | 124031126 | G         | A         | c.288+1G>A  | 0.15                    | Additional TOPMED - JHS     |
| STAG2 | X          | 124031042 | C         | T         | R69*        | 0.07                    | UK Biobank                  |
| STAG2 | X          | 123220396 | G         | T         |             | 0.06                    | ICGN-EEOCPD                 |
| SUZ12 | 17         | 31993250  | G         | T         | E404X       | 0.28                    | Additional TOPMED - JHS     |
| TET2  | 4          | 106197338 | A         | G         | R1891G      | 0.12                    | ICGN-EEOCPD                 |
| TET2  | 4          | 106196306 | C         | T         | Q1547*      | 0.07                    | ICGN-EEOCPD                 |
| TET2  | 4          | 106193977 | C         | A         | S1480Y      | 0.06                    | ICGN-EEOCPD                 |
| TET2  | 4          | 106193723 | A         | ATG       | T1397fs     | 0.18                    | ICGN-EEOCPD                 |
| TET2  | 4          | 106190850 | C         | CT        | C1378fs     | 0.29                    | ICGN-EEOCPD                 |
| TET2  | 4          | 106182962 | C         | A         | A1334E      | 0.05                    | ICGN-EEOCPD                 |
| TET2  | 4          | 106182930 | GTC       | G         | H1325fs     | 0.12                    | ICGN-EEOCPD                 |
| TET2  | 4          | 106180810 | AC        | A         | C1281fs     | 0.05                    | ICGN-EEOCPD                 |
| TET2  | 4          | 106180775 | G         | A         |             | 0.07                    | ICGN-EEOCPD                 |
| TET2  | 4          | 106164920 | G         | A         | C1263Y      | 0.14                    | ICGN-EEOCPD                 |
| TET2  | 4          | 106164861 | ACT       | A         | Y1245fs     | 0.16                    | ICGN-EEOCPD                 |
| TET2  | 4          | 106164734 | G         | A         | R1201H      | 0.07                    | ICGN-EEOCPD                 |
| TET2  | 4          | 106164082 | TG        | T         | V1199fs     | 0.06                    | ICGN-EEOCPD                 |
| TET2  | 4          | 106164003 | G         | T         | K1171N      | 0.04                    | ICGN-EEOCPD                 |
| TET2  | 4          | 106158275 | C         | G         | S1059*      | 0.07                    | ICGN-EEOCPD                 |
| TET2  | 4          | 106157624 | C         | A         | S842*       | 0.07                    | ICGN-EEOCPD                 |
| TET2  | 4          | 106157059 | CA        | C         | K655fs      | 0.04                    | ICGN-EEOCPD                 |
| TET2  | 4          | 106157059 | CA        | C         | K655fs      | 0.03                    | ICGN-EEOCPD                 |
| TET2  | 4          | 106156869 | TC        | T         | Q591fs      | 0.12                    | ICGN-EEOCPD                 |
| TET2  | 4          | 106156570 | C         | T         | Q491*       | 0.24                    | ICGN-EEOCPD                 |
| TET2  | 4          | 105276482 | T         | C         | F1991S      | 0.08                    | UK Biobank                  |
| TET2  | 4          | 105276348 | C         | CA        | V1949fs     | 0.41                    | UK Biobank                  |
| TET2  | 4          | 105276347 | G         | C         | G1946A      | 0.37                    | UK Biobank                  |
| TET2  | 4          | 105276336 | GA        | G         | K1943fs     | 0.53                    | UK Biobank                  |
| TET2  | 4          | 105276302 | A         | G         | E1931G      | 0.03                    | UK Biobank                  |
| TET2  | 4          | 105276284 | C         | A         | A1925D      | 0.04                    | UK Biobank                  |
| TET2  | 4          | 105276281 | A         | C         | K1924T      | 0.06                    | UK Biobank                  |
| TET2  | 4          | 105276274 | G         | C         | A1922P      | 0.14                    | UK Biobank                  |
| TET2  | 4          | 105276244 | C         | C         | H1912D      | 0.13                    | Additional TOPMED - ECLIPSE |
| TET2  | 4          | 105276244 | C         | T         | H1912Y      | 0.30                    | Additional TOPMED - ECLIPSE |
| TET2  | 4          | 105276223 | A         | G         | K1905E      | 0.11                    | UK Biobank                  |
| TET2  | 4          | 105276221 | A         | G         | H1904R      | 0.23                    | UK Biobank                  |
| TET2  | 4          | 105276221 | A         | G         | H1904R      | 0.14                    | Additional TOPMED - FHS     |
| TET2  | 4          | 105276218 | A         | C         | Q1903P      | 0.08                    | UK Biobank                  |
| TET2  | 4          | 105276217 | C         | T         | Q1903*      | 0.11                    | UK Biobank                  |
| TET2  | 4          | 105276205 | C         | A         | L1899I      | 0.03                    | UK Biobank                  |
| TET2  | 4          | 105276203 | C         | G         | S1898C      | 0.08                    | UK Biobank                  |
| TET2  | 4          | 105276203 | C         | T         | S1898F      | 0.37                    | Additional TOPMED - ARIC    |
| TET2  | 4          | 105276191 | C         | A         | P1894H      | 0.39                    | COPDGene                    |
| TET2  | 4          | 105276191 | C         | G         | P1894R      | 0.50                    | COPDGene                    |
| TET2  | 4          | 105276162 | C         | CGTTG     | P1885fs     | 0.08                    | UK Biobank                  |
| TET2  | 4          | 105276160 | A         | G         | T1884A      | 0.24                    | UK Biobank                  |
| TET2  | 4          | 105276160 | A         | G         | T1884A      | 0.03                    | UK Biobank                  |
| TET2  | 4          | 105276155 | C         | T         | A1882V      | 0.18                    | UK Biobank                  |
| TET2  | 4          | 105276152 | A         | C         | H1881P      | 0.02                    | UK Biobank                  |
| TET2  | 4          | 105276151 | C         | T         | H1881Y      | 0.20                    | UK Biobank                  |
| TET2  | 4          | 105276145 | G         | A         | E1879K      | 0.12                    | UK Biobank                  |
| TET2  | 4          | 105276136 | G         | A         | A1876T      | 0.23                    | UK Biobank                  |
| TET2  | 4          | 105276135 | T         | A         | C1875*      | 0.04                    | UK Biobank                  |

| Gene | Chromosome | Position  | Reference                    | Alternate | Consequence | Variant Allele Fraction | Cohort                      |
|------|------------|-----------|------------------------------|-----------|-------------|-------------------------|-----------------------------|
| TET2 | 4          | 105276128 | T                            | G         | I1873S      | 0.35                    | COPDGene                    |
| TET2 | 4          | 105276128 | T                            | C         | I1873T      | 0.20                    | Additional TOPMED - ECLIPSE |
| TET2 | 4          | 105276128 | T                            | C         | I1873T      | 0.16                    | UK Biobank                  |
| TET2 | 4          | 105276128 | T                            | C         | I1873T      | 0.13                    | UK Biobank                  |
| TET2 | 4          | 105276128 | T                            | C         | I1873T      | 0.09                    | UK Biobank                  |
| TET2 | 4          | 105276128 | T                            | C         | I1873T      | 0.08                    | UK Biobank                  |
| TET2 | 4          | 105276128 | T                            | C         | I1873T      | 0.06                    | UK Biobank                  |
| TET2 | 4          | 105276128 | T                            | C         | I1873T      | 0.03                    | UK Biobank                  |
| TET2 | 4          | 105276126 | CATTG                        | C         | I1873fs     | 0.04                    | UK Biobank                  |
| TET2 | 4          | 105276126 | C                            | CA        | L1872fs     | 0.14                    | Additional TOPMED - JHS     |
| TET2 | 4          | 105276112 | C                            | T         | H1868Y      | 0.15                    | UK Biobank                  |
| TET2 | 4          | 105276112 | C                            | T         | H1868Y      | 0.13                    | UK Biobank                  |
| TET2 | 4          | 105276098 | C                            | T         | A1863V      | 0.36                    | Additional TOPMED - ARIC    |
| TET2 | 4          | 105276092 | G                            | A         | G1861E      | 0.07                    | UK Biobank                  |
| TET2 | 4          | 105276092 | G                            | T         | G1861V      | 0.20                    | Additional TOPMED - MESA    |
| TET2 | 4          | 105276091 | G                            | A         | G1861R      | 0.18                    | UK Biobank                  |
| TET2 | 4          | 105276085 | AT                           | A         | I1859fs     | 0.22                    | COPDGene                    |
| TET2 | 4          | 105276084 | CA                           | C         | I1859fs     | 0.37                    | COPDGene                    |
| TET2 | 4          | 105276053 | C                            | G         | S1848*      | 0.04                    | UK Biobank                  |
| TET2 | 4          | 105276053 | C                            | G         | S1848*      | 0.04                    | UK Biobank                  |
| TET2 | 4          | 105276053 | C                            | CA        | S1848fs     | 0.09                    | Additional TOPMED - JHS     |
| TET2 | 4          | 105276051 | G                            | A         | W1847*      | 0.08                    | UK Biobank                  |
| TET2 | 4          | 105276050 | G                            | A         | W1847*      | 0.07                    | UK Biobank                  |
| TET2 | 4          | 105276050 | G                            | A         | W1847*      | 0.05                    | UK Biobank                  |
| TET2 | 4          | 105276050 | G                            | A         | W1847X      | 0.14                    | Additional TOPMED - MESA    |
| TET2 | 4          | 105276037 | ACCGATGAG                    | A         | N1843fs     | 0.11                    | Additional TOPMED - FHS     |
| TET2 | 4          | 105276031 | G                            | T         | E1841X      | 0.25                    | COPDGene                    |
| TET2 | 4          | 105276011 | AG                           | A         | Q1834fs     | 0.22                    | COPDGene                    |
| TET2 | 4          | 105276010 | C                            | T         | Q1834X      | 0.21                    | COPDGene                    |
| TET2 | 4          | 105276010 | C                            | T         | Q1834X      | 0.15                    | Additional TOPMED - JHS     |
| TET2 | 4          | 105275992 | C                            | T         | Q1828*      | 0.29                    | UK Biobank                  |
| TET2 | 4          | 105275983 | C                            | T         | Q1825*      | 0.08                    | UK Biobank                  |
| TET2 | 4          | 105275983 | C                            | T         | Q1825*      | 0.08                    | UK Biobank                  |
| TET2 | 4          | 105275957 | TACACAATTAAGTGATGCTA         | T         | L1816fs     | 0.10                    | COPDGene                    |
| TET2 | 4          | 105275872 | GA                           | G         | D1788fs     | 0.12                    | COPDGene                    |
| TET2 | 4          | 105275857 | CA                           | C         | Q1783fs     | 0.23                    | COPDGene                    |
| TET2 | 4          | 105275808 | CA                           | C         | S1767fs     | 0.25                    | COPDGene                    |
| TET2 | 4          | 105275808 | C                            | G         | Y1766X      | 0.13                    | Additional TOPMED - FHS     |
| TET2 | 4          | 105275786 | CT                           | C         | S1760fs     | 0.08                    | UK Biobank                  |
| TET2 | 4          | 105275763 | TA                           | T         | N1753fs     | 0.05                    | UK Biobank                  |
| TET2 | 4          | 105275637 | T                            | A         | C1709*      | 0.11                    | UK Biobank                  |
| TET2 | 4          | 105275598 | TG                           | T         | G1697fs     | 0.16                    | UK Biobank                  |
| TET2 | 4          | 105275569 | C                            | T         | Q1687*      | 0.08                    | UK Biobank                  |
| TET2 | 4          | 105275569 | C                            | T         | Q1687X      | 0.27                    | COPDGene                    |
| TET2 | 4          | 105275569 | C                            | T         | Q1687X      | 0.21                    | COPDGene                    |
| TET2 | 4          | 105275564 | ATAGCCAGAGTT                 | A         | N1685fs     | 0.14                    | Additional TOPMED - ARIC    |
| TET2 | 4          | 105275522 | G                            | GTC       | S1671fs     | 0.21                    | Additional TOPMED - MESA    |
| TET2 | 4          | 105275459 | CT                           | C         | S1650fs     | 0.13                    | Additional TOPMED - MESA    |
| TET2 | 4          | 105275457 | T                            | G         | Y1649*      | 0.07                    | UK Biobank                  |
| TET2 | 4          | 105275423 | C                            | G         | S1638*      | 0.07                    | UK Biobank                  |
| TET2 | 4          | 105275399 | CA                           | C         | Y1631fs     | 0.20                    | UK Biobank                  |
| TET2 | 4          | 105275387 | CCCAATAT                     | C         | T1626fs     | 0.11                    | Additional TOPMED - FHS     |
| TET2 | 4          | 105275380 | C                            | T         | Q1624*      | 0.13                    | UK Biobank                  |
| TET2 | 4          | 105275305 | TC                           | T         | S1599fs     | 0.28                    | COPDGene                    |
| TET2 | 4          | 105275270 | AT                           | A         | D1587fs     | 0.07                    | UK Biobank                  |
| TET2 | 4          | 105275270 | A                            | AT        | I1588fs     | 0.12                    | UK Biobank                  |
| TET2 | 4          | 105275173 | G                            | GA        | E1555fs     | 0.15                    | Additional TOPMED - MESA    |
| TET2 | 4          | 105275171 | C                            | CA        | T1554fs     | 0.42                    | COPDGene                    |
| TET2 | 4          | 105275167 | C                            | CA        | T1554fs     | 0.06                    | UK Biobank                  |
| TET2 | 4          | 105275095 | C                            | T         | Q1529*      | 0.09                    | UK Biobank                  |
| TET2 | 4          | 105275086 | C                            | T         | Q1526*      | 0.10                    | UK Biobank                  |
| TET2 | 4          | 105275086 | C                            | T         | Q1526X      | 0.12                    | COPDGene                    |
| TET2 | 4          | 105275075 | T                            | TG        | Q1523fs     | 0.09                    | UK Biobank                  |
| TET2 | 4          | 105275064 | AG                           | A         | G1519fs     | 0.13                    | COPDGene                    |
| TET2 | 4          | 105275056 | C                            | T         | R1516*      | 0.15                    | UK Biobank                  |
| TET2 | 4          | 105275056 | C                            | T         | R1516X      | 0.21                    | Additional TOPMED - MESA    |
| TET2 | 4          | 105275056 | C                            | T         | R1516X      | 0.18                    | Additional TOPMED - ARIC    |
| TET2 | 4          | 105272919 | G                            | A         | c.4537+1G>A | 0.11                    | COPDGene                    |
| TET2 | 4          | 105272909 | C                            | T         | Q1510X      | 0.39                    | Additional TOPMED - MESA    |
| TET2 | 4          | 105272871 | G                            | A         | S1497*      | 0.07                    | UK Biobank                  |
| TET2 | 4          | 105272855 | GA                           | G         | K1493fs     | 0.15                    | UK Biobank                  |
| TET2 | 4          | 105272825 | CT                           | C         | L1482fs     | 0.17                    | UK Biobank                  |
| TET2 | 4          | 105272798 | A                            | AT        | K1473fs     | 0.12                    | UK Biobank                  |
| TET2 | 4          | 105272774 | C                            | T         | R1465*      | 0.37                    | UK Biobank                  |
| TET2 | 4          | 105272774 | C                            | T         | R1465*      | 0.23                    | UK Biobank                  |
| TET2 | 4          | 105272774 | C                            | T         | R1465*      | 0.14                    | UK Biobank                  |
| TET2 | 4          | 105272774 | C                            | T         | R1465*      | 0.04                    | UK Biobank                  |
| TET2 | 4          | 105272741 | G                            | GTA       | V1454fs     | 0.26                    | COPDGene                    |
| TET2 | 4          | 105272738 | A                            | T         | K1453X      | 0.12                    | Additional TOPMED - JHS     |
| TET2 | 4          | 105272735 | C                            | T         | R1452*      | 0.07                    | UK Biobank                  |
| TET2 | 4          | 105272735 | C                            | T         | R1452*      | 0.04                    | UK Biobank                  |
| TET2 | 4          | 105272735 | C                            | T         | R1452X      | 0.48                    | Additional TOPMED - ECLIPSE |
| TET2 | 4          | 105272714 | C                            | T         | Q1445X      | 0.11                    | Additional TOPMED - ECLIPSE |
| TET2 | 4          | 105272692 | G                            | GA        | E1437fs     | 0.33                    | COPDGene                    |
| TET2 | 4          | 105272692 | G                            | GA        | R1440fs     | 0.43                    | UK Biobank                  |
| TET2 | 4          | 105272692 | G                            | GA        | R1440fs     | 0.21                    | UK Biobank                  |
| TET2 | 4          | 105272674 | TGTGGAAGCTCAGGAGGAGAAAAACCGA | T         | V1432fs     | 0.54                    | Additional TOPMED - FHS     |
| TET2 | 4          | 105272652 | CT                           | C         | S1424fs     | 0.10                    | COPDGene                    |
| TET2 | 4          | 105272644 | CAA                          | C         | K1422fs     | 0.43                    | UK Biobank                  |
| TET2 | 4          | 105272637 | CT                           | C         | P1419fs     | 0.30                    | COPDGene                    |
| TET2 | 4          | 105272621 | C                            | T         | Q1414*      | 0.04                    | UK Biobank                  |
| TET2 | 4          | 105272603 | G                            | T         | G1408*      | 0.18                    | UK Biobank                  |
| TET2 | 4          | 105272591 | C                            | T         | R1404*      | 0.15                    | UK Biobank                  |
| TET2 | 4          | 105272574 | T                            | C         | L1398P      | 0.34                    | Additional TOPMED - JHS     |
| TET2 | 4          | 105272571 | C                            | A         | T1397N      | 0.10                    | UK Biobank                  |
| TET2 | 4          | 105272563 | G                            | A         | c.4183-1G>A | 0.17                    | Additional TOPMED - FHS     |
| TET2 | 4          | 105272562 | AG                           | A         | c.e10-2AG>A | 0.25                    | UK Biobank                  |
| TET2 | 4          | 105272562 | AG                           | A         | c.e10-2AG>A | 0.09                    | UK Biobank                  |
| TET2 | 4          | 105269748 | G                            | GT        | c.e9+1G>GT  | 0.08                    | UK Biobank                  |

| Gene | Chromosome | Position  | Reference | Alternate | Consequence | Variant Allele Fraction | Cohort                      |
|------|------------|-----------|-----------|-----------|-------------|-------------------------|-----------------------------|
| TET2 | 4          | 105269741 | C         | A         | S1392R      | 0.08                    | UK Biobank                  |
| TET2 | 4          | 105269715 | G         | A         | D1384N      | 0.06                    | UK Biobank                  |
| TET2 | 4          | 105269710 | A         | C         | H1382P      | 0.12                    | Additional TOPMED - ARIC    |
| TET2 | 4          | 105269710 | A         | G         | H1382R      | 0.27                    | UK Biobank                  |
| TET2 | 4          | 105269710 | A         | G         | H1382R      | 0.04                    | UK Biobank                  |
| TET2 | 4          | 105269708 | CCA       | C         | H1382fs     | 0.23                    | COPDGene                    |
| TET2 | 4          | 105269703 | C         | G         | H1380D      | 0.20                    | COPDGene                    |
| TET2 | 4          | 105269703 | C         | C         | H1380Y      | 0.09                    | COPDGene                    |
| TET2 | 4          | 105269699 | T         | TGC       | C1378fs     | 0.08                    | COPDGene                    |
| TET2 | 4          | 105269698 | G         | A         | C1378Y      | 0.09                    | UK Biobank                  |
| TET2 | 4          | 105269686 | G         | A         | C1374Y      | 0.28                    | UK Biobank                  |
| TET2 | 4          | 105269673 | G         | T         | G1370W      | 0.32                    | UK Biobank                  |
| TET2 | 4          | 105269671 | C         | T         | S1369L      | 0.06                    | UK Biobank                  |
| TET2 | 4          | 105269671 | C         | A         | S1369X      | 0.14                    | COPDGene                    |
| TET2 | 4          | 105269669 | C         | G         | F1368L      | 0.23                    | Additional TOPMED - ECLIPSE |
| TET2 | 4          | 105269666 | AT        | A         | F1368fs     | 0.45                    | Additional TOPMED - FHS     |
| TET2 | 4          | 105269662 | G         | A         | R1366H      | 0.25                    | UK Biobank                  |
| TET2 | 4          | 105269662 | G         | A         | R1366H      | 0.21                    | UK Biobank                  |
| TET2 | 4          | 105269662 | G         | A         | R1366H      | 0.10                    | UK Biobank                  |
| TET2 | 4          | 105269662 | G         | C         | R1366P      | 0.12                    | UK Biobank                  |
| TET2 | 4          | 105269661 | C         | A         | R1366S      | 0.06                    | UK Biobank                  |
| TET2 | 4          | 105269646 | G         | A         | G1361S      | 0.20                    | UK Biobank                  |
| TET2 | 4          | 105269644 | T         | G         | L1360R      | 0.19                    | Additional TOPMED - MESA    |
| TET2 | 4          | 105269640 | C         | T         | R1359C      | 0.41                    | COPDGene                    |
| TET2 | 4          | 105269640 | C         | T         | R1359C      | 0.13                    | UK Biobank                  |
| TET2 | 4          | 105269640 | C         | A         | R1359S      | 0.09                    | UK Biobank                  |
| TET2 | 4          | 105269638 | G         | A         | C1358Y      | 0.09                    | UK Biobank                  |
| TET2 | 4          | 105269624 | CAG       | C         | R1354fs     | 0.31                    | Additional TOPMED - ECLIPSE |
| TET2 | 4          | 105269624 | CAG       | C         | R1354fs     | 0.27                    | Additional TOPMED - JHS     |
| TET2 | 4          | 105269624 | CAG       | C         | R1354fs     | 0.06                    | Additional TOPMED - FHS     |
| TET2 | 4          | 105269615 | AT        | A         | Y1351fs     | 0.05                    | UK Biobank                  |
| TET2 | 4          | 105269609 | G         | A         | c.4045-1G>A | 0.32                    | Additional TOPMED - MESA    |
| TET2 | 4          | 105269609 | G         | T         | c.4045-1G>T | 0.12                    | Additional TOPMED - JHS     |
| TET2 | 4          | 105261849 | G         | A         | c.e8+1G>A   | 0.20                    | UK Biobank                  |
| TET2 | 4          | 105261847 | A         | G         | Q1348R      | 0.22                    | Additional TOPMED - FHS     |
| TET2 | 4          | 105261824 | T         | TG        | L1340fs     | 0.16                    | COPDGene                    |
| TET2 | 4          | 105261808 | CA        | C         | P1335fs     | 0.51                    | Additional TOPMED - JHS     |
| TET2 | 4          | 105261790 | T         | C         | L1329P      | 0.13                    | COPDGene                    |
| TET2 | 4          | 105261790 | T         | A         | L1329Q      | 0.29                    | COPDGene                    |
| TET2 | 4          | 105261764 | GA        | G         | K1321fs     | 0.22                    | COPDGene                    |
| TET2 | 4          | 105259739 | G         | GT        | K1310fs     | 0.12                    | UK Biobank                  |
| TET2 | 4          | 105259734 | AG        | A         | R1307fs     | 0.14                    | COPDGene                    |
| TET2 | 4          | 105259734 | A         | G         | R1307G      | 0.09                    | UK Biobank                  |
| TET2 | 4          | 105259715 | T         | G         | F1300L      | 0.10                    | UK Biobank                  |
| TET2 | 4          | 105259714 | T         | G         | F1300C      | 0.11                    | UK Biobank                  |
| TET2 | 4          | 105259708 | G         | GT        | C1298fs     | 0.11                    | Additional TOPMED - JHS     |
| TET2 | 4          | 105259708 | G         | A         | C1298Y      | 0.13                    | Additional TOPMED - JHS     |
| TET2 | 4          | 105259708 | G         | A         | C1298Y      | 0.12                    | COPDGene                    |
| TET2 | 4          | 105259705 | G         | A         | G1297E      | 0.20                    | COPDGene                    |
| TET2 | 4          | 105259696 | A         | G         | Y1294C      | 0.18                    | Additional TOPMED - ECLIPSE |
| TET2 | 4          | 105259694 | G         | GT        | Y1294fs     | 0.10                    | UK Biobank                  |
| TET2 | 4          | 105259687 | G         | A         | W1291*      | 0.06                    | UK Biobank                  |
| TET2 | 4          | 105259684 | C         | T         | S1290L      | 0.16                    | Additional TOPMED - MESA    |
| TET2 | 4          | 105259681 | G         | T         | C1289F      | 0.06                    | UK Biobank                  |
| TET2 | 4          | 105259675 | T         | C         | F1287S      | 0.24                    | UK Biobank                  |
| TET2 | 4          | 105259675 | T         | C         | F1287S      | 0.08                    | UK Biobank                  |
| TET2 | 4          | 105259675 | T         | C         | F1287S      | 0.05                    | UK Biobank                  |
| TET2 | 4          | 105259672 | C         | CTT       | G1288fs     | 0.11                    | UK Biobank                  |
| TET2 | 4          | 105259639 | G         | A         | G1275E      | 0.12                    | UK Biobank                  |
| TET2 | 4          | 105259628 | C         | G         | C1271W      | 0.34                    | COPDGene                    |
| TET2 | 4          | 105259626 | T         | TG        | C1271fs     | 0.11                    | COPDGene                    |
| TET2 | 4          | 105259625 | T         | TTG       | T1270fs     | 0.10                    | Additional TOPMED - FHS     |
| TET2 | 4          | 105243757 | G         | A         | R1261H      | 0.10                    | UK Biobank                  |
| TET2 | 4          | 105243756 | C         | T         | R1261C      | 0.35                    | COPDGene                    |
| TET2 | 4          | 105243756 | C         | T         | R1261C      | 0.34                    | COPDGene                    |
| TET2 | 4          | 105243756 | C         | T         | R1261C      | 0.20                    | COPDGene                    |
| TET2 | 4          | 105243756 | C         | T         | R1261C      | 0.17                    | UK Biobank                  |
| TET2 | 4          | 105243756 | C         | T         | R1261C      | 0.11                    | UK Biobank                  |
| TET2 | 4          | 105243756 | C         | T         | R1261C      | 0.08                    | UK Biobank                  |
| TET2 | 4          | 105243756 | C         | A         | R1261S      | 0.15                    | Additional TOPMED - JHS     |
| TET2 | 4          | 105243740 | C         | A         | Y1255*      | 0.06                    | UK Biobank                  |
| TET2 | 4          | 105243718 | T         | G         | L1248R      | 0.29                    | COPDGene                    |
| TET2 | 4          | 105243709 | ACTCGGAG  | A         | S1246fs     | 0.40                    | UK Biobank                  |
| TET2 | 4          | 105243706 | T         | C         | L1244P      | 0.13                    | Additional TOPMED - FHS     |
| TET2 | 4          | 105243704 | ACT       | A         | Y1245fs     | 0.15                    | UK Biobank                  |
| TET2 | 4          | 105243704 | ACT       | A         | Y1245fs     | 0.05                    | UK Biobank                  |
| TET2 | 4          | 105243690 | TC        | T         | S1239fs     | 0.24                    | Additional TOPMED - ARIC    |
| TET2 | 4          | 105243664 | T         | TC        | I1230fs     | 0.29                    | COPDGene                    |
| TET2 | 4          | 105243646 | C         | G         | A1224G      | 0.03                    | UK Biobank                  |
| TET2 | 4          | 105243631 | A         | C         | H1219P      | 0.05                    | UK Biobank                  |
| TET2 | 4          | 105243622 | G         | A         | R1216Q      | 0.22                    | COPDGene                    |
| TET2 | 4          | 105243621 | C         | T         | R1216*      | 0.07                    | UK Biobank                  |
| TET2 | 4          | 105243621 | C         | T         | R1216*      | 0.06                    | UK Biobank                  |
| TET2 | 4          | 105243621 | C         | T         | R1216*      | 0.05                    | UK Biobank                  |
| TET2 | 4          | 105243621 | C         | T         | R1216*      | 0.04                    | UK Biobank                  |
| TET2 | 4          | 105243621 | C         | T         | R1216X      | 0.43                    | COPDGene                    |
| TET2 | 4          | 105243621 | C         | T         | R1216X      | 0.39                    | Additional TOPMED - FHS     |
| TET2 | 4          | 105243616 | G         | A         | R1214Q      | 0.12                    | UK Biobank                  |
| TET2 | 4          | 105243616 | G         | A         | R1214Q      | 0.04                    | UK Biobank                  |
| TET2 | 4          | 105243615 | C         | T         | R1214W      | 0.08                    | UK Biobank                  |
| TET2 | 4          | 105243615 | C         | T         | R1214W      | 0.05                    | UK Biobank                  |
| TET2 | 4          | 105243615 | C         | T         | R1214W      | 0.05                    | UK Biobank                  |
| TET2 | 4          | 105243612 | G         | A         | V1213M      | 0.30                    | Additional TOPMED - ECLIPSE |
| TET2 | 4          | 105243612 | G         | A         | V1213M      | 0.09                    | UK Biobank                  |
| TET2 | 4          | 105243610 | T         | C         | L1212S      | 0.07                    | UK Biobank                  |
| TET2 | 4          | 105243607 | G         | A         | C1211Y      | 0.36                    | COPDGene                    |
| TET2 | 4          | 105243601 | T         | C         | L1209P      | 0.24                    | COPDGene                    |
| TET2 | 4          | 105243597 | A         | T         | K1208*      | 0.11                    | UK Biobank                  |
| TET2 | 4          | 105243587 | C         | A         | S1204R      | 0.05                    | UK Biobank                  |



| Gene | Chromosome | Position  | Reference             | Alternate | Consequence | Variant Allele Fraction | Cohort                      |
|------|------------|-----------|-----------------------|-----------|-------------|-------------------------|-----------------------------|
| TET2 | 4          | 105243569 | G                     | T         | c.e6-1G>T   | 0.12                    | UK Biobank                  |
| TET2 | 4          | 105242929 | T                     | C         | c.3594+2T>C | 0.16                    | COPDGene                    |
| TET2 | 4          | 105242920 | C                     | CT        | K1197fs     | 0.29                    | UK Biobank                  |
| TET2 | 4          | 105242914 | C                     | G         | P1194R      | 0.24                    | UK Biobank                  |
| TET2 | 4          | 105242912 | TC                    | T         | P1194fs     | 0.16                    | Additional TOPMED - FHS     |
| TET2 | 4          | 105242904 | C                     | T         | Q1191X      | 0.13                    | COPDGene                    |
| TET2 | 4          | 105241429 | G                     | A         | R1167K      | 0.33                    | UK Biobank                  |
| TET2 | 4          | 105241421 | G                     | A         | M1164I      | 0.13                    | COPDGene                    |
| TET2 | 4          | 105241402 | C                     | T         | A1158V      | 0.07                    | UK Biobank                  |
| TET2 | 4          | 105241389 | G                     | A         | G1154S      | 0.16                    | Additional TOPMED - FHS     |
| TET2 | 4          | 105241372 | A                     | G         | Y1148C      | 0.21                    | Additional TOPMED - FHS     |
| TET2 | 4          | 105241338 | G                     | A         | c.3410-1G>A | 0.12                    | Additional TOPMED - JHS     |
| TET2 | 4          | 105241320 | TCTTCTATTATCTCAACAGAG | T         | E1137fs     | 0.11                    | COPDGene                    |
| TET2 | 4          | 105237352 | G                     | C         | c.e3+1G>C   | 0.06                    | UK Biobank                  |
| TET2 | 4          | 105237352 | G                     | GT        | c.e3+1G>GT  | 0.41                    | UK Biobank                  |
| TET2 | 4          | 105237351 | G                     | A         | E1137K      | 0.21                    | COPDGene                    |
| TET2 | 4          | 105237349 | TAG                   | T         | V1136fs     | 0.20                    | Additional TOPMED - ARIC    |
| TET2 | 4          | 105237347 | T                     | G         | C1135W      | 0.15                    | Additional TOPMED - MESA    |
| TET2 | 4          | 105237346 | GT                    | G         | C1135fs     | 0.20                    | UK Biobank                  |
| TET2 | 4          | 105237346 | G                     | A         | C1135Y      | 0.20                    | UK Biobank                  |
| TET2 | 4          | 105237325 | A                     | ATT       | Y1128fs     | 0.09                    | Additional TOPMED - MESA    |
| TET2 | 4          | 105237305 | T                     | TA        | D1121fs     | 0.32                    | Additional TOPMED - ECLIPSE |
| TET2 | 4          | 105237297 | T                     | A         | L1119I      | 0.08                    | UK Biobank                  |
| TET2 | 4          | 105237289 | TA                    | T         | N1118fs     | 0.13                    | UK Biobank                  |
| TET2 | 4          | 105237281 | T                     | TA        | D1113fs     | 0.11                    | COPDGene                    |
| TET2 | 4          | 105237274 | T                     | A         | L1111*      | 0.14                    | UK Biobank                  |
| TET2 | 4          | 105237253 | TTATA                 | T         | F1104fs     | 0.08                    | UK Biobank                  |
| TET2 | 4          | 105237249 | AATTT                 | A         | N1103fs     | 0.21                    | UK Biobank                  |
| TET2 | 4          | 105237226 | GAA                   | G         | R1095fs     | 0.15                    | COPDGene                    |
| TET2 | 4          | 105237204 | T                     | TC        | E1089fs     | 0.04                    | UK Biobank                  |
| TET2 | 4          | 105237157 | C                     | CA        | A1072fs     | 0.29                    | Additional TOPMED - MESA    |
| TET2 | 4          | 105237144 | C                     | T         | Q1068*      | 0.17                    | UK Biobank                  |
| TET2 | 4          | 105237127 | TCA                   | T         | V1062fs     | 0.31                    | COPDGene                    |
| TET2 | 4          | 105237099 | C                     | T         | Q1053X      | 0.44                    | Additional TOPMED - FHS     |
| TET2 | 4          | 105237093 | C                     | T         | Q1051*      | 0.26                    | UK Biobank                  |
| TET2 | 4          | 105237093 | C                     | T         | Q1051X      | 0.14                    | COPDGene                    |
| TET2 | 4          | 105237080 | T                     | TA        | T1047fs     | 0.33                    | UK Biobank                  |
| TET2 | 4          | 105237044 | GT                    | G         | H1036fs     | 0.09                    | UK Biobank                  |
| TET2 | 4          | 105237044 | G                     | GT        | Q1034fs     | 0.53                    | COPDGene                    |
| TET2 | 4          | 105237030 | C                     | T         | Q1030X      | 0.35                    | Additional TOPMED - JHS     |
| TET2 | 4          | 105237027 | G                     | T         | E1029*      | 0.09                    | UK Biobank                  |
| TET2 | 4          | 105237000 | C                     | T         | Q1020X      | 0.11                    | COPDGene                    |
| TET2 | 4          | 105236989 | GT                    | G         | C1016fs     | 0.07                    | COPDGene                    |
| TET2 | 4          | 105236983 | C                     | CA        | A1014fs     | 0.31                    | Additional TOPMED - JHS     |
| TET2 | 4          | 105236961 | A                     | AT        | T1007fs     | 0.14                    | UK Biobank                  |
| TET2 | 4          | 105236958 | GTAAC                 | G         | V1006fs     | 0.19                    | Additional TOPMED - MESA    |
| TET2 | 4          | 105236951 | GA                    | G         | K1004fs     | 0.34                    | Additional TOPMED - MESA    |
| TET2 | 4          | 105236951 | GA                    | G         | K1005fs     | 0.06                    | UK Biobank                  |
| TET2 | 4          | 105236951 | GA                    | G         | K1005fs     | 0.05                    | UK Biobank                  |
| TET2 | 4          | 105236921 | GC                    | G         | H994fs      | 0.05                    | UK Biobank                  |
| TET2 | 4          | 105236879 | GC                    | G         | P980fs      | 0.11                    | Additional TOPMED - ECLIPSE |
| TET2 | 4          | 105236877 | AG                    | A         | R979fs      | 0.20                    | COPDGene                    |
| TET2 | 4          | 105236861 | C                     | A         | C973*       | 0.05                    | UK Biobank                  |
| TET2 | 4          | 105236847 | C                     | T         | Q969X       | 0.32                    | Additional TOPMED - MESA    |
| TET2 | 4          | 105236841 | C                     | T         | Q967*       | 0.04                    | UK Biobank                  |
| TET2 | 4          | 105236826 | C                     | T         | Q962X       | 0.24                    | Additional TOPMED - FHS     |
| TET2 | 4          | 105236820 | C                     | T         | Q960*       | 0.03                    | UK Biobank                  |
| TET2 | 4          | 105236803 | G                     | A         | W954*       | 0.23                    | UK Biobank                  |
| TET2 | 4          | 105236769 | C                     | T         | Q943*       | 0.07                    | UK Biobank                  |
| TET2 | 4          | 105236758 | AG                    | A         | T940fs      | 0.07                    | UK Biobank                  |
| TET2 | 4          | 105236752 | ACACT                 | A         | H937fs      | 0.10                    | Additional TOPMED - ARIC    |
| TET2 | 4          | 105236742 | G                     | T         | G934X       | 0.12                    | COPDGene                    |
| TET2 | 4          | 105236728 | CTG                   | C         | V930fs      | 0.09                    | UK Biobank                  |
| TET2 | 4          | 105236699 | C                     | G         | Y919*       | 0.07                    | UK Biobank                  |
| TET2 | 4          | 105236696 | G                     | GT        | Y919fs      | 0.31                    | UK Biobank                  |
| TET2 | 4          | 105236694 | AG                    | A         | R918fs      | 0.09                    | Additional TOPMED - ARIC    |
| TET2 | 4          | 105236688 | C                     | T         | Q916*       | 0.13                    | UK Biobank                  |
| TET2 | 4          | 105236688 | C                     | T         | Q916*       | 0.11                    | UK Biobank                  |
| TET2 | 4          | 105236674 | CT                    | C         | A911fs      | 0.08                    | Additional TOPMED - MESA    |
| TET2 | 4          | 105236673 | G                     | GC        | A912fs      | 0.14                    | UK Biobank                  |
| TET2 | 4          | 105236637 | TATAA                 | T         | Y899fs      | 0.27                    | UK Biobank                  |
| TET2 | 4          | 105236634 | G                     | T         | G898*       | 0.15                    | UK Biobank                  |
| TET2 | 4          | 105236631 | C                     | T         | Q897*       | 0.19                    | UK Biobank                  |
| TET2 | 4          | 105236613 | C                     | T         | Q891X       | 0.27                    | Additional TOPMED - ECLIPSE |
| TET2 | 4          | 105236583 | AG                    | A         | R881fs      | 0.22                    | COPDGene                    |
| TET2 | 4          | 105236568 | C                     | T         | Q876*       | 0.07                    | UK Biobank                  |
| TET2 | 4          | 105236568 | C                     | T         | Q876*       | 0.03                    | UK Biobank                  |
| TET2 | 4          | 105236567 | GC                    | G         | Q876fs      | 0.38                    | COPDGene                    |
| TET2 | 4          | 105236563 | CA                    | C         | K875fs      | 0.16                    | UK Biobank                  |
| TET2 | 4          | 105236543 | T                     | G         | Y867*       | 0.20                    | UK Biobank                  |
| TET2 | 4          | 105236486 | TA                    | T         | T849fs      | 0.15                    | UK Biobank                  |
| TET2 | 4          | 105236481 | C                     | T         | Q847*       | 0.10                    | UK Biobank                  |
| TET2 | 4          | 105236463 | GT                    | G         | S842fs      | 0.39                    | UK Biobank                  |
| TET2 | 4          | 105236459 | C                     | CCTAG     | H839fs      | 0.09                    | COPDGene                    |
| TET2 | 4          | 105236458 | AC                    | A         | H839fs      | 0.22                    | COPDGene                    |
| TET2 | 4          | 105236453 | TACAC                 | T         | T838fs      | 0.19                    | Additional TOPMED - ARIC    |
| TET2 | 4          | 105236446 | C                     | G         | S835X       | 0.28                    | Additional TOPMED - ECLIPSE |
| TET2 | 4          | 105236426 | CA                    | C         | K829fs      | 0.20                    | Additional TOPMED - CFS     |
| TET2 | 4          | 105236416 | C                     | G         | S825*       | 0.28                    | UK Biobank                  |
| TET2 | 4          | 105236349 | C                     | T         | Q803X       | 0.24                    | Additional TOPMED - FHS     |
| TET2 | 4          | 105236349 | C                     | T         | Q803X       | 0.14                    | Additional TOPMED - JHS     |
| TET2 | 4          | 105236347 | TC                    | T         | V802fs      | 0.46                    | Additional TOPMED - MESA    |
| TET2 | 4          | 105236325 | AGC                   | A         | S795fs      | 0.64                    | Additional TOPMED - FHS     |
| TET2 | 4          | 105236323 | C                     | G         | S794X       | 0.36                    | Additional TOPMED - ARIC    |
| TET2 | 4          | 105236308 | AT                    | A         | Q790fs      | 0.18                    | UK Biobank                  |
| TET2 | 4          | 105236304 | GAA                   | G         | N789fs      | 0.19                    | UK Biobank                  |
| TET2 | 4          | 105236303 | TG                    | T         | E788fs      | 0.20                    | UK Biobank                  |
| TET2 | 4          | 105236272 | GC                    | G         | G777fs      | 0.19                    | Additional TOPMED - MESA    |
| TET2 | 4          | 105236250 | C                     | T         | Q770*       | 0.07                    | UK Biobank                  |

| Gene | Chromosome | Position  | Reference      | Alternate | Consequence | Variant Allele Fraction | Cohort                      |
|------|------------|-----------|----------------|-----------|-------------|-------------------------|-----------------------------|
| TET2 | 4          | 105236227 | A              | AC        | H762fs      | 0.13                    | COPDGene                    |
| TET2 | 4          | 105236198 | TA             | T         | K753fs      | 0.10                    | COPDGene                    |
| TET2 | 4          | 105236193 | A              | T         | K751X       | 0.16                    | Additional TOPMED - ECLIPSE |
| TET2 | 4          | 105236187 | C              | T         | Q749X       | 0.11                    | COPDGene                    |
| TET2 | 4          | 105236172 | C              | T         | Q744*       | 0.06                    | UK Biobank                  |
| TET2 | 4          | 105236149 | C              | A         | S736*       | 0.05                    | UK Biobank                  |
| TET2 | 4          | 105236133 | C              | T         | Q731X       | 0.13                    | Additional TOPMED - ECLIPSE |
| TET2 | 4          | 105236108 | GC             | G         | P723fs      | 0.17                    | UK Biobank                  |
| TET2 | 4          | 105236089 | C              | G         | S716*       | 0.05                    | UK Biobank                  |
| TET2 | 4          | 105236089 | C              | G         | S716X       | 0.17                    | Additional TOPMED - MESA    |
| TET2 | 4          | 105236088 | TCA            | T         | S716fs      | 0.26                    | COPDGene                    |
| TET2 | 4          | 105236074 | AG             | A         | E711fs      | 0.06                    | UK Biobank                  |
| TET2 | 4          | 105236058 | C              | T         | Q706*       | 0.15                    | UK Biobank                  |
| TET2 | 4          | 105236055 | CA             | C         | Q705fs      | 0.10                    | UK Biobank                  |
| TET2 | 4          | 105236054 | T              | TC        | Q705fs      | 0.14                    | UK Biobank                  |
| TET2 | 4          | 105236027 | GT             | G         | S696fs      | 0.12                    | UK Biobank                  |
| TET2 | 4          | 105236025 | AT             | A         | M695fs      | 0.20                    | COPDGene                    |
| TET2 | 4          | 105235995 | C              | T         | Q685X       | 0.15                    | COPDGene                    |
| TET2 | 4          | 105235992 | C              | T         | Q684*       | 0.26                    | UK Biobank                  |
| TET2 | 4          | 105235992 | C              | T         | Q684X       | 0.11                    | Additional TOPMED - ARIC    |
| TET2 | 4          | 105235988 | C              | CTG       | G678fs      | 0.30                    | UK Biobank                  |
| TET2 | 4          | 105235962 | C              | T         | Q674*       | 0.08                    | UK Biobank                  |
| TET2 | 4          | 105235962 | C              | T         | Q674*       | 0.07                    | UK Biobank                  |
| TET2 | 4          | 105235953 | GC             | G         | A671fs      | 0.12                    | Additional TOPMED - MESA    |
| TET2 | 4          | 105235946 | AC             | A         | P669fs      | 0.27                    | UK Biobank                  |
| TET2 | 4          | 105235907 | AC             | A         | P656fs      | 0.13                    | Additional TOPMED - FHS     |
| TET2 | 4          | 105235902 | CA             | C         | K655fs      | 0.04                    | UK Biobank                  |
| TET2 | 4          | 105235900 | TC             | T         | F653fs      | 0.08                    | COPDGene                    |
| TET2 | 4          | 105235896 | C              | T         | Q652*       | 0.33                    | UK Biobank                  |
| TET2 | 4          | 105235892 | TC             | T         | L651fs      | 0.17                    | UK Biobank                  |
| TET2 | 4          | 105235887 | C              | T         | Q649*       | 0.09                    | UK Biobank                  |
| TET2 | 4          | 105235874 | AG             | A         | G645fs      | 0.12                    | UK Biobank                  |
| TET2 | 4          | 105235873 | AAGGT          | A         | G645fs      | 0.11                    | UK Biobank                  |
| TET2 | 4          | 105235836 | CA             | C         | Q632fs      | 0.22                    | Additional TOPMED - MESA    |
| TET2 | 4          | 105235836 | C              | T         | Q632X       | 0.37                    | Additional TOPMED - ECLIPSE |
| TET2 | 4          | 105235803 | AC             | A         | Q622fs      | 0.04                    | UK Biobank                  |
| TET2 | 4          | 105235794 | C              | T         | Q618*       | 0.05                    | UK Biobank                  |
| TET2 | 4          | 105235778 | TG             | T         | L615fs      | 0.05                    | UK Biobank                  |
| TET2 | 4          | 105235778 | T              | TG        | P612fs      | 0.45                    | Additional TOPMED - JHS     |
| TET2 | 4          | 105235719 | C              | T         | Q593*       | 0.27                    | UK Biobank                  |
| TET2 | 4          | 105235719 | C              | T         | Q593*       | 0.06                    | UK Biobank                  |
| TET2 | 4          | 105235715 | G              | GT        | Y592fs      | 0.22                    | UK Biobank                  |
| TET2 | 4          | 105235713 | C              | T         | Q591X       | 0.29                    | COPDGene                    |
| TET2 | 4          | 105235705 | C              | A         | S588*       | 0.14                    | UK Biobank                  |
| TET2 | 4          | 105235705 | C              | G         | S588X       | 0.43                    | Additional TOPMED - ARIC    |
| TET2 | 4          | 105235662 | C              | T         | Q574*       | 0.38                    | UK Biobank                  |
| TET2 | 4          | 105235658 | T              | TCA       | F572fs      | 0.13                    | COPDGene                    |
| TET2 | 4          | 105235657 | TTCACCAAGCGGAA | T         | H573fs      | 0.05                    | UK Biobank                  |
| TET2 | 4          | 105235647 | GC             | G         | P570fs      | 0.09                    | UK Biobank                  |
| TET2 | 4          | 105235634 | G              | A         | W564*       | 0.15                    | UK Biobank                  |
| TET2 | 4          | 105235619 | T              | A         | Y559*       | 0.07                    | UK Biobank                  |
| TET2 | 4          | 105235619 | T              | A         | Y559X       | 0.19                    | COPDGene                    |
| TET2 | 4          | 105235611 | C              | T         | Q557*       | 0.10                    | UK Biobank                  |
| TET2 | 4          | 105235592 | AG             | A         | D551fs      | 0.25                    | Additional TOPMED - ARIC    |
| TET2 | 4          | 105235590 | C              | T         | R550*       | 0.15                    | UK Biobank                  |
| TET2 | 4          | 105235590 | C              | T         | R550*       | 0.11                    | UK Biobank                  |
| TET2 | 4          | 105235590 | C              | T         | R550*       | 0.08                    | UK Biobank                  |
| TET2 | 4          | 105235590 | C              | T         | R550X       | 0.22                    | Additional TOPMED - MESA    |
| TET2 | 4          | 105235543 | GAAC           | G         | N535fs      | 0.06                    | UK Biobank                  |
| TET2 | 4          | 105235543 | GAAC           | G         | R534fs      | 0.07                    | COPDGene                    |
| TET2 | 4          | 105235537 | T              | A         | L532X       | 0.52                    | COPDGene                    |
| TET2 | 4          | 105235479 | A              | T         | K513*       | 0.20                    | UK Biobank                  |
| TET2 | 4          | 105235468 | C              | G         | S509X       | 0.17                    | Additional TOPMED - ARIC    |
| TET2 | 4          | 105235436 | TC             | T         | P499fs      | 0.15                    | Additional TOPMED - ARIC    |
| TET2 | 4          | 105235421 | AG             | A         | T495fs      | 0.44                    | UK Biobank                  |
| TET2 | 4          | 105235420 | CA             | C         | A493fs      | 0.13                    | Additional TOPMED - MESA    |
| TET2 | 4          | 105235411 | T              | TA        | Q491fs      | 0.05                    | UK Biobank                  |
| TET2 | 4          | 105235289 | G              | GAA       | I451fs      | 0.08                    | UK Biobank                  |
| TET2 | 4          | 105235260 | C              | T         | Q440*       | 0.14                    | UK Biobank                  |
| TET2 | 4          | 105235253 | C              | A         | Y437*       | 0.10                    | UK Biobank                  |
| TET2 | 4          | 105235234 | TA             | T         | E432fs      | 0.34                    | UK Biobank                  |
| TET2 | 4          | 105235218 | CTGAA          | C         | L426fs      | 0.10                    | COPDGene                    |
| TET2 | 4          | 105235172 | TC             | T         | P411fs      | 0.14                    | Additional TOPMED - JHS     |
| TET2 | 4          | 105235158 | CT             | C         | L406fs      | 0.17                    | Additional TOPMED - ECLIPSE |
| TET2 | 4          | 105235149 | C              | T         | Q403X       | 0.24                    | Additional TOPMED - ARIC    |
| TET2 | 4          | 105235096 | C              | A         | S385*       | 0.15                    | UK Biobank                  |
| TET2 | 4          | 105235052 | T              | G         | Y370X       | 0.15                    | Additional TOPMED - MESA    |
| TET2 | 4          | 105235003 | C              | G         | S354*       | 0.27                    | UK Biobank                  |
| TET2 | 4          | 105235003 | C              | G         | S354X       | 0.12                    | COPDGene                    |
| TET2 | 4          | 105234975 | A              | T         | K345X       | 0.27                    | Additional TOPMED - MESA    |
| TET2 | 4          | 105234966 | G              | T         | G342X       | 0.21                    | COPDGene                    |
| TET2 | 4          | 105234963 | C              | T         | Q341*       | 0.08                    | UK Biobank                  |
| TET2 | 4          | 105234934 | T              | TA        | C332fs      | 0.09                    | UK Biobank                  |
| TET2 | 4          | 105234933 | AT             | A         | I331fs      | 0.31                    | Additional TOPMED - FHS     |
| TET2 | 4          | 105234922 | C              | A         | S327*       | 0.08                    | UK Biobank                  |
| TET2 | 4          | 105234915 | C              | T         | Q325*       | 0.17                    | UK Biobank                  |
| TET2 | 4          | 105234915 | C              | T         | Q325X       | 0.24                    | Additional TOPMED - ARIC    |
| TET2 | 4          | 105234912 | C              | T         | Q324*       | 0.12                    | UK Biobank                  |
| TET2 | 4          | 105234900 | GA             | G         | E320fs      | 0.13                    | COPDGene                    |
| TET2 | 4          | 105234893 | GA             | G         | K318fs      | 0.10                    | COPDGene                    |
| TET2 | 4          | 105234891 | C              | T         | Q317*       | 0.04                    | UK Biobank                  |
| TET2 | 4          | 105234784 | ACT            | A         | S282fs      | 0.09                    | UK Biobank                  |
| TET2 | 4          | 105234780 | TC             | T         | S280fs      | 0.18                    | UK Biobank                  |
| TET2 | 4          | 105234763 | TC             | T         | I274fs      | 0.17                    | Additional TOPMED - MESA    |
| TET2 | 4          | 105234763 | TC             | T         | I274fs      | 0.10                    | Additional TOPMED - ARIC    |
| TET2 | 4          | 105234763 | TC             | T         | I274fs      | 0.10                    | COPDGene                    |
| TET2 | 4          | 105234763 | TC             | T         | N275fs      | 0.15                    | UK Biobank                  |
| TET2 | 4          | 105234763 | TC             | T         | N275fs      | 0.13                    | UK Biobank                  |
| TET2 | 4          | 105234763 | TC             | T         | N275fs      | 0.10                    | UK Biobank                  |

| Gene  | Chromosome | Position  | Reference                  | Alternate | Consequence | Variant Allele Fraction | Cohort                      |
|-------|------------|-----------|----------------------------|-----------|-------------|-------------------------|-----------------------------|
| TET2  | 4          | 105234763 | TC                         | T         | N275fs      | 0.07                    | UK Biobank                  |
| TET2  | 4          | 105234763 | TC                         | T         | N275fs      | 0.06                    | UK Biobank                  |
| TET2  | 4          | 105234700 | ACAGT                      | A         | S254fs      | 0.14                    | UK Biobank                  |
| TET2  | 4          | 105234681 | TCTCA                      | T         | H248fs      | 0.17                    | UK Biobank                  |
| TET2  | 4          | 105234636 | C                          | T         | Q232*       | 0.16                    | UK Biobank                  |
| TET2  | 4          | 105234633 | TC                         | T         | S231fs      | 0.23                    | UK Biobank                  |
| TET2  | 4          | 105234621 | GA                         | G         | T229fs      | 0.18                    | UK Biobank                  |
| TET2  | 4          | 105234621 | G                          | GA        | T229fs      | 0.17                    | UK Biobank                  |
| TET2  | 4          | 105234591 | TC                         | T         | V218fs      | 0.41                    | UK Biobank                  |
| TET2  | 4          | 105234565 | C                          | CT        | N209fs      | 0.05                    | UK Biobank                  |
| TET2  | 4          | 105234527 | GA                         | G         | N196fs      | 0.11                    | COPDGene                    |
| TET2  | 4          | 105234499 | A                          | AG        | K188fs      | 0.21                    | UK Biobank                  |
| TET2  | 4          | 105234368 | CG                         | C         | D143fs      | 0.13                    | Additional TOPMED - ARIC    |
| TET2  | 4          | 105234368 | CG                         | C         | D143fs      | 0.05                    | UK Biobank                  |
| TET2  | 4          | 105234361 | A                          | ATG       | D143fs      | 0.06                    | UK Biobank                  |
| TET2  | 4          | 105234245 | TTCTC                      | T         | S104fs      | 0.05                    | UK Biobank                  |
| TET2  | 4          | 105234210 | C                          | T         | Q90X        | 0.22                    | Additional TOPMED - ARIC    |
| TET2  | 4          | 105234191 | AG                         | A         | G84fs       | 0.16                    | COPDGene                    |
| TET2  | 4          | 105234164 | GA                         | G         | S75fs       | 0.15                    | Additional TOPMED - ARIC    |
| TET2  | 4          | 105234155 | T                          | TA        | N71fs       | 0.25                    | Additional TOPMED - ECLIPSE |
| TP53  | 17         | 7676193   | C                          | A         | G59V        | 0.07                    | UK Biobank                  |
| TP53  | 17         | 7676121   | G                          | A         | A83V        | 0.04                    | UK Biobank                  |
| TP53  | 17         | 7675995   | G                          | A         | T125M       | 0.09                    | UK Biobank                  |
| TP53  | 17         | 7675992   | A                          | A         | c.e4-2T>G   | 0.32                    | UK Biobank                  |
| TP53  | 17         | 7675233   | A                          | T         | S127T       | 0.08                    | UK Biobank                  |
| TP53  | 17         | 7675230   | G                          | T         | P128T       | 0.28                    | UK Biobank                  |
| TP53  | 17         | 7675217   | T                          | A         | K132M       | 0.18                    | Additional TOPMED - ECLIPSE |
| TP53  | 17         | 7675183   | CACAGGGCAGGCTTGGCCAGTTGGCA | C         | C135fs      | 0.06                    | UK Biobank                  |
| TP53  | 17         | 7675139   | C                          | A         | R158L       | 0.22                    | UK Biobank                  |
| TP53  | 17         | 7675119   | G                          | A         | Q165X       | 0.18                    | COPDGene                    |
| TP53  | 17         | 7675088   | C                          | T         | R175H       | 0.05                    | UK Biobank                  |
| TP53  | 17         | 7675070   | C                          | T         | R181H       | 0.13                    | UK Biobank                  |
| TP53  | 17         | 7674962   | G                          | A         | P190L       | 0.19                    | UK Biobank                  |
| TP53  | 17         | 7674947   | A                          | G         | I195T       | 0.10                    | UK Biobank                  |
| TP53  | 17         | 7674918   | A                          | C         | Y205D       | 0.03                    | UK Biobank                  |
| TP53  | 17         | 7674872   | T                          | C         | Y220C       | 0.15                    | COPDGene                    |
| TP53  | 17         | 7674872   | T                          | C         | Y220C       | 0.13                    | COPDGene                    |
| TP53  | 17         | 7674864   | GC                         | G         | P222fs      | 0.08                    | Additional TOPMED - FHS     |
| TP53  | 17         | 7674263   | A                          | T         | Y234N       | 0.08                    | UK Biobank                  |
| TP53  | 17         | 7674257   | A                          | G         | Y236H       | 0.11                    | UK Biobank                  |
| TP53  | 17         | 7674252   | C                          | T         | M237I       | 0.47                    | COPDGene                    |
| TP53  | 17         | 7674250   | C                          | T         | C238Y       | 0.35                    | Additional TOPMED - FHS     |
| TP53  | 17         | 7674241   | G                          | A         | S241F       | 0.16                    | UK Biobank                  |
| TP53  | 17         | 7674238   | C                          | T         | C242Y       | 0.14                    | Additional TOPMED - FHS     |
| TP53  | 17         | 7674229   | C                          | T         | G245D       | 0.20                    | COPDGene                    |
| TP53  | 17         | 7674220   | C                          | T         | R248Q       | 0.66                    | Additional TOPMED - ARIC    |
| TP53  | 17         | 7674220   | C                          | T         | R248Q       | 0.26                    | COPDGene                    |
| TP53  | 17         | 7674214   | G                          | A         | P250L       | 0.11                    | UK Biobank                  |
| TP53  | 17         | 7673835   | C                          | T         | G262D       | 0.13                    | COPDGene                    |
| TP53  | 17         | 7673806   | C                          | T         | V272M       | 0.13                    | UK Biobank                  |
| TP53  | 17         | 7673802   | C                          | T         | R273H       | 0.42                    | UK Biobank                  |
| TP53  | 17         | 7673802   | C                          | T         | R273H       | 0.14                    | Additional TOPMED - ECLIPSE |
| TP53  | 17         | 7673802   | C                          | T         | R273H       | 0.13                    | Additional TOPMED - ECLIPSE |
| TP53  | 17         | 7673802   | C                          | T         | R273H       | 0.12                    | Additional TOPMED - ECLIPSE |
| TP53  | 17         | 7673802   | C                          | T         | R273H       | 0.07                    | UK Biobank                  |
| TP53  | 17         | 7673802   | C                          | T         | R273H       | 0.05                    | UK Biobank                  |
| TP53  | 17         | 7673782   | T                          | C         | R280G       | 0.04                    | UK Biobank                  |
| TP53  | 17         | 7673779   | C                          | T         | D281N       | 0.41                    | Additional TOPMED - JHS     |
| TP53  | 17         | 7673776   | G                          | A         | R282W       | 0.10                    | UK Biobank                  |
| TP53  | 17         | 7673776   | G                          | A         | R282W       | 0.08                    | UK Biobank                  |
| TP53  | 17         | 7673772   | C                          | T         | R283H       | 0.07                    | UK Biobank                  |
| TP53  | 17         | 7673767   | C                          | T         | E285K       | 0.08                    | UK Biobank                  |
| TP53  | 17         | 7673764   | C                          | T         | E286K       | 0.07                    | UK Biobank                  |
| TP53  | 17         | 7673744   | TTCTTGCGGAGATTCTC          | C         | E287fs      | 0.10                    | Additional TOPMED - MESA    |
| TP53  | 17         | 7673739   | T                          | T         | E294G       | 0.04                    | UK Biobank                  |
| TP53  | 17         | 7673610   | T                          | A         | c.e9+2A>T   | 0.09                    | UK Biobank                  |
| TP53  | 17         | 7669672   | CT                         | C         | K373fs      | 0.09                    | UK Biobank                  |
| TP53  | 17         | 7579374   | C                          | T         | G105S       | 0.10                    | ICGN-EOCOPD                 |
| TP53  | 17         | 7577091   | G                          | C         | R283G       | 0.03                    | ICGN-EOCOPD                 |
| TP53  | 17         | 7577018   | C                          | T         | T           | 0.05                    | ICGN-EOCOPD                 |
| U2AF1 | 21         | 43094667  | T                          | C         | Q157R       | 0.62                    | COPDGene                    |
| U2AF1 | 21         | 43094667  | T                          | G         | Q157R       | 0.54                    | Additional TOPMED - FHS     |
| U2AF1 | 21         | 43094667  | T                          | G         | Q157R       | 0.54                    | COPDGene                    |
| U2AF1 | 21         | 43094667  | T                          | G         | Q157R       | 0.40                    | COPDGene                    |
| WT1   | 11         | 32428495  | A                          | C         | c.769+2T>G  | 0.16                    | Additional TOPMED - ECLIPSE |
| ZRSR2 | X          | 15823052  | C                          | T         | S420*       | 0.04                    | UK Biobank                  |
| ZRSR2 | X          | 15822249  | C                          | G         | Q110*       | 0.17                    | ICGN-EOCOPD                 |
| ZRSR2 | X          | 15818644  | T                          | A         | c.e9+2T>A   | 0.37                    | UK Biobank                  |
| ZRSR2 | X          | 15790976  | G                          | GTC       | K29fs       | 0.08                    | UK Biobank                  |

## **Extended Methods**

### **Cohort Descriptions**

#### *Trans-Omics for Precision Medicine (TOPMed)*

The Trans-Omics for Precision Medicine (TOPMed) program is sponsored by the National Institutes of Health (NIH) National Heart, Lung and Blood Institute (NHLBI) to improve scientific understanding of the biological processes that underlie heart, lung, and sleep disorders.<sup>1</sup> TOPMed consists of over 155,000 participants from > 80 studies with different study design. For this analysis, we selected six studies (including COPDGene).

#### *The COPDGene study*

The COPDGene study is a multi-center epidemiologic and genetic study of current and ex-smokers, with the goal of discovering genetic factors contributing to the development of COPD. COPDGene has enrolled 10,198 smokers with and without COPD across GOLD stages, including both Non-Hispanic White (NHW) and African-American (AA) subjects. The details have been described elsewhere<sup>2</sup>. Blood samples of 8808 COPDGene subjects went through whole genome sequencing in the TOPMed Freeze 5b release. After filtering based on phenotype quality and number of years between spirometry measure and blood draw, 8395 subjects were included as the discovery dataset (Table 1).

#### *Additional TOPMed Cohorts*

The six studies include the Atherosclerosis Risk in Communities (ARIC) Study, the Cleveland Family (CFS) study, the Framingham Heart (FHS) study, the Jackson Heart (JHS) study, and the Multi-Ethnic Study of Atherosclerosis (MESA).<sup>3</sup> The ARIC study is a prospective population-based study conducted in four U.S. communities to study risk factors for atherosclerosis. The CFS study is a family-based study ascertained through probands with obstructive sleep apnea (OSA) identified in Cleveland. The FHS study recruited multi-generations of individuals from the town of Framingham, Massachusetts to study the risk factors contributing to cardiovascular disease (CVS). The JHS is a mixed family and population-based study of adult African Americans in Jackson, Mississippi. Lastly, MESA is a multi-ethnic population-based study from six communities in the U.S. The Evaluation of COPD Longitudinally to Identify Predictive Surrogate Endpoints (ECLIPSE) study was a longitudinal study of subjects with COPD, enrolled at multiple study centers in Europe, the USA, Canada, and New Zealand, with a small number of controls with normal lung function<sup>4</sup>. 12756 samples in these six studies were in the TOPMed Freeze 5b release with valid phenotype information after quality control, and CHIP status. We removed samples whose absolute difference between age at blood draw and assessment of COPD status using spirometry measures were greater than 5 years. This removed 1 subject from COPDGene, 83 subjects from ARIC, 122 subjects from CFS, 693 subjects from FHS, 21 subjects from JHS, 466 subjects from MESA, and no subject from ECLIPSE. After excluding these samples, 19664 subjects were included in the analyses. A histogram of the distribution of this time difference among the filtered samples in the COPDGene and additional TOPMed cohorts can be found in Figure S6.

#### *The EOCOPD study and the ICGN study (ICGN-EOCOPD)*

The Boston Early-Onset COPD study (EOCOPD) and the International COPD Genetics Network (ICGN) study are family-based studies focusing on families with severe COPD. Probands from EOCOPD were selected to be subjects with physician-diagnosis of COPD with  $FEV1 \leq 40\%$  predicted, aged  $\leq 53$  years old, without severe alpha-1 antitrypsin deficiency. All first-degree relatives, older second-degree relatives, and additional affected family members were enrolled. In the ICGN study, probands were selected to be COPD cases with  $FEV1 < 60\%$  predicted,  $FEV1/FVC < 90\%$  predicted at ages 45-65 years, pack-years  $\geq 5$ , and have at least one eligible sibling. 196 families from EOCOPD and 462 families from the ICGN study were selected for whole exome sequencing (Table 2). The times at blood draw and assessment of COPD status using pulmonary function data are the same for all samples.

#### *UK Biobank*

The UK Biobank is a population-based cohort of >500,000 UK adult residents aged 40-69 years at recruitment between 2006-2010.<sup>5</sup> Baseline assessment included medical history, smoking history, vital signs, phlebotomy, and spirometry to obtain the forced expiratory volume in 1 second (FEV<sub>1</sub>) and forced vital capacity (FVC) (Pneumotrac 6800, Vitalograph). For the present analysis, the UK Biobank study cohort included 27,617 unrelated white European ancestry individuals with available whole exome sequences and spirometry data. Related individuals within 3 degree of relatedness were identified using the Kinship-Based Inference for Genome-Wide Association Studies tool and excluded.<sup>6</sup> Individuals with extreme pulmonary function test outliers (defined as Z>5 or Z<-5 for FEV<sub>1</sub>, FVC, and/or the FEV<sub>1</sub>/FVC ratio) were additionally excluded. These analyses were conducted under UK Biobank application numbers 40375, 50834, and 7089.

Predicted FEV<sub>1</sub> was calculated using predictive models derived from the full UK Biobank (excluding extreme pulmonary function test outliers) using age, age<sup>2</sup>, sex, race, and height as covariates. COPD was defined based on spirometry data as FEV<sub>1</sub>/FVC <0.7, and GOLD stages were designated based on percent predicted FEV<sub>1</sub> (GOLD stage 1: FEV<sub>1</sub> ≥80% predicted; GOLD stage 2: FEV<sub>1</sub> ≥50% and <80% predicted; GOLD stage 3: FEV<sub>1</sub> ≥30% and <50% predicted; GOLD stage 4: FEV<sub>1</sub> <30% predicted). The times at blood draw and assessment of COPD status using spirometry measures are the same for all samples in the UK Biobank.

## DNA Sequencing Information

### *Whole genome sequencing in TOPMed*

TOPMed WGS genotype call sets (called Freezes) of peripheral blood samples are being released on dbGaP periodically, with the analyses described here performed on Freeze 5b with the exception of the ECLIPSE cohort from Freeze 8. The DNA sample handling and sequencing were done at six sequencing centers (New York Genome Center, the Broad Institute of MIT and Harvard, the University of Washington Northwest Genomics Center, Illumina Genomic Services, Macrogen Corp., and Baylor Human Genome Sequencing Center), with different processing pipelines. Details about the sequencing methods can be found here: <https://www.nhlbiwgs.org/topmed-whole-genome-sequencing-project-freeze-5b-phases-1-and-2>. The resulting sequencing data were realigned and harmonized by the TOPMed Informatics Research Center (IRC) to create joint genotype calling set. Quality control was performed at each stage of the process by the Sequencing Centers, the IRC, and the TOPMed Data Coordinating Center (DCC). Details are found on the TOPMed website (<https://www.nhlbiwgs.org/topmed-whole-genome-sequencing-project-freeze-5b-phases-1-and-2>). The WGS data in TOPMed had an average of 30x coverage and have been quality controlled using multiple criteria, including but not limited to excess heterozygosity filter and mendelian discordance filter.

### *Whole exome sequencing in ICGN-EOCOPD and the UKBiobank*

The whole exome sequencing process for the ICGN-EOCOPD blood samples were performed at the University of Washington using Nimblegen V2 exome capture and Illumina platforms. Alignment, variant calling and quality control were performed using bwa, GATK, and in-house pipelines respectively, as previously described.<sup>7</sup> The median exome sequencing coverage for observed polymorphic CHIP variants in ICGN-EOCOPD is 26.

Genomic DNA from blood samples for the UK Biobank was sequenced at the Regeneron Genetics Center from the UK Biobank.<sup>8</sup> Briefly, multiplexed DNA libraries were created and IDT's xGen probe library was used for exome target capture. The multiplexed samples were pooled and sequenced using 75 base pair paired-end reads on the Illumina Novaseq 6000 platform using the S2 flow cells. Sample-specific FASTQ files, representing all the reads generated for that sample, were then aligned to the GRCh38 genome reference with BWA-mem2. The resultant binary alignment file (BAM) for each sample contained the mapped reads' genomic coordinates, quality information, and the degree to which a particular read differed from the reference at its mapped location. Aligned reads in the BAM file were then evaluated to identify and flag duplicate reads with the Picard3 MarkDuplicates tool, producing an alignment file with all potential duplicate reads marked for exclusion in downstream analyses. Upon completion of variant calling, individual sample BAM files were converted to fully lossless CRAM files using samtools.

Following completion of sample sequencing, samples showing disagreement between genetically determined and reported sex, high rates of heterozygosity/contamination (D-stat > 0.4), low sequence coverage (less than 85% of targeted bases achieving 20X coverage) or genetically identified sample duplicates, and WES variants discordant with genotyping chip were excluded. The CRAM files were then submitted by the Regeneron Genetics Center to the UK Biobank data repository for distribution. For a random 1000 samples, the median coverage with a mapping quality >30 was 56 in the UK Biobank,

### Variant Identification and Determination of CHIP

Putative somatic SNPs and short indels were called from the CRAM files with GATK (version 4.1.1.0) Mutect2 (<https://software.broadinstitute.org/gatk>). Briefly, Mutect2 searches for sites where there is evidence for variation, and then performs local reassembly. It uses an external reference of recurrent sequencing artifacts termed a “panel of normal” derived from 100 sequenced samples to filter out these sites, and calls variants at sites where there is evidence for somatic variation. An external reference of germline variants from the gnomad resource (<https://gnomad.broadinstitute.org/>) was provided to filter out likely germline calls. We deployed this variant calling process on Google Cloud using the Terra platform ([www.terra.bio](http://www.terra.bio)). The cloud workflow scripts are available from download from the github repository (<https://github.com/gatk-workflows/gatk4-somatic-snvs-indels>) and docker images with configured cloud software are available at the dockstore repository ([https://dockstore.org/workflows/github.com/gatk-workflows/gatk4-somatic-snvs-indels/mutect2\\_nio:2.5.0?tab=info](https://dockstore.org/workflows/github.com/gatk-workflows/gatk4-somatic-snvs-indels/mutect2_nio:2.5.0?tab=info)). The caller was run individually for each sample with the same settings.

To identify samples CHIP, we utilized a previously published pre-specified list of variants in genes known to be recurrent drivers of myeloid malignancies.<sup>9</sup> The variants were selected on the basis of being reported in the literature and/or the Catalog of Somatic Mutations in Cancer (COSMIC, <http://cancer.sanger.ac.uk/cancergenome/projects/cosmic/>). We used minimum variant read counts of 3 reads and required evidence of a variant on both forward and reverse reads. Frameshift, nonsense, and splice-site mutations were further excluded if they occurred in the first or last 10% of the gene open reading frame, unless mutations in those regions had been previously reported, (e.g. *DNMT3A*). Frameshift mutations were also excluded if the insertions/deletions occurred in homo-polymer repeats (5 consecutive reads of the same nucleotide). For *TET2*, all missense variants in particular regions were considered somatic if the variant allele fraction (VAF) significantly deviated from the expected distribution for a germline allele (defined as a p-value from a binomial test of less than 0.001 assuming a probability of success in a single Bernoulli experiment of 0.5 and using the alternate allele read count as the number of successes and the alternate allele read count + reference allele read count as the number of trials). Specific quality control metrics from these cohorts were previously performed by determining the concordance of mutation calls made from whole genome sequencing and deep, targeted sequencing. In 100% of cases the mutations called from the whole genome data were validated.<sup>9</sup>

### Statistical Methods

All statistical methods were performed using R 3.6.3 ([www.r-project.org](http://www.r-project.org)) or Prism 8.4.3.

#### *CHIP and COPD*

We examined the effect of CHIP status on moderate-to-severe COPD, severe or very severe COPD, and FEV<sub>1</sub>% predicted as a continuous measure. Moderate-to-severe COPD was defined as Global Initiative for Chronic Obstructive Lung Diseases (GOLD) stages GOLD 2-4 subjects with pre-bronchodilator FEV<sub>1</sub>% predicted < 80% and FEV<sub>1</sub>/FVC < 0.70. Severe COPD was defined as GOLD stages 3-4 subjects with FEV<sub>1</sub>% predicted < 50% and FEV<sub>1</sub>/FVC < 0.70. To look at CHIP and COPD severity, we examined the association between CHIP and FEV<sub>1</sub>% predicted within all subjects and within GOLD 2-4 COPD..

For the COPDGene and UK Biobank data, logistic regression was applied to examine the associations between moderate-to-severe COPD status and CHIP, severe COPD status and CHIP, and COPD severity and

CHIP, while adjusting for age (at blood draw), age-squared, gender, sequencing center, number of pack-years, ever versus never smoking status, and top 10 principal components of genetic ancestry. Moderate-to-severe COPD status was defined to be 1 for patients with GOLD airflow limitation severity level 2-4, and 0 for patients with normal spirometry (GOLD 0). Severe or very severe COPD status was defined to be 1 for patients with GOLD level 3-4, and 0 for patients with GOLD level 0. To compare COPD GOLD 3-4 to GOLD 2, case status was represented as a binary variable that equals 1 for patients with GOLD level 3-4 and 0 for patients with GOLD level 2. CHIP was represented using a binary variable that equals 1 for carriers of pre-specified list of CHIP variants (described above) and 0 for non-carriers.

For the additional TOPMed cohorts and ICGN-EOCOPD datasets, generalized linear mixed effect models and linear mixed effect models were applied to take into account the family relatedness between subjects using the GENESIS package.<sup>10</sup> The same set of covariates were adjusted as in COPDGene. Random-effects meta-analyses were conducted for the additional TOPMed cohorts for all the phenotypes using the metafor package. The 95% CI reported for the primary cohort (COPDGene) was adjusted for the six phenotypes we examined, and the significance level was defined as  $0.05/6=0.00833$  for the primary cohort. Replication was defined as reaching a nominal significance level of 0.05 using a one-sided test with consistent direction of effect in at least one of the three replication cohorts. The reported 95% CIs for the additional cohorts (TOPMed, ICGN-EOCOPD, and UK Biobank) were not adjusted for multiple testing.

As secondary analyses, we also examined whether there is any specific gene (as a binary variable with reference to no CHIP at all) associated with COPD status. We looked within subjects with CHIP to test whether the maximum VAF of the CHIP genes are associated with COPD status in the discovery cohort. We also examined within COPD cases that whether there were any genes with CHIP mutations that were more frequent in the severe or very severe COPD cases (GOLD level 3-4) than moderate COPD cases (GOLD level 2) using logistic regression. Finally, we determined if the associations between CHIP and COPD remained after incorporation of the polygenic risk score (PRS), a measure of germline genetic variation, which was calculated for all participants in COPDGene as previously described.<sup>11</sup> We also adjusted for incident lung cancer, lung cancer mortality, other self-reported cancers, cardiovascular disease, and the highest degree of school completed as a measure of socioeconomic status in COPDGene and UK Biobank.

For the incidence analysis in UK Biobank we first excluded individuals with COPD at baseline using our study definition ( $n=3,676$ ) or with prevalent COPD at study enrollment by self-report or ICD code (additional  $n=336$ ), yielding 23,605 individuals at risk for incident COPD. Using ICD code-based incident COPD ascertainment (ICD-10 J41, J41.0, J42, J43, J43.0, J43.1, J43.2, J43.8, J43.9, J44, J44.0, J44.1, J44.8, J44.9; ICD-9 491, 491.2, 491.9, 492, 492.9, 496, 496.9), 337 individuals (1.4%) developed incident COPD over a median 10.0 [IQR 0.9-10.2] years of follow-up. To identify the hazard ratios for the development of COPD with presence of CHIP with a VAF > 0.1 and VAF < 0.1, we used the following Cox model: Incident COPD ~ age + sex + PC 1-10 + ever-smoking + pack-years + educational attainment + Townsend deprivation index + CHIP.

### *CHIP and lung function*

For the analysis between CHIP and lung function, linear regression on pre-bronchodilator FEV<sub>1</sub>% predicted was applied while adjusting for the same set of covariates as for COPD. We also examined the association between CHIP and FEV<sub>1</sub>% predicted within subjects with moderate-to-severe COPD (GOLD level 2-4) subjects.

### *CHIP and Smoking*

We examined the effect of number of pack years of smoking on CHIP status. We applied logistic regression with CHIP status as the binary response, while adjusting for age (at blood drawn), gender, ever versus never smoking status, sequencing center, race, and top 10 principal components of ancestry in each cohort. We conducted random-effects meta-analyses of the TOPMed cohorts using the metafor package in R since the ascertainment criteria vary across the cohorts. The Dersimonian and Laird method was used to estimate the between-study variance for the binary outcomes, and the restricted maximum likelihood estimator (REML) was

used for the continuous outcomes. The distribution of age and number of pack-years of smoking across all TOPMed cohorts can be found in Supplementary Figures S1 and S5A, respectively.

### Mouse Models

Mice carrying *Tet2*-deleted or *Tet2*-wild-type hematopoietic cells were generated by bone marrow transplantation of 8 week old donors as previously described.<sup>12</sup> For the full chimerism smoke and poly(I:C) experiments, RBC-lysed whole bone marrow from CD45.2<sup>+</sup>; *Tet2*<sup>+/+</sup>; *Vav1-Cre* or CD45.2<sup>+</sup>; *Tet2*<sup>fl/-</sup>; *Vav1-Cre* were transplanted into lethally irradiated (475 cGy x 2) CD45.1<sup>+</sup> recipient animals. Sixteen weeks later, the mice were exposed to air or mixed mainstream and side-stream cigarette smoke from 1R3F Kentucky Research cigarettes 6 days per week for a total of 2 hours per day in Teague chambers (Teague Enterprises, Woodland, CA). The cigarette smoke exposures produced daily total suspended particles counts ~150 mg/m<sup>3</sup>. Mice were weighed at baseline and every two weeks thereafter. During weeks five and six of smoke exposure, the mice were treated by intraperitoneal injection with 50 ug poly(I:C) suspended in PBS (total volume 30 uL) twice per week (every other day) for two weeks, after which time the mice were euthanized.

For the partial chimerism, cigarette smoke experiment, c-kit selection (Miltenyi Biotec) was performed on whole bone marrow after RBC lysis from CD45.2<sup>+</sup>; *Tet2*<sup>+/+</sup>; *Vav1-Cre*, CD45.2<sup>+</sup>; *Tet2*<sup>fl/-</sup>; *Vav1-Cre* or CD45.1<sup>+</sup> (SJL) animals. The cells were counted and mixed such that 15% were CD45.2<sup>+</sup> (either *Tet2*<sup>+/+</sup>; *Vav1-Cre* or *Tet2*<sup>fl/-</sup>; *Vav1-Cre*) and 85% CD45.1<sup>+</sup>. The mixture ratios were confirmed by flow cytometry then transplanted into lethally irradiated (475 cGy x 2) CD45.1<sup>+</sup> recipient animals. Four weeks after transplant CD45.1/CD45.2 chimerism was confirmed. The mice were then exposed to air or mixed mainstream and side-stream cigarette smoke from 1R3F Kentucky Research cigarettes 6 days per week for a total of 2 hours per day in Teague chambers (Teague Enterprises, Woodland, CA). The cigarette smoke exposures produced daily total suspended particles counts ~150 mg/m<sup>3</sup>. Peripheral blood chimerism was checked approximately every month for six months, at which time the mice were euthanized.

At the time of euthanasia, the lungs were flushed with saline then fixed at constant pressure of 25 cm H<sub>2</sub>O with formalin. The lungs were then sectioned and stained for analysis. For quantification of emphysema, sections of lungs subject to Gill's staining were imaged at 10x. The images were then analyzed using Scion image (available at Wikiversity.org) as previously described.<sup>13</sup>

### Single-cell RNA-sequencing

Single-cell RNA-sequencing was performed on fresh mouse lung tissue. Sixteen mice were processed: four *Tet2*-wild-type exposed to air, four *Tet2*-wild-type exposed to cigarettes smoke and poly(I:C), four *Tet2*-knockout exposed to air, and four *Tet2*-knockout exposed to cigarettes smoke and poly(I:C) (Figure 4A). The mice were euthanized and after flushing the pulmonary vasculature via instillation of 30 mL phosphate buffer saline into the right ventricle the lungs were extracted, manually minced, then incubated in Collagenase (2mg/mL Sigma) in Hanks buffered salt solution for 30 minutes at 37 degrees with agitation. The samples were then passed through a 40uM filter to generate single cell suspensions then subject to RBC lysis. Dead cells were then depleted using the dead cell removal kit from Miltenyi (Cat 130-090-101) and LS columns. The cells were counted manually using trypan blue and resuspended at a concentration of 1000 cells per uL of PBS with 2% fetal bovine serum. Next, 10,000 - 15,000 cells were loaded onto a 10x Genomics chip. Further processing was done using the recommended procedures for the 10x Genomics 3' v3 chemistry. Libraries were sequenced on the NovaSeq S1 (28+8+91 cycles).

### Single-cell RNA-seq analysis

Fastq files were demultiplexed using the mkfastq command from cellranger v3.1.0, followed by cellranger count (with mm10 as a reference) and aggr to generate batch-corrected gene expression matrices. Mouse 2 (*Tet2*-wild-type CS/ poly(I:C)) was excluded because it had much fewer reads per cell. Only cells with >2000 UMIs and >1000 genes and <15% mitochondrial reads and <15% rRNA alignments were kept for further analysis.



## Dimensionality reduction and cluster annotation

Data were imported into Seurat version 3.2.2 using R version 3.6.1. Normalization, variable feature identification and data scaling were performed using Seurat defaults. Using 50 dimensions from the principal component analysis, we generated UMAP coordinates using the RunUMAP function and clusters using FindNeighbors and FindClusters functions (resolution = 0.4). Clusters were annotated by expression of both canonical marker genes (such as CD3 for T cells and CD19 for B cells) and previously published gene sets that define cell clusters in the mouse lung.<sup>13</sup> Some clusters consisted of cells that co-expressed multiple lineage-defining marker genes (such as CD3 and CD19). These doublet clusters were removed from further analyses (6.0% of cells). After doublet removal, 25 clusters remained (Figure 4C, Table S17), some of which included multiple cell types, particularly among the non-hematopoietic cells. Further sub-clustering was deferred given the small number of cells within these mixed cell type clusters. The top 25 marker genes of the 25 clusters by fold change was determined using the Seurat function FindAllMarkers with logfc.threshold = 0.25, min.pct = 0.1, test.use = "roc" and return.thresh = 0.4 (Table S18).

## Signature scoring

Signatures were assembled from Hallmark, Reactome, Biocarta, KEGG and Wikipathways. We used all 50 signatures from the Hallmark collection then manually curated interferon and tumor growth factor beta pathways related to inflammatory signaling (Supplemental Tables S19 and S20). Symbols were converted from human to mouse with the R libraries biomaRt version 2.42.1 and org.Mm.eg.db version 3.10.0, using the function getLDS. We scored each individual cell in the dataset for each signature using Seurat's AddModuleScore function. A Wilcoxin Rank Sum test was used to compare the scores for each cell from the *Tet2*-wildtype mice to those from the *Tet2*-knockout mice (all exposed to CS/ poly(I:C)) for each signature, adjusting for multiple hypothesis using a Bonferroni correction (Figures 4D and S9C). For scatter plots in Figures 4E-F, we filtered for CS/ poly(I:C) mice and used the mean of cell signature scores in each cluster as x- (*Tet2*-knockout) and y-coordinates (*Tet2*-wild-type). The P-value between genotypes was calculated using the Wilcoxon Rank Sum test followed by fdr adjustment for multiple testing. Gene Set Enrichment Analyses in Figure S9D were performed with the GSEA4.1.0 software, using the Hallmark Interferon alpha and Interferon gamma gene lists that were pre-ranked by the mean difference between *Tet2*-wild-type and *Tet2*-knockout cells of the indicated. Multiple GSEA curves were combined on the same plot using GraphPad Prism software.

## Data and software availability

The scRNA-seq data, gene expression matrices and cell type annotations will be deposited in the Gene Expression Omnibus (<https://www.ncbi.nlm.nih.gov/geo/>). R Scripts written for the analysis of scRNA-seq data will be made available on Github (<https://github.com/vangalenlab>).

## Supplemental References

- 1 NHLBI Trans-Omics for Precision Medicine (TOPMed). TOPMed Projects and their Parent Studies. <https://www.nhlbi.nih.gov/science/trans-omics-precision-medicine-topmed-program>.
- 2 Regan, E. A. *et al.* Genetic epidemiology of COPD (COPDGene) study design. *COPD* **7**, 32-43, doi:10.3109/15412550903499522 (2010).
- 3 NHLBI Trans-Omics for Precision Medicine. TOPMed Projects and their Parent Studies.
- 4 Vestbo, J. *et al.* Evaluation of COPD Longitudinally to Identify Predictive Surrogate End-points (ECLIPSE). *Eur Respir J* **31**, 869-873, doi:10.1183/09031936.00111707 (2008).
- 5 Bycroft, C. *et al.* The UK Biobank resource with deep phenotyping and genomic data. *Nature* **562**, 203-209, doi:10.1038/s41586-018-0579-z (2018).
- 6 Manichaikul, A. *et al.* Robust relationship inference in genome-wide association studies. *Bioinformatics* **26**, 2867-2873, doi:10.1093/bioinformatics/btq559 (2010).
- 7 Qiao, D. *et al.* Whole exome sequencing analysis in severe chronic obstructive pulmonary disease. *Hum Mol Genet* **27**, 3801-3812, doi:10.1093/hmg/ddy269 (2018).
- 8 Van Hout, C. V. *et al.* Whole exome sequencing and characterization of coding variation in 49,960 individuals in the UK Biobank. *bioRxiv*, 572347, doi:10.1101/572347 (2019).
- 9 Bick, A. G. *et al.* Inherited Causes of Clonal Hematopoiesis of Indeterminate Potential in TOPMed Whole Genomes. *bioRxiv*, 782748, doi:10.1101/782748 (2019).
- 10 Gogarten, S. M. *et al.* Genetic association testing using the GENESIS R/Bioconductor package. *Bioinformatics* **35**, 5346-5348, doi:10.1093/bioinformatics/btz567 (2019).
- 11 Moll, M. *et al.* Chronic obstructive pulmonary disease and related phenotypes: polygenic risk scores in population-based and case-control cohorts. *Lancet Respir Med* **8**, 696-708, doi:10.1016/S2213-2600(20)30101-6 (2020).
- 12 Jaiswal, S. *et al.* Clonal Hematopoiesis and Risk of Atherosclerotic Cardiovascular Disease. *N Engl J Med* **377**, 111-121, doi:10.1056/NEJMoa1701719 (2017).
- 13 Laucho-Contreras, M. E., Taylor, K. L., Mahadeva, R., Boukedes, S. S. & Owen, C. A. Automated measurement of pulmonary emphysema and small airway remodeling in cigarette smoke-exposed mice. *J Vis Exp*, 52236, doi:10.3791/52236 (2015).

## **NHLBI Trans-Omics for Precision Medicine Consortium Investigators**

Namiko Abe  
Christine Albert  
Laura Almasy  
Alvaro Alonso  
Seth Ament  
Peter Anderson  
Pramod Anugu  
Deborah Applebaum-Bowden  
Dan Arking  
Allison Ashley-Koch  
Stella Aslibekyan  
Tim Assimes  
Dimitrios Avramopoulos  
John Barnard  
R. Graham Barr  
Emily Barron-Casella  
Lucas Barwick  
Terri Beaty  
Gerald Beck  
Diane Becker  
Rebecca Beer  
Amber Beitelshes  
Emelia Benjamin  
Panagiotis Benos  
Marcos Bezerra  
Larry Bielak  
Russell Bowler  
Jennifer Brody  
Ulrich Broeckel  
Karen Bunting  
Carlos Bustamante  
Jonathan Cardwell  
Vincent Carey  
Cara Carty  
Richard Casaburi  
James Casella  
Peter Castaldi  
Mark Chaffin  
Christy Chang  
Yi-Cheng Chang  
Daniel Chasman

Sameer Chavan  
Bo-Juen Chen  
Wei-Min Chen  
Seung Hoan Choi  
Lee-Ming Chuang  
Mina Chung  
Ren-Hua Chung  
Clary Clish  
Suzy Comhair  
Elaine Cornell  
Carolyn Crandall  
James Crapo  
Jeffrey Curtis  
Coleen Damcott  
Sayantan Das  
Sean David  
Colleen Davis  
Michael DeBaun  
Ranjan Deka  
Dawn DeMeo  
Scott Devine  
Qing Duan  
Ravi Duggirala  
Susan Dutcher  
Charles Eaton  
Lynette Ekunwe  
Adel El Boueiz  
Leslie Emery  
Serpil Erzurum  
Charles Farber  
Matthew Flickinger  
Nora Franceschini  
Chris Frazar  
Mao Fu  
Stephanie M. Fullerton  
Lucinda Fulton  
Stacey Gabriel  
Weiniu Gan  
Shanshan Gao  
Yan Gao  
Margery Gass  
Bruce Gelb  
Xiaoqi (Priscilla) Geng

Mark Geraci  
Soren Germer  
Robert Gerszten  
Auyon Ghosh  
Richard Gibbs  
Chris Gignoux  
Mark Gladwin  
David Glahn  
Da-Wei Gong  
Harald Goring  
Sharon Graw  
Daniel Grine  
C. Charles Gu  
Yue Guan  
Namrata Gupta  
Jeff Haessler  
Michael Hall  
Daniel Harris  
Nicola L. Hawley  
Ben Heavner  
Ryan Hernandez  
David Herrington  
Craig Hersh  
Bertha Hidalgo  
Brian Hobbs  
John Hokanson  
Elliott Hong  
Karin Hoth  
Chao (Agnes) Hsiung  
Yi-Jen Hung  
Haley Huston  
Chii Min Hwu  
Rebecca Jackson  
Deepti Jain  
Cashell Jaquish  
Min A. Jhun  
Craig Johnson  
Rich Johnston  
Kimberly Jones  
Hyun Min Kang  
Shannon Kelly  
Michael Kessler  
Alyna Khan

Wonji Kim  
Greg Kinney  
Holly Kramer  
Christoph Lange  
Meryl LeBoff  
Seunggeun Shawn Lee  
Wen-Jane Lee  
Jonathon LeFaive  
David Levine  
Joshua Lewis  
Xiaohui Li  
Yun Li  
Henry Lin  
Honghuang Lin  
Keng Han Lin  
Xihong Lin  
Simin Liu  
Yu Liu  
Kathryn Lunetta  
James Luo  
Michael Mahaney  
Barry Make  
Ani Manichaikul  
Lauren Margolin  
Lisa Martin  
Susan Mathai  
Susanne May  
Patrick McArdle  
Merry-Lynn McDonald  
Sean McFarland  
Daniel McGoldrick  
Caitlin McHugh  
Hao Mei  
Luisa Mestroni  
Julie Mikulla  
Nancy Min  
Mollie Minear  
Ryan L. Minster  
Matt Moll  
Courtney Montgomery  
Solomon Musani  
Stanford Mwasongwe  
Josyf C. Mychaleckyj

Girish Nadkarni  
Rakhi Naik  
Take Naseri  
Sergei Nekhai  
Sarah C. Nelson  
Bonnie Neltner  
Deborah Nickerson  
Jeff O'Connell  
Tim O'Connor  
Heather Ochs-Balcom  
David Paik  
James Pankow  
George Papanicolaou  
Afshin Parsa  
Marco Perez  
James Perry  
Ulrike Peters  
Patricia Peyser  
Lawrence S. Phillips  
Toni Pollin  
Wendy Post  
Julia Powers Becker  
Meher Preethi Boorgula  
Michael Preuss  
Pankaj Qasba  
Dandi Qiao  
Zhaohui Qin  
Laura Rasmussen-Torvik  
Aakrosh Ratan  
Robert Reed  
Elizabeth Regan  
Muagututi'a Sefuiva Reupena  
Ken Rice  
Carolina Roselli  
Ingo Ruczinski  
Pamela Russell  
Sarah Ruuska  
Kathleen Ryan  
Danish Saleheen  
Shabnam Salimi  
Steven Salzberg  
Kevin Sandow  
Christopher Scheller

Ellen Schmidt  
Karen Schwander  
Frank Sciurba  
Christine Seidman  
Jonathan Seidman  
Vivien Sheehan  
Stephanie L. Sherman  
Amol Shetty  
Aniket Shetty  
Brian Silver  
Josh Smith  
Tanja Smith  
Sylvia Smoller  
Beverly Snively  
Michael Snyder  
Tamar Sofer  
Nona Sotoodehnia  
Adrienne M. Stilp  
Garrett Storm  
Elizabeth Streeten  
Jessica Lasky Su  
Yun Ju Sung  
Jody Sylvia  
Adam Szpiro  
Carole Sztalryd  
Daniel Taliun  
Hua Tang  
Matthew Taylor  
Simeon Taylor  
Marilyn Telen  
Timothy A. Thornton  
Machiko Threlkeld  
Lesley Tinker  
David Tirschwell  
Sarah Tishkoff  
Hemant Tiwari  
Catherine Tong  
Michael Tsai  
Dhananjay Vaidya  
David Van Den Berg  
Peter VandeHaar  
Scott Vrieze  
Tarik Walker



Robert Wallace  
Avram Walts  
Heming Wang  
Karol Watson  
Bruce Weir  
Lu-Chen Weng  
Jennifer Wessel  
Cristen Willer  
Kayleen Williams  
Carla Wilson  
Joseph Wu  
Huichun Xu  
Lisa Yanek  
Rongze Yang  
Norann Zaghoul  
Yingze Zhang  
Snow Xueyan Zhao  
Wei Zhao  
Degui Zhi  
Xiang Zhou  
Xiaofeng Zhu  
Michael Zody  
Sebastian Zoellner

## **COPDGene Investigators**

### **Administrative Center**

Regan, MD, PhD

### **Genetic Analysis Center**

MD, MPH; Adel El Boueiz, MD, MMSc; Marilyn G. Foreman, MD, MS; Auyon Ghosh, MD; Lystra P. Hayden, MD, MMSc; Craig P. Hersh, MD, MPH; Jacqueline Hetmanski, MS; Brian D. Hobbs, MD, MMSc; John E. Hokanson, MPH, PhD; Wonji Kim, PhD; Nan Laird, PhD; Christoph Lange, PhD; Sharon M. Lutz, PhD; Merry-Lynn McDonald, PhD; Dmitry Prokopenko,

### **Imaging Center**

PhD; MeiLan K. Han, MD, MS; Eric A. Hoffman, Stephen Humphries, PhD; Francine L. Jacobson, MD, MPH; Philip F. Judy, PhD; Ella A. Kazerooni, MD; Alex Kluiber; David A. Lynch, MB; Pietro Nardelli, PhD; John D. Newell, Jr., MD; Aleena Notary; Andrea Oh, MD; Elizabeth A. Regan, MD, PhD; James C. Ross, PhD; Raul San Jose Estepar, PhD; Joyce Schroeder, MD;

### **PFT QA Center**

Robert Jensen, PhD

### **Data Coordinating Center and Biostatistics**

Wilson, MS

### **Epidemiology Core**

PhD; Kendra A. Young, PhD

### **Mortality Adjudication Core**

Barry Make, MD; Susan Murray, ScD; Elizabeth Regan, MD; Xavier Soler, MD; Carla G.

### **Biomarker Core**

Russell P. Bowler, MD, PhD; Katerina Kechris, PhD; Farnoush Banaei-Kashani, PhD

### **COPDGene® Investigators – Clinical Centers**

Ann Arbor VA: Jeffrey L. Curtis, MD; Perry G. Pernicano, MD

Boriek, PhD; Kalpatha Guntupalli, MD; Elizabeth Guy, MD; Amit Parulekar, MD;

MPH; Francine L. Jacobson, MD, MPH; George Washko, MD

D'Souza, MD; Byron Thomashow, MD

Lacey Washington, MD

Tashjian, MD

Hansel, MD, MPH; Karen Horton, MD; Allison Lambert, MD, MHS; Nirupama Putcha, MD, MHS

Richard Casaburi, PhD, MD; Alessandra Adami, PhD; Matthew Budoff, MD; Hans Fischer, MD;

Janos Porszasz, MD, PhD; Harry Rossiter, PhD; William Stringer, MD Michael E. DeBakey

Minneapolis VA: Christine Wendt, MD; Brian Bell, MD; Ken M. Kunisaki, MD, MS

Mario Ponce, MD; Silanath Terpenning, MD; Gloria Westney, MD, MS  
National Jewish Health, Denver, CO: Russell Bowler, MD, PhD; David A. Lynch, MB  
Reliant Medical Group, Worcester, MA: Richard Rosiello, MD; David Pace, MD  
Temple University, Philadelphia, PA: Gerard Chiriac, MD; David Giacobello, MD; Francis  
Cordova, MD; Chandra Dass, MD; Gilbert D'Alonzo, DO; Parag Desai, MD; Michael Jacobs,  
PharmD; Steven Kelsen, MD, PhD; Victor Kim, MD; A. James Mamary, MD; Nathaniel  
Marchetti, DO; Aditi Satti, MD; Kartik Shenoy, MD; Robert M. Steiner, MD; Alex Swift, MD;  
Bhatt, MD; Anand Iyer, MD; Hrudaya Nath, MD; J. Michael Wells, MD  
Yen, MD  
Jr., MD; Brad Thompson, MD  
Wassim Labaki, MD MS; Craig Galban, PhD; Dharshan Vummidi, MD  
Allen, MD  
MD, MSc; Joel Weissfeld, MD, MPH  
Adams, MD; Diego Maselli-Caceres, MD; Mario E. Ruiz, MD; Harjinder Singh
